# Supplementary material
Source: publisher figshare collection journal article supplement (https://brill.figshare.com/articles/dataset/_/27930006)
Supplement: Supplementary file 1 [file 1]

**Population genomics reveals the genetic diversity and  
evolution of the sexual dimorphism of Temminck's tragopan  
(*Tragopan temminckii*)**

**Lu Wang<sup>1</sup>, Pengzhen Huang<sup>2</sup>, Yuhong Guo<sup>1</sup>, Bo Dai<sup>1</sup>, Dong Liang<sup>3,4</sup>,  
Peng Feng<sup>1</sup>, Lidiao Zheng<sup>1</sup>, Tingtao Xu<sup>5</sup>, Longying Wen<sup>1,\*</sup>, Xin Lu<sup>6,\*</sup>  
and Fangqing Liu<sup>1,\*</sup>**

<sup>1</sup> Key Laboratory of Sichuan Institute for Protecting Endangered Birds in the  
Southwest Mountains, College of Life Sciences, Leshan Normal University, Leshan  
614004, Sichuan, China

<sup>2</sup> Department of Anthropology, University of Toronto Scarborough, 1265 Military  
Trail, Toronto, ON M1C 1A4, Canada

<sup>3</sup> Sichuan Mt. Emei Forest Ecosystem National Observation and Research Station,  
Mount Emei 614201, China

<sup>4</sup> Forestry Management Agency of Mount Emei, Mount Emei 614201, China

<sup>5</sup> College of Plant Science, Jilin University, Changchun 130012, China

<sup>6</sup> Department of Ecology, College of Life Sciences, Wuhan University, Wuhan,  
430072, China

\*Corresponding authors: e-mails: [liufangqing2024@163.com](mailto:liufangqing2024@163.com); [xlu@whu.edu.cn](mailto:xlu@whu.edu.cn);  
[lywen02@126.com](mailto:lywen02@126.com)

**Supplementary material**

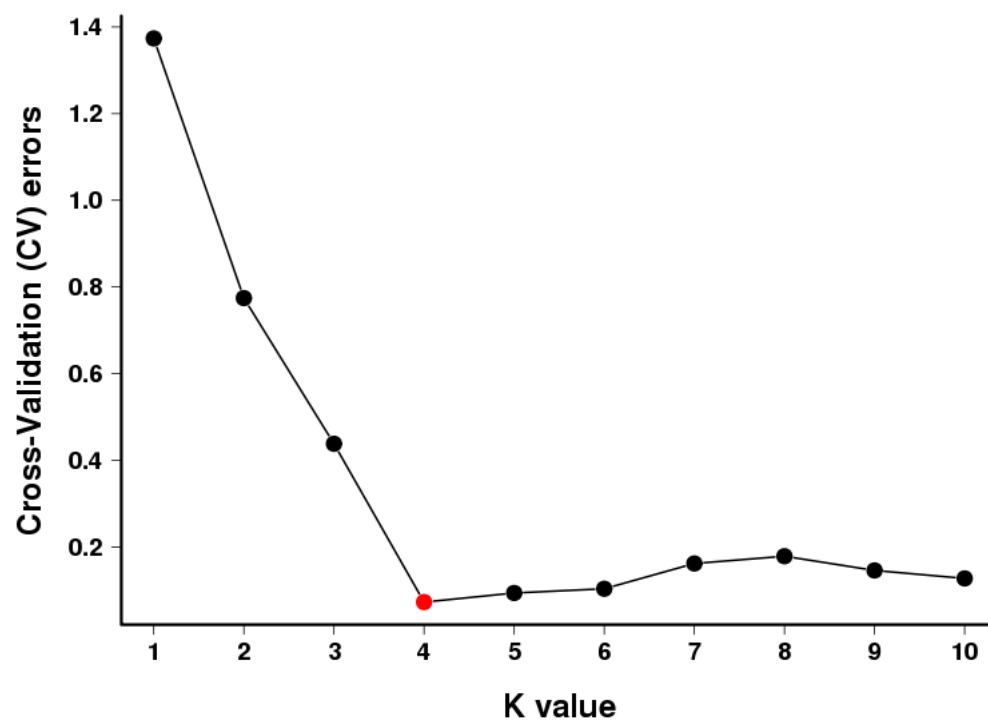

**Figure S1.** The optimal population delineation occurring at  $K = 4$ .

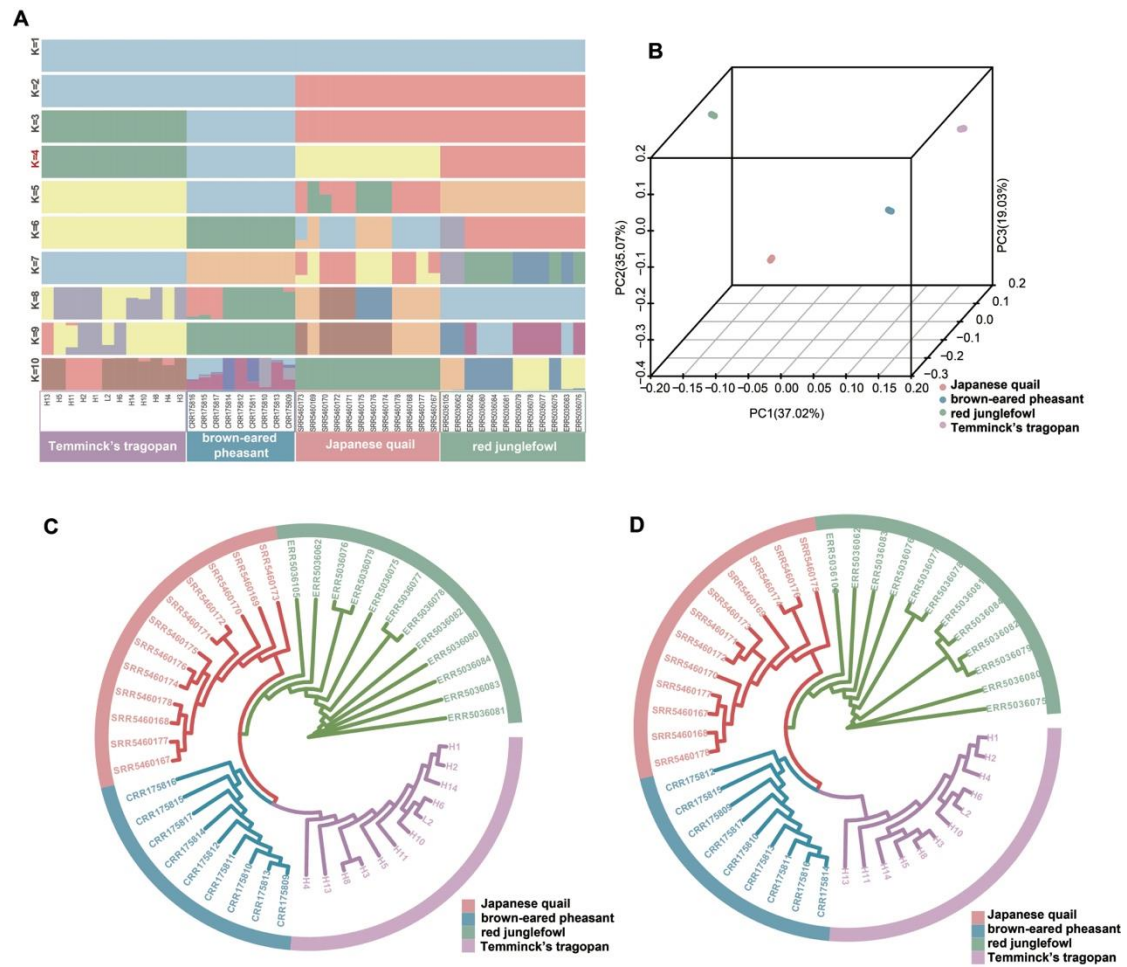

**Figure S2.** Analysis of genetic structure and phylogeny of four Phasianidae species. (A) The STRUCTURE analysis results, K value was set from 1 to 10, (B) PCA analysis results, (C) Phylogenetic tree constructed using MEGA X for four Phasianidae species, and (D) Phylogenetic tree constructed using RAxML for four Phasianidae species.

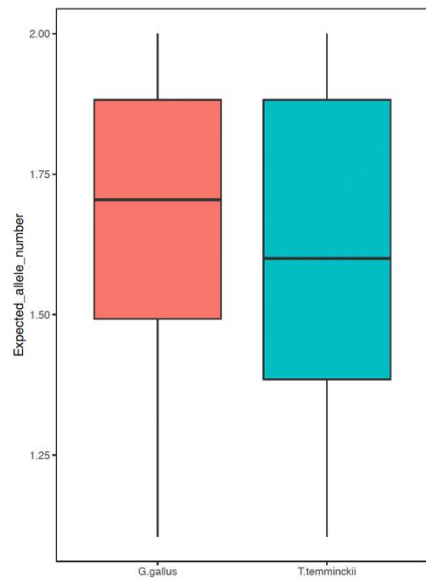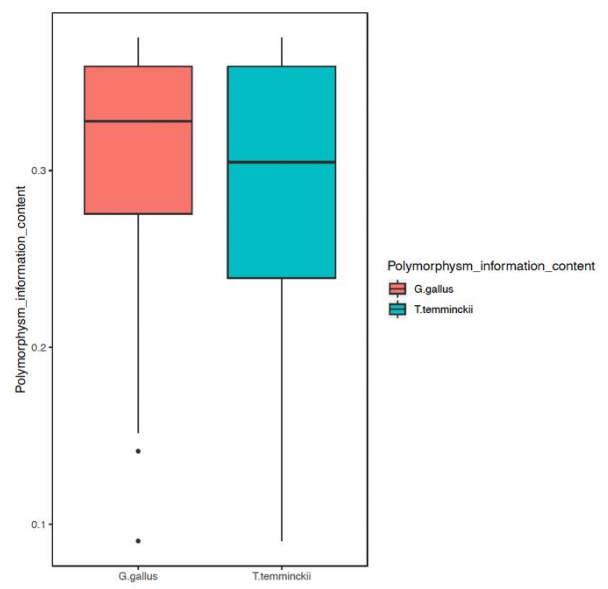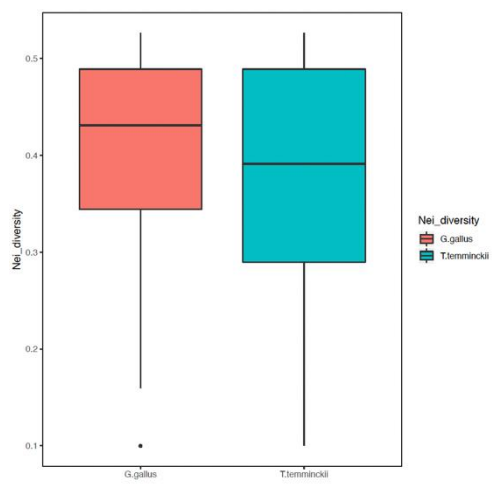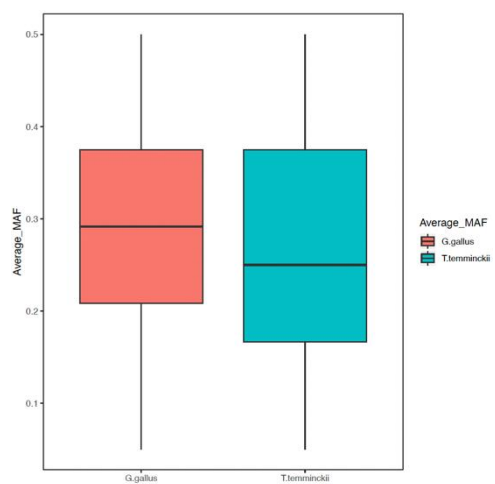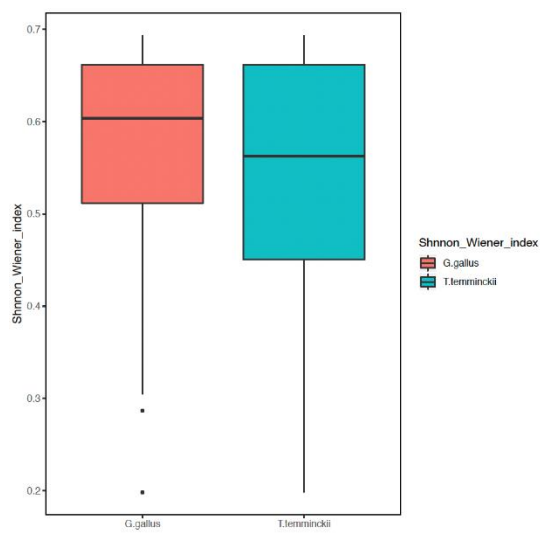

**Figure S3.** Genetic diversity results. *T. temminckii* and *G. Gallus* represent Temminck's tragopan and red junglefowl, respectively.

A

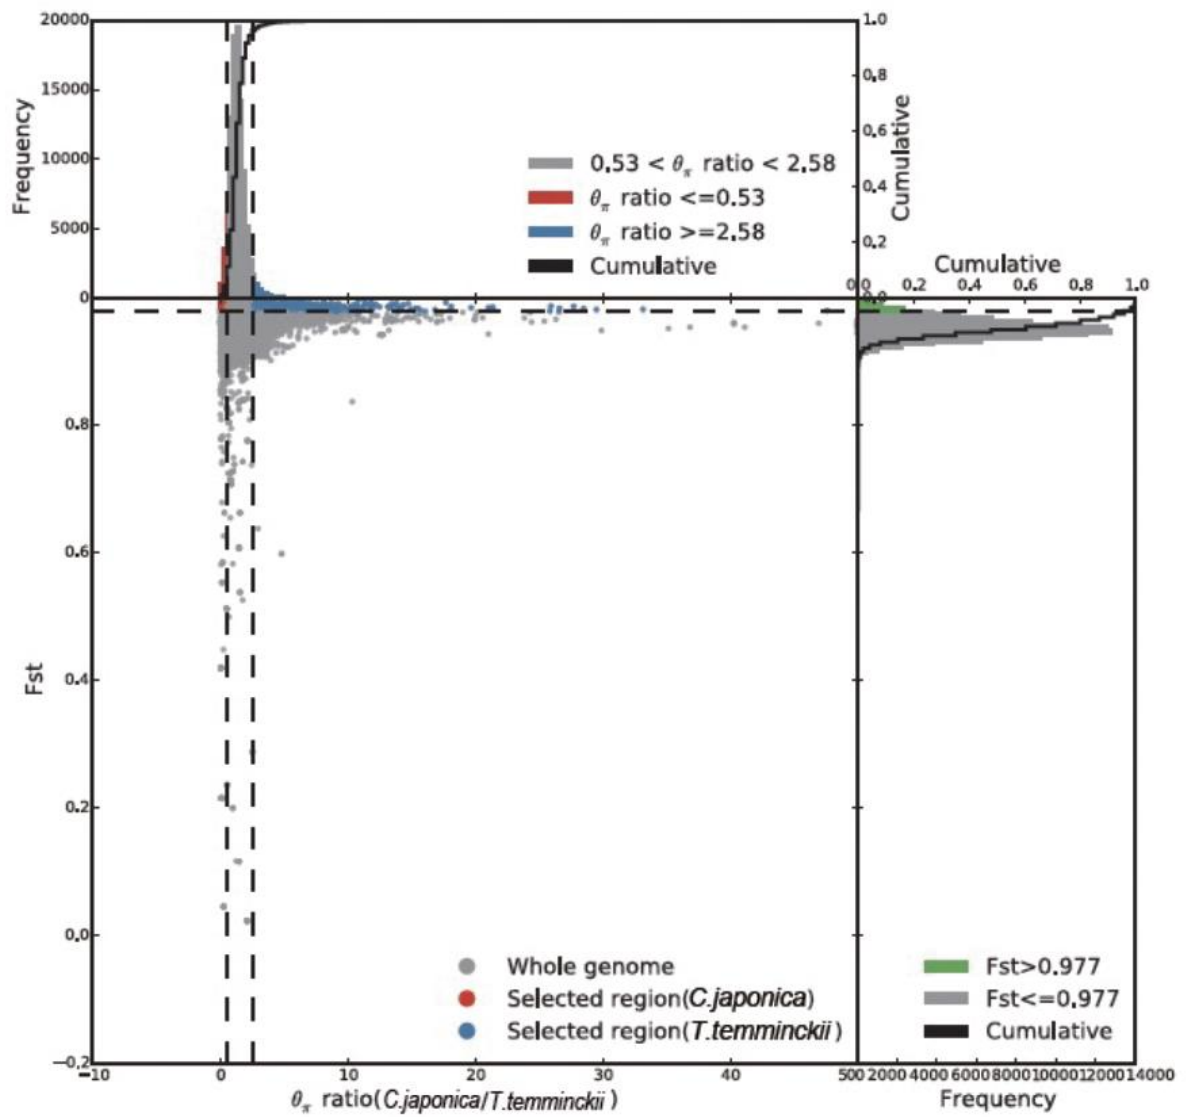

B

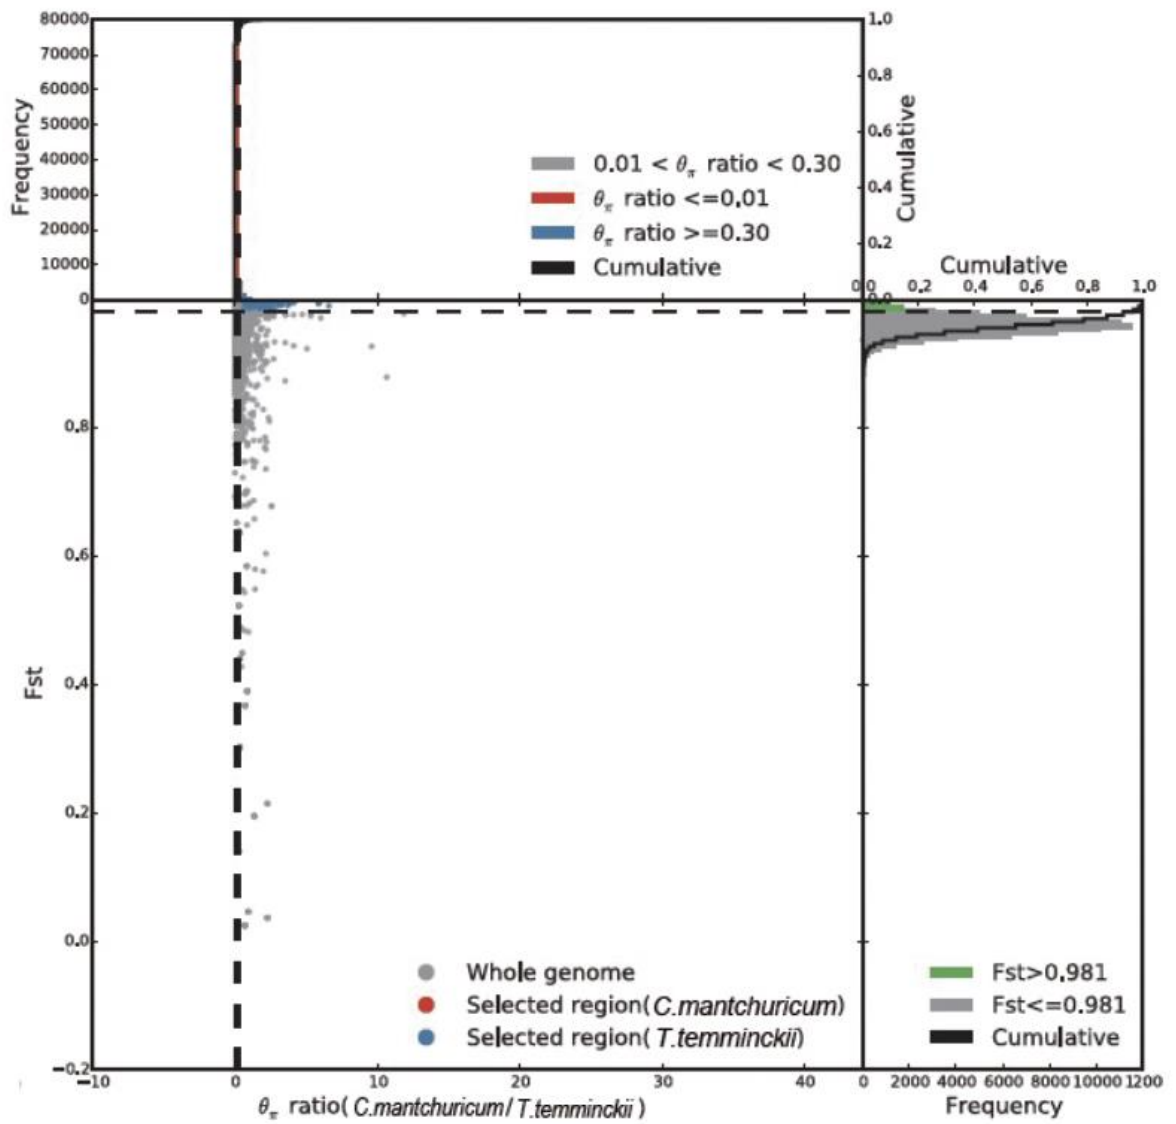

C

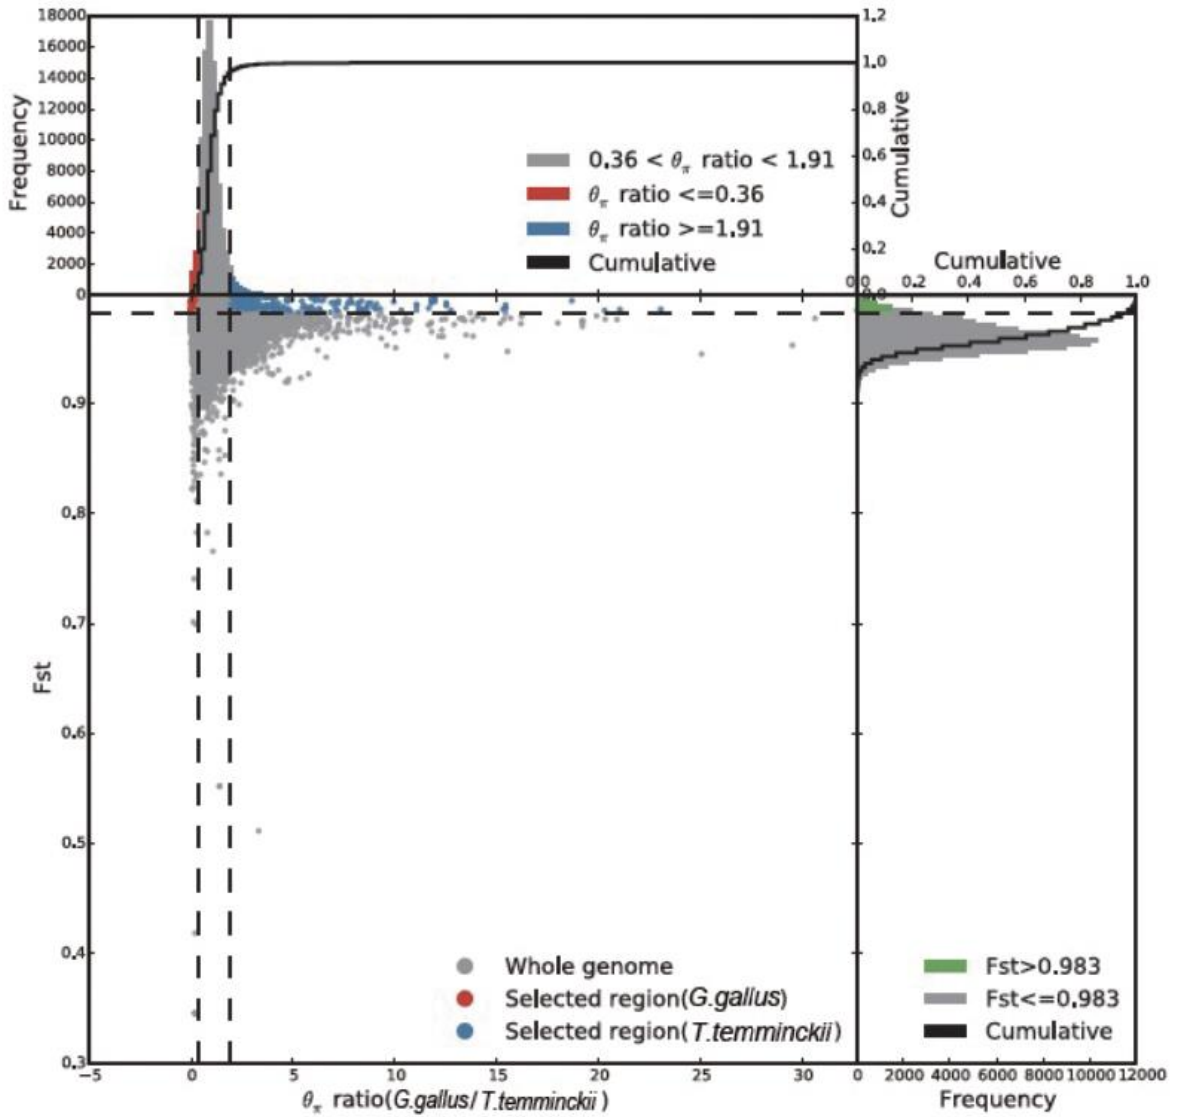

**Figure S4.** Genomic regions with strong selective sweep signals in Temminck's tragopan. (A) Japanese quail vs Temminck's tragopan, (B) brown-eared pheasant vs Temminck's tragopan, (C) red junglefowl vs Temminck's tragopan. *T. temminckii*, *C. japonica*, *G. Gallus* and *C. mantchuricum* represent Temminck's tragopan, Japanese quail, red junglefowl, and brown-eared pheasant, respectively.



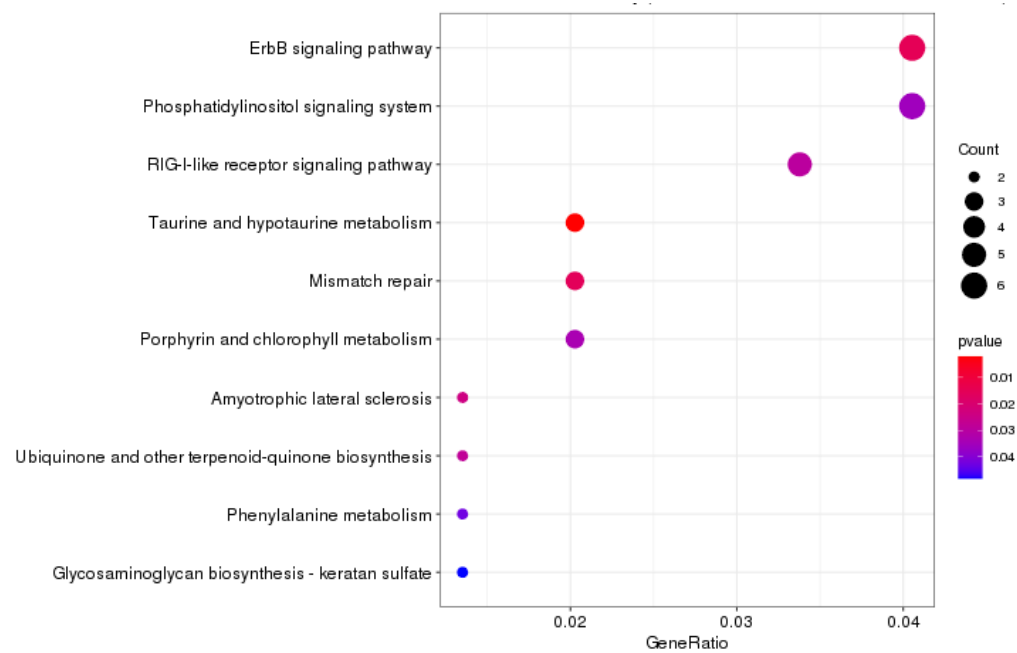

**Figure S5.** Top ten KEGG pathway of candidate genes in Temminck's tragopan (Japanese quail vs Temminck's tragopan).

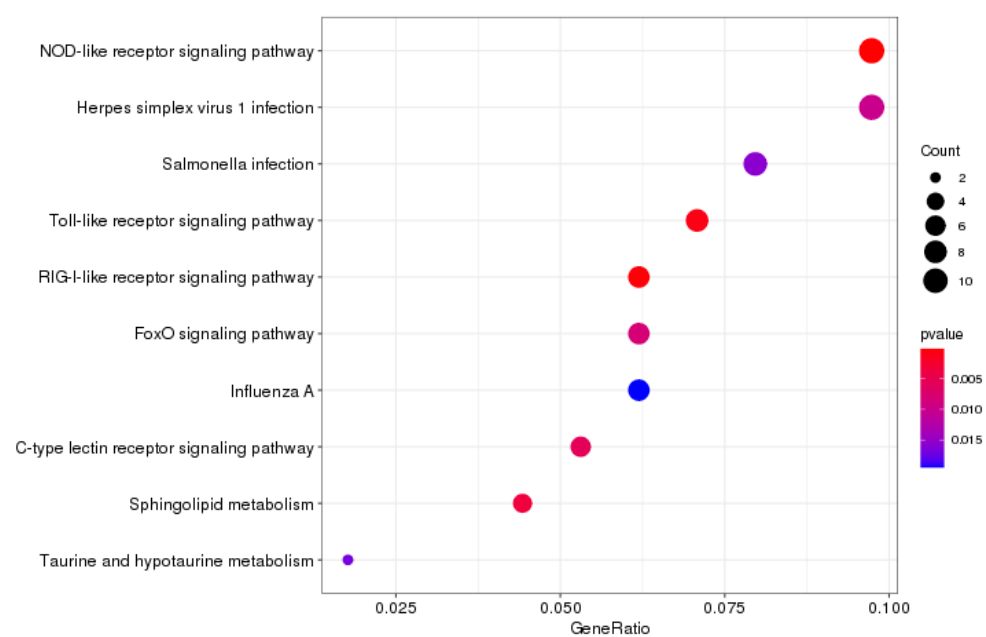

**Figure S6.** Top ten KEGG pathway of candidate genes in Temminck's tragopan (brown-eared pheasant vs Temminck's tragopan).

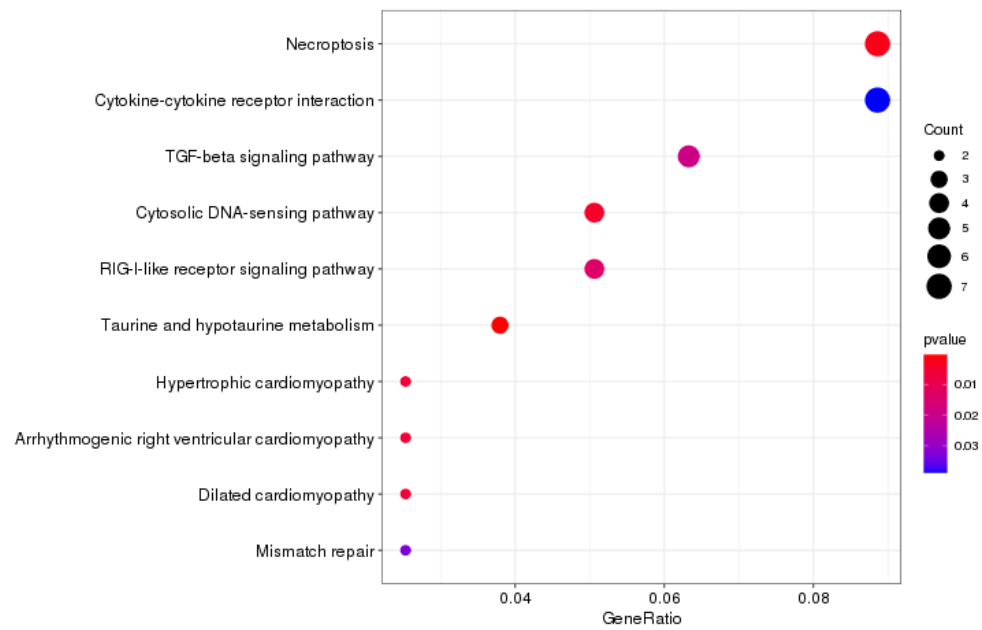

**Figure S7.** Top ten KEGG pathway of candidate genes in Temminck's tragopan (red junglefowl vs Temminck's tragopan).

**A**

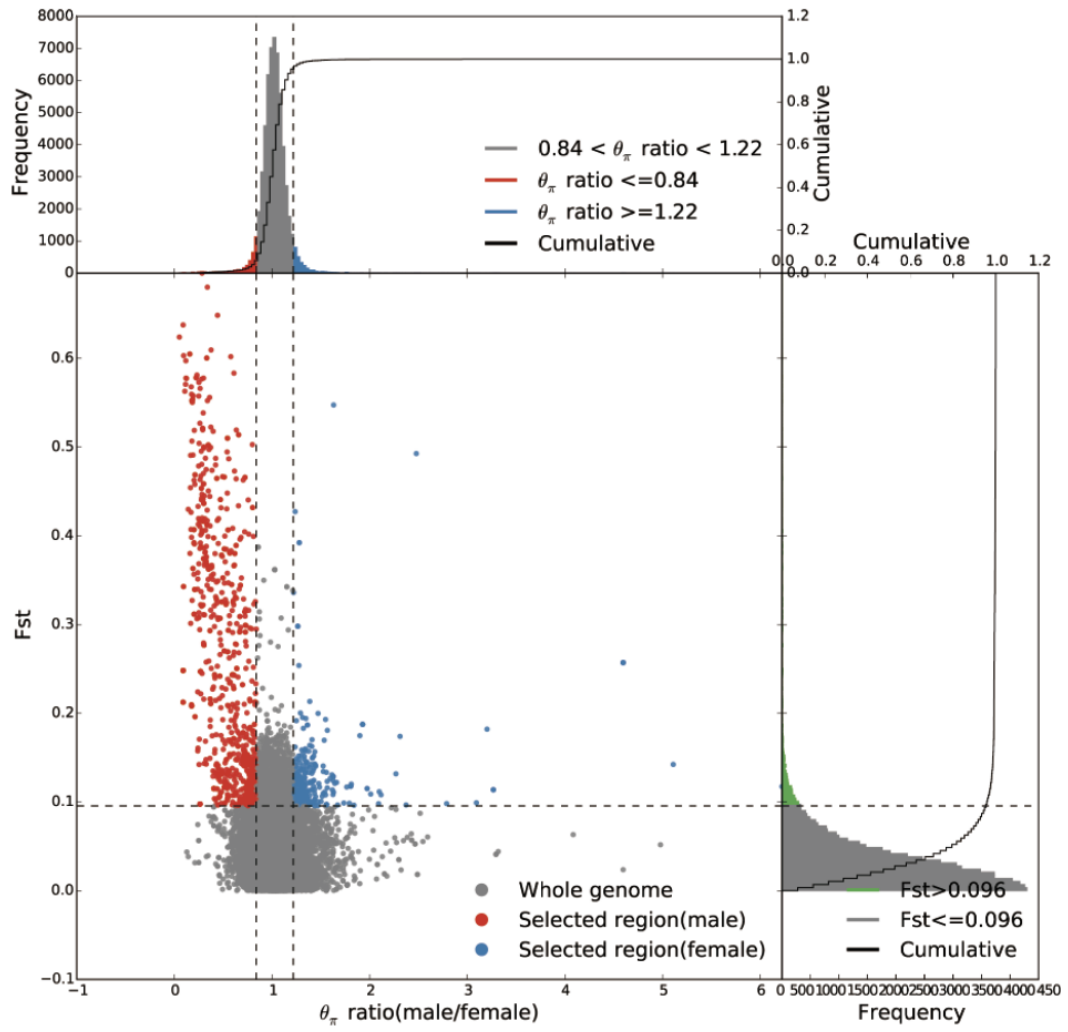

**B**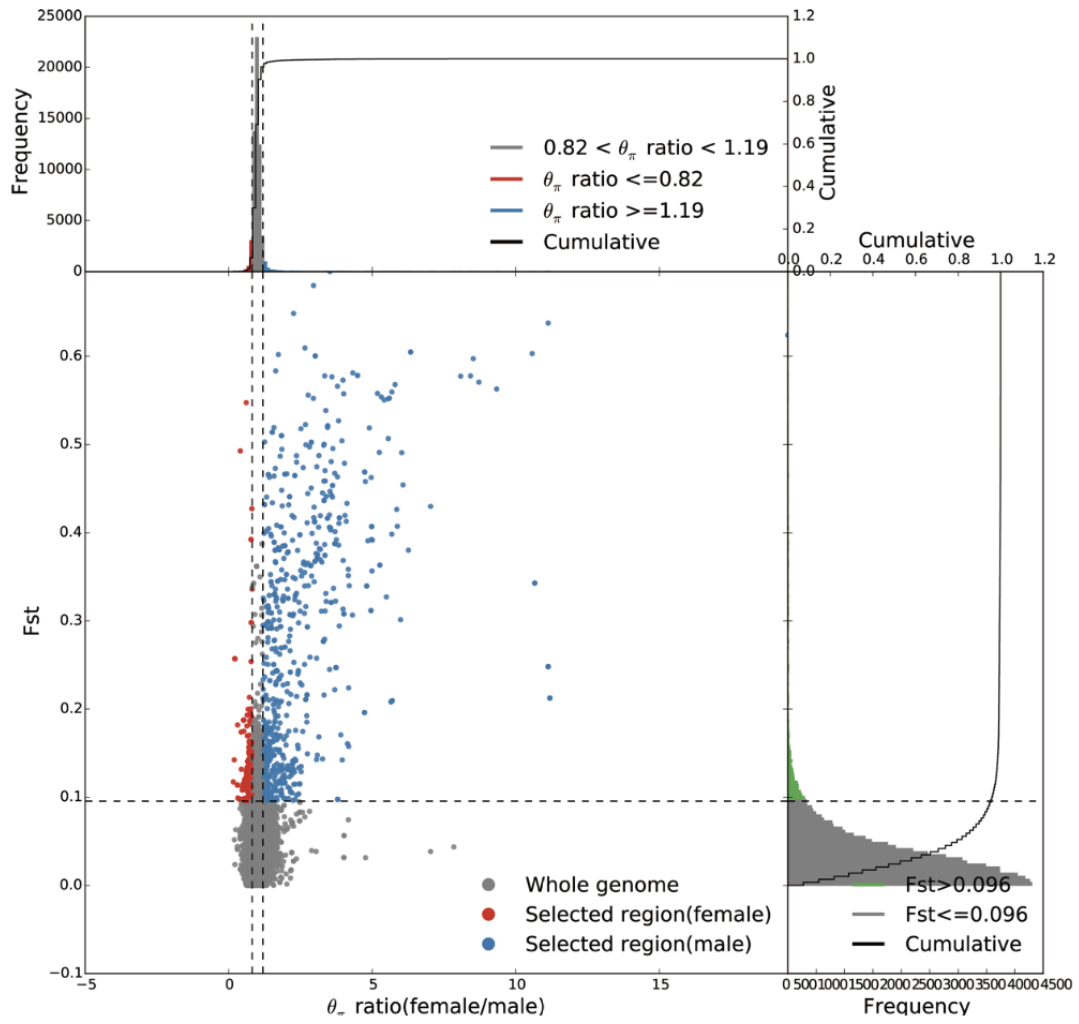

**Figure S8.** Identification of genomic regions with strong selective sweep signals in Temminck's tragopan males and females. (A) male vs female, (B) female vs male.

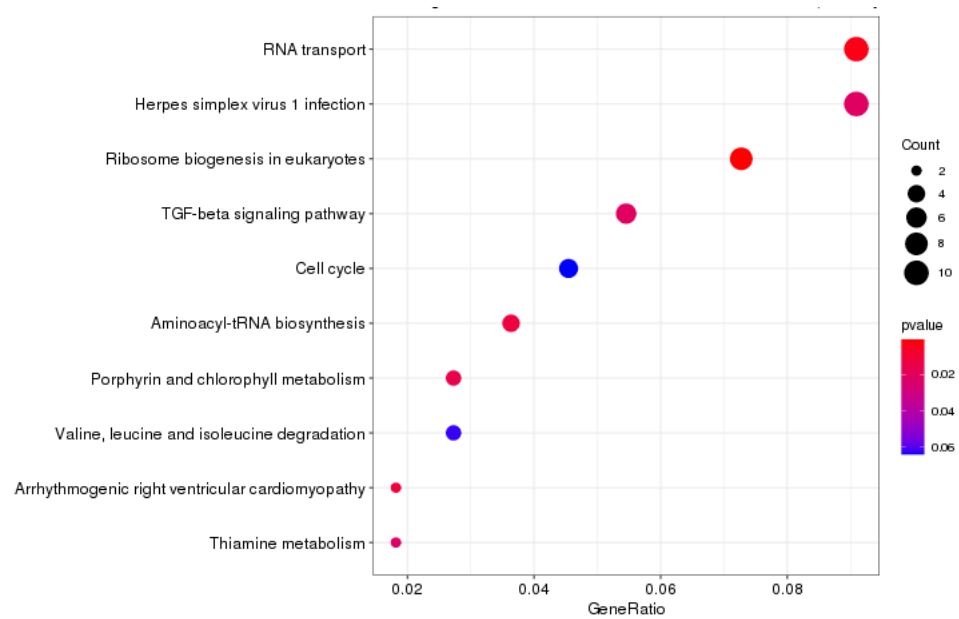

**Figure S9.** Top ten KEGG pathway of candidate genes in male Temminck's tragopan.

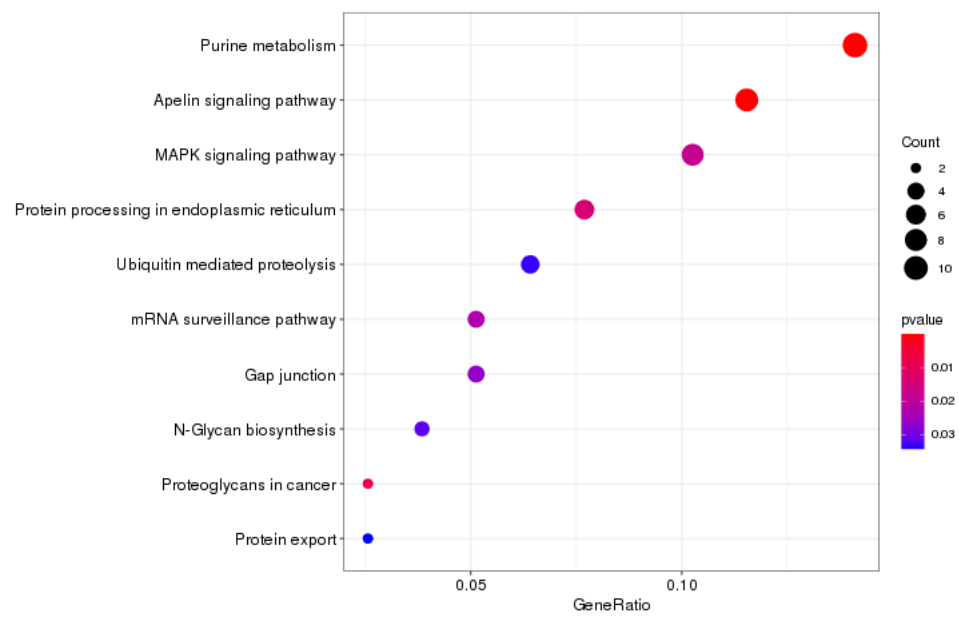

**Figure S10.** Top ten KEGG pathway of candidate genes in female Temminck's tragopan.
