# Supplementary material
Source: publisher figshare collection journal article supplement (https://brill.figshare.com/articles/dataset/_/27930006)
Supplement: Supplementary file 1 [file 1]

## Sheet: Table S1
Table S1. Detailed sequencing statistics of this study, including resequencing data for 12 individuals of Temminck’s tragopan.
ONT_ID	Species (Latin name)	Species (English name)	Data Source	Clean_Reads	Clean_Base	Q20(%)	Q30(%)	GC(%)
CRR175809	Crossoptilon mantchuricum	brown-eared pheasant	NCBI (PRJCA003284 https://ngdc.cncb.ac.cn/gsa/browse/CRA003117)	100116368	30034910400	97.74	94.90	42.11
CRR175810	Crossoptilon mantchuricum	brown-eared pheasant	NCBI (PRJCA003284 https://ngdc.cncb.ac.cn/gsa/browse/CRA003117)	54286888	16286066400	96.11	91.72	41.57
CRR175811	Crossoptilon mantchuricum	brown-eared pheasant	NCBI (PRJCA003284 https://ngdc.cncb.ac.cn/gsa/browse/CRA003117)	66696687	20009006100	97.67	94.79	42.47
CRR175812	Crossoptilon mantchuricum	brown-eared pheasant	NCBI (PRJCA003284 https://ngdc.cncb.ac.cn/gsa/browse/CRA003117)	50030361	15009108300	95.91	91.39	41.92
CRR175813	Crossoptilon mantchuricum	brown-eared pheasant	NCBI (PRJCA003284 https://ngdc.cncb.ac.cn/gsa/browse/CRA003117)	90701165	27210349500	97.75	94.91	42.36
CRR175814	Crossoptilon mantchuricum	brown-eared pheasant	NCBI (PRJCA003284 https://ngdc.cncb.ac.cn/gsa/browse/CRA003117)	51424502	15427350600	96.09	91.68	41.77
CRR175815	Crossoptilon mantchuricum	brown-eared pheasant	NCBI (PRJCA003284 https://ngdc.cncb.ac.cn/gsa/browse/CRA003117)	46700222	14010066600	96.90	93.22	41.69
CRR175816	Crossoptilon mantchuricum	brown-eared pheasant	NCBI (PRJCA003284 https://ngdc.cncb.ac.cn/gsa/browse/CRA003117)	46835434	14050630200	97.06	93.49	41.69
CRR175817	Crossoptilon mantchuricum	brown-eared pheasant	NCBI (PRJCA003284 https://ngdc.cncb.ac.cn/gsa/browse/CRA003117)	101589537	30476861100	97.58	94.43	41.76
ERR5036062	Gallus gallus	red junglefowl	NCBI (PRJEB42301 https://www.ncbi.nlm.nih.gov/Traces/study/?acc=ERP126139&o=acc_s%3Aa)	39769657	9942414250	95.06	90.91	41.77
ERR5036075	Gallus gallus	red junglefowl	NCBI (PRJEB42301 https://www.ncbi.nlm.nih.gov/Traces/study/?acc=ERP126139&o=acc_s%3Aa)	54261670	10852334000	96.64	93.41	40.31
ERR5036076	Gallus gallus	red junglefowl	NCBI (PRJEB42301 https://www.ncbi.nlm.nih.gov/Traces/study/?acc=ERP126139&o=acc_s%3Aa)	52999570	10599914000	96.45	93.06	40.49
ERR5036077	Gallus gallus	red junglefowl	NCBI (PRJEB42301 https://www.ncbi.nlm.nih.gov/Traces/study/?acc=ERP126139&o=acc_s%3Aa)	49393819	9878763800	96.49	93.16	40.64
ERR5036078	Gallus gallus	red junglefowl	NCBI (PRJEB42301 https://www.ncbi.nlm.nih.gov/Traces/study/?acc=ERP126139&o=acc_s%3Aa)	52061368	10412273600	96.23	92.67	40.40
ERR5036079	Gallus gallus	red junglefowl	NCBI (PRJEB42301 https://www.ncbi.nlm.nih.gov/Traces/study/?acc=ERP126139&o=acc_s%3Aa)	49665071	9933014200	95.95	91.96	41.21
ERR5036080	Gallus gallus	red junglefowl	NCBI (PRJEB42301 https://www.ncbi.nlm.nih.gov/Traces/study/?acc=ERP126139&o=acc_s%3Aa)	48807617	9761523400	96.28	92.83	40.55
ERR5036081	Gallus gallus	red junglefowl	NCBI (PRJEB42301 https://www.ncbi.nlm.nih.gov/Traces/study/?acc=ERP126139&o=acc_s%3Aa)	53006434	10601286800	96.73	93.38	39.89
ERR5036082	Gallus gallus	red junglefowl	NCBI (PRJEB42301 https://www.ncbi.nlm.nih.gov/Traces/study/?acc=ERP126139&o=acc_s%3Aa)	50438622	10087724400	96.64	93.40	40.29
ERR5036083	Gallus gallus	red junglefowl	NCBI (PRJEB42301 https://www.ncbi.nlm.nih.gov/Traces/study/?acc=ERP126139&o=acc_s%3Aa)	62520706	12504141200	97.42	93.61	41.34
ERR5036084	Gallus gallus	red junglefowl	NCBI (PRJEB42301 https://www.ncbi.nlm.nih.gov/Traces/study/?acc=ERP126139&o=acc_s%3Aa)	62497460	12499492000	95.78	90.19	41.51
ERR5036105	Gallus gallus	red junglefowl	NCBI (PRJEB42301 https://www.ncbi.nlm.nih.gov/Traces/study/?acc=ERP126139&o=acc_s%3Aa)	41321882	10330470500	95.81	92.22	38.69
H1	Tragopan temminckii	Temminck’s tragopan	From our study	116711992	34801369562	98.70	95.40	43.98
H10	Tragopan temminckii	Temminck’s tragopan	From our study	76515695	22801213686	98.80	95.97	41.86
H11	Tragopan temminckii	Temminck’s tragopan	From our study	73739739	21988367186	98.90	96.21	42.47
H13	Tragopan temminckii	Temminck’s tragopan	From our study	117609050	35061455684	98.88	96.11	43.76
H14	Tragopan temminckii	Temminck’s tragopan	From our study	100748435	29973201660	98.75	95.82	42.41
H2	Tragopan temminckii	Temminck’s tragopan	From our study	83848808	24949061872	98.48	94.95	42.78
H3	Tragopan temminckii	Temminck’s tragopan	From our study	68121847	20213298036	98.82	96.06	43.44
H4	Tragopan temminckii	Temminck’s tragopan	From our study	81156117	24102886566	98.72	95.76	43.43
H5	Tragopan temminckii	Temminck’s tragopan	From our study	128907697	38320873630	99.01	96.59	43.22
H6	Tragopan temminckii	Temminck’s tragopan	From our study	107213984	31734811534	99.17	97.12	42.45
H8	Tragopan temminckii	Temminck’s tragopan	From our study	70188783	20942761224	98.72	95.70	41.86
L2	Tragopan temminckii	Temminck’s tragopan	From our study	74699590	22409877000	95.61	89.16	42.17
SRR5460167	Coturnix japonica	Japanese quail	NCBI (PRJNA339911 https://www.ncbi.nlm.nih.gov/Traces/study/?acc=SRP104331&o=acc_s%3Aa)	130153949	23427710820	96.00	91.10	43.26
SRR5460168	Coturnix japonica	Japanese quail	NCBI (PRJNA339911 https://www.ncbi.nlm.nih.gov/Traces/study/?acc=SRP104331&o=acc_s%3Aa)	116088552	20895939360	96.23	91.63	42.80
SRR5460169	Coturnix japonica	Japanese quail	NCBI (PRJNA339911 https://www.ncbi.nlm.nih.gov/Traces/study/?acc=SRP104331&o=acc_s%3Aa)	113552395	20439431100	96.03	91.10	43.14
SRR5460170	Coturnix japonica	Japanese quail	NCBI (PRJNA339911 https://www.ncbi.nlm.nih.gov/Traces/study/?acc=SRP104331&o=acc_s%3Aa)	123218767	22179378060	95.98	91.07	42.97
SRR5460171	Coturnix japonica	Japanese quail	NCBI (PRJNA339911 https://www.ncbi.nlm.nih.gov/Traces/study/?acc=SRP104331&o=acc_s%3Aa)	123547234	22238502120	96.06	91.17	42.93
SRR5460172	Coturnix japonica	Japanese quail	NCBI (PRJNA339911 https://www.ncbi.nlm.nih.gov/Traces/study/?acc=SRP104331&o=acc_s%3Aa)	119234476	21462205680	96.14	91.28	42.92
SRR5460173	Coturnix japonica	Japanese quail	NCBI (PRJNA339911 https://www.ncbi.nlm.nih.gov/Traces/study/?acc=SRP104331&o=acc_s%3Aa)	120565981	21701876580	95.97	90.93	43.08
SRR5460174	Coturnix japonica	Japanese quail	NCBI (PRJNA339911 https://www.ncbi.nlm.nih.gov/Traces/study/?acc=SRP104331&o=acc_s%3Aa)	127318125	22917262500	96.02	91.02	42.96
SRR5460175	Coturnix japonica	Japanese quail	NCBI (PRJNA339911 https://www.ncbi.nlm.nih.gov/Traces/study/?acc=SRP104331&o=acc_s%3Aa)	135365470	24365784600	96.09	91.17	43.17
SRR5460176	Coturnix japonica	Japanese quail	NCBI (PRJNA339911 https://www.ncbi.nlm.nih.gov/Traces/study/?acc=SRP104331&o=acc_s%3Aa)	122823658	22108258440	96.17	91.32	43.27
SRR5460177	Coturnix japonica	Japanese quail	NCBI (PRJNA339911 https://www.ncbi.nlm.nih.gov/Traces/study/?acc=SRP104331&o=acc_s%3Aa)	155535205	27996336900	96.25	91.42	43.05
SRR5460178	Coturnix japonica	Japanese quail	NCBI (PRJNA339911 https://www.ncbi.nlm.nih.gov/Traces/study/?acc=SRP104331&o=acc_s%3Aa)	137963439	24833419020	96.18	91.37	42.98

## Sheet: Table S2
Table S2. The mapping information using BWA in this study.
ONT ID	Total_reads	Mapped(%)	Properly_mapped(%)
CRR175809	200232736	93.17	87.86
CRR175810	108573776	93.05	87.49
CRR175811	133393374	92.83	88.04
CRR175812	100060722	92.58	87.41
CRR175813	181402330	93.02	88.1
CRR175814	102849004	92.88	87.68
CRR175815	93400444	95.09	88.62
CRR175816	93670868	95.09	88.66
CRR175817	203179074	95.42	88.98
ERR5036062	79539314	99.4	98.22
ERR5036075	108523340	99.59	98.46
ERR5036076	105999140	99.57	98.37
ERR5036077	98787638	99.62	98.43
ERR5036078	104122736	99.58	98.36
ERR5036079	99330142	99.54	98.46
ERR5036080	97615234	99.61	98.67
ERR5036081	106012868	99.66	98.89
ERR5036082	100877244	99.64	98.64
ERR5036083	125041412	99.53	97.13
ERR5036084	124994920	99.59	97.26
ERR5036105	82643764	99.77	99.09
H1	233423984	96.51	88.66
H10	153031390	97.36	93.39
H11	147479478	96.91	89.37
H13	235218100	96.27	89.56
H14	201496870	96.8	93.26
H2	167697616	97.07	90.51
H3	136243694	97.06	90.52
H4	162312234	96.83	89.04
H5	257815394	96.79	92.47
H6	214427968	97.8	93.55
H8	140377566	97.22	92.87
L2	149399180	93.76	84.8
SRR5460167	260307898	72.69	59.1
SRR5460168	232177104	73.94	60.95
SRR5460169	227104790	72.96	59.34
SRR5460170	246437534	72.42	59.05
SRR5460171	247094468	72.84	59.42
SRR5460172	238468952	73.74	60.1
SRR5460173	241131962	73.13	59.3
SRR5460174	254636250	73.79	60.13
SRR5460175	270730940	73	59.56
SRR5460176	245647316	72.77	59.15
SRR5460177	311070410	73.12	59.65
SRR5460178	275926878	72.53	59.42

## Sheet: Table S3
Table S3. The depth and coverage in this study.
ONT ID	Ave_depth	Cov_ratio_1X(%)	Cov_ratio_5X(%)	Cov_ratio_10X(%)
CRR175809	25	88.71	85.91	82.58
CRR175810	13	88.04	82.54	65.95
CRR175811	16	88.13	83.48	71.83
CRR175812	12	87.9	81.02	59.82
CRR175813	22	88.56	85.46	80.75
CRR175814	13	87.9	81.44	61.9
CRR175815	12	88.12	81.59	58.66
CRR175816	12	88.12	81.5	58.65
CRR175817	26	89.26	86.41	84.04
ERR5036062	9	97.69	87.28	42.56
ERR5036075	10	97.99	85.96	50.66
ERR5036076	9	98.06	85.55	48.99
ERR5036077	9	98.12	83.7	43.8
ERR5036078	9	97.4	85.41	47.74
ERR5036079	9	97.57	86.38	43.88
ERR5036080	9	97.57	85.6	42.82
ERR5036081	10	97.49	86.43	49.86
ERR5036082	9	97.42	85.22	46.46
ERR5036083	11	97.12	93.19	67.13
ERR5036084	11	97.9	91.93	65.06
ERR5036105	9	96.96	78.86	46.38
H1	27	90.38	87.46	84.12
H10	20	89.68	85.43	78.29
H11	18	89.7	85.83	78.9
H13	28	90.48	87.39	83.56
H14	25	90.13	86.67	82.31
H2	20	89.81	85.71	78.81
H3	16	89.54	83.21	69.91
H4	18	89.82	84.5	74.14
H5	32	90.43	87.71	85.37
H6	27	90.13	87.13	84.18
H8	18	89.55	85.44	78.08
L2	18	90.09	86.79	81.34
SRR5460167	15	76.96	69.65	57.84
SRR5460168	14	76.84	69.72	57.08
SRR5460169	13	76.7	69.15	55.25
SRR5460170	14	76.8	69.26	56.76
SRR5460171	15	76.8	69.26	56.84
SRR5460172	14	76.83	69.77	57.55
SRR5460173	14	76.77	68.91	55.73
SRR5460174	15	76.99	70.35	59.68
SRR5460175	16	77.08	70.7	60.98
SRR5460176	14	76.83	69.03	55.96
SRR5460177	19	77.34	71.69	64.16
SRR5460178	16	77.05	70.38	60.24

## Sheet: Table S4
Table S4. Detailed SNP statistics in this study.
ONT ID	SNPnumber	Transition	Transversion	Ti/Tv	Heterozygosity	Homozygosity	Het-ratio
CRR175809	6747753	4582169	2165584	2.11	22038	6725715	0.0032
CRR175810	6688803	4543430	2145373	2.11	20903	6667900	0.0031
CRR175811	6709544	4557289	2152255	2.11	21858	6687686	0.0032
CRR175812	6661761	4526059	2135702	2.11	21078	6640683	0.0031
CRR175813	6740439	4577451	2162988	2.11	22757	6717682	0.0033
CRR175814	6665673	4528557	2137116	2.11	21116	6644557	0.0031
CRR175815	6700875	4551221	2149654	2.11	19549	6681326	0.0029
CRR175816	6689777	4544018	2145759	2.11	20116	6669661	0.003
CRR175817	6739826	4577065	2162761	2.11	20663	6719163	0.003
ERR5036062	671957	469186	202771	2.31	370179	301778	0.5508
ERR5036075	647128	451061	196067	2.3	324073	323055	0.5007
ERR5036076	649922	453259	196663	2.3	330909	319013	0.5091
ERR5036077	643360	448839	194521	2.3	321610	321750	0.4998
ERR5036078	640213	446088	194125	2.29	327358	312855	0.5113
ERR5036079	648718	452446	196272	2.3	328900	319818	0.5069
ERR5036080	647712	451461	196251	2.3	326004	321708	0.5033
ERR5036081	653555	455681	197874	2.3	335750	317805	0.5137
ERR5036082	648846	452012	196834	2.29	336432	312414	0.5185
ERR5036083	686782	478607	208175	2.29	382494	304288	0.5569
ERR5036084	677176	472182	204994	2.3	359911	317265	0.5314
ERR5036105	558240	389230	169010	2.3	253517	304723	0.4541
H1	7451214	5123302	2327912	2.2	408609	7042605	0.0548
H10	7536103	5178075	2358028	2.19	371678	7164425	0.0493
H11	7495170	5151923	2343247	2.19	391139	7104031	0.0521
H13	7516598	5166669	2349929	2.19	385507	7131091	0.0512
H14	7560739	5194914	2365825	2.19	388136	7172603	0.0513
H2	7385758	5079239	2306519	2.2	395647	6990111	0.0535
H3	7370661	5069333	2301328	2.2	364141	7006520	0.0494
H4	7270095	5001571	2268524	2.2	365400	6904695	0.0502
H5	7585246	5211816	2373430	2.19	411283	7173963	0.0542
H6	7562373	5195970	2366403	2.19	401591	7160782	0.0531
H8	7521976	5169590	2352386	2.19	391524	7130452	0.052
L2	7438868	5112716	2326152	2.19	374404	7064464	0.0503
SRR5460167	5748226	3848238	1899988	2.02	411510	5336716	0.0715
SRR5460168	5734963	3838857	1896106	2.02	413390	5321573	0.072
SRR5460169	5699153	3815519	1883634	2.02	392145	5307008	0.0688
SRR5460170	5714237	3825261	1888976	2.02	395645	5318592	0.0692
SRR5460171	5717632	3827190	1890442	2.02	396596	5321036	0.0693
SRR5460172	5724715	3832240	1892475	2.02	402571	5322144	0.0703
SRR5460173	5704057	3819360	1884697	2.02	399344	5304713	0.07
SRR5460174	5749423	3848041	1901382	2.02	421244	5328179	0.0732
SRR5460175	5739263	3840408	1898855	2.02	403592	5335671	0.0703
SRR5460176	5716683	3827597	1889086	2.02	397254	5319429	0.0694
SRR5460177	5763159	3856375	1906784	2.02	412609	5350550	0.0715
SRR5460178	5746073	3844667	1901406	2.02	388515	5357558	0.0676

## Sheet: Table S5
Table S5. Genetic diversity index of red junglefowl and Temminck’s tragopan.
Group	Average_MAF	Expected_allele_number	Expected_heterozygous_number	Nei_diversity_index	Number_of_poly_marker	Observed_allele_number	Observed_heterozygous_number	Polymorphysm_information_content	Shnnon_Wiener_index
G.gallus	0.293	1.105-2.000(1.671)	0.095-0.500(0.385)	0.100-0.526(0.402)	359887	2.000-2.000(2.000)	0.083-1.000(0.349)	0.090-0.375(0.305)	0.199-0.693(0.568)
T.temminckii	0.267	1.105-2.000(1.613)	0.095-0.500(0.361)	0.100-0.526(0.378)	378167	2.000-2.000(2.000)	0.083-1.000(0.378)	0.090-0.375(0.290)	0.199-0.693(0.540)

## Sheet: Table S6
Table S6. Selective genes of Temminck’s tragopan (Japanese quail vs Temminck’s tragopan).
#Gene_id	Derection
gene-LOC124417122	up
gene-KCNA1	up
gene-KCNA5	up
gene-ANO2	up
gene-NTF3	up
gene-VWF	up
gene-ARHGEF5	up
gene-CD9	up
gene-NOBOX	up
gene-LOC107054332	up
gene-PARP11	up
gene-PRMT1	up
gene-TEAD4	up
gene-TSPAN9	up
gene-LOC107049069	up
gene-LOC768817	up
gene-TRBV6-5	up
gene-DGKB	up
gene-HDAC9	up
gene-VOPP1	up
gene-EGFR	up
gene-LANCL2	up
gene-CNTNAP2	up
gene-CDH10	up
gene-VSTM2A	up
gene-GCFC2	up
gene-LOC121110409	up
gene-LOC124417860	up
gene-MRPL19	up
gene-CCSER1	up
gene-GRID2	up
gene-TENM3	up
gene-FGF20	up
gene-SGCZ	up
gene-DLC1	up
gene-MEIS2	up
gene-CDIN1	up
gene-LOC124417973	up
gene-DPH6	up
gene-LOC112531814	up
gene-NOVA1	up
gene-FOXG1	up
gene-LOC124417991	up
gene-LOC124417992	up
gene-LOC423301	up
gene-PRKD1	up
gene-G2E3	up
gene-AKAP6	up
gene-NPAS3	up
gene-AREL1	up
gene-DLST	up
gene-EIF2B2	up
gene-FCF1	up
gene-MLH3	up
gene-PGF	up
gene-PROX2	up
gene-RPS6KL1	up
gene-YLPM1	up
gene-DIO2	up
gene-NRXN3	up
gene-ALOX15B	up
gene-ANKRD13D	up
gene-BAAT	up
gene-C5H11ORF9	up
gene-CABP4	up
gene-CARNS1	up
gene-CCDC86	up
gene-CD5	up
gene-CD6	up
gene-CLCF1	up
gene-COR8	up
gene-CORO1B	up
gene-CPSF7	up
gene-CYB561A3	up
gene-DAGLA	up
gene-DDB1	up
gene-FEN1	up
gene-GIF	up
gene-GRK2	up
gene-KDM2A	up
gene-LOC100857834	up
gene-LOC101752158	up
gene-LOC107049267	up
gene-LOC107049269	up
gene-LOC107056412	up
gene-LOC107056413	up
gene-LOC121113271	up
gene-LOC124416955	up
gene-LOC430433	up
gene-LOC776507	up
gene-LRRC10B	up
gene-MRGPRH	up
gene-MRPL16	up
gene-MS4A4A	up
gene-OLFR4	up
gene-OSBP	up
gene-PATL1	up
gene-PGA5	up
gene-POLD4	up
gene-PPP1CA	up
gene-PRPF19	up
gene-RAD9A	up
gene-RHOD	up
gene-RPS6KB2	up
gene-SDHAF2	up
gene-SSH3	up
gene-STX3	up
gene-SYT7	up
gene-TKFC	up
gene-TMEM109	up
gene-TMEM132A	up
gene-TMEM138	up
gene-TMEM216	up
gene-TMEM258	up
gene-VPS37C	up
gene-VWCE	up
gene-ZP1	up
gene-FLRT2	up
gene-SYT9	up
gene-TEAD1	up
gene-ATAD1	up
gene-PTEN	up
gene-ALDH18A1	up
gene-INPP5A	up
gene-LOC121113368	up
gene-NKX6-2	up
gene-OPNVA	up
gene-TCTN3	up
gene-CALCRL	up
gene-IFIH1	up
gene-KCNH7	up
gene-C21orf58	up
gene-DIP2A	up
gene-FAM207A	up
gene-FTCD	up
gene-ITGB2	up
gene-KMO	up
gene-LOC107053766	up
gene-LOC121111305	up
gene-LOC121113397	up
gene-LOC124418108	up
gene-LOC124418117	up
gene-LSS	up
gene-MCM3AP	up
gene-PCNT	up
gene-POFUT2	up
gene-S100B	up
gene-YBEY	up
gene-PLA2G4A	up
gene-PTGS2	up
gene-HMCN1	up
gene-IVNS1ABP	up
gene-SWT1	up
gene-TRMT1L	up
gene-ADGRL2	up
gene-CRYZ	up
gene-ERICH3	up
gene-SLC44A5	up
gene-TNNI3K	up
gene-TYW3	up
gene-LOC112532911	up
gene-LOC424727	up
gene-MSH4	up
gene-SGF29	up
gene-COMMD2	up
gene-CP	up
gene-EIF2A	up
gene-GYG1	up
gene-HPS3	up
gene-LOC101750121	up
gene-LOC121111520	up
gene-PFN2	up
gene-RNF13	up
gene-SELENOT	up
gene-SERP1	up
gene-TM4SF1	up
gene-TM4SF18	up
gene-TM4SF4	up
gene-TSC22D2	up
gene-TUBA3E	up
gene-WWTR1	up
gene-GPC2	up
gene-LOC121113454	up
gene-CKMT1B	up
gene-IQGAP3	up
gene-MAP1A	up
gene-PDIA3	up
gene-PPIP5K1	up
gene-TP53BP1	up
gene-TUBGCP4	up
gene-ENS-3	up
gene-LOC100857343	up
gene-LOC101748538	up
gene-LOC107049037	up
gene-LOC107052138	up
gene-LOC107052143	up
gene-LOC112533192	up
gene-OR6B1	up
gene-ADAT1	up
gene-AP1G1	up
gene-ATXN1L	up
gene-CHST4	up
gene-CHST6	up
gene-DHODH	up
gene-DHX38	up
gene-GABARAPL2	up
gene-IST1	up
gene-KARS	up
gene-LOC121111704	up
gene-MARVELD3	up
gene-PHLPP2	up
gene-PMFBP1	up
gene-TAT	up
gene-TERF2IP	up
gene-TMEM231	up
gene-ZNF821	up
gene-FGD5	up
gene-NR2C2	up
gene-ANKHD1	up
gene-APBB3	up
gene-CYSTM1	up
gene-EIF4EBP3	up
gene-HBEGF	up
gene-NRG2	up
gene-PFDN1	up
gene-PURA	up
gene-SLC4A9	up
gene-SRA1	up
gene-LOC112533469	up
gene-NTAN1	up
gene-PDXDC1	up
gene-RRN3	up
gene-CLTCL1	up
gene-HIC2	up
gene-LOC121106898	up
gene-PI4KA	up
gene-SDF2L1	up
gene-SERPIND1	up
gene-SLC25A1	up
gene-SNAP29	up
gene-UBE2L3	up
gene-YDJC	up
gene-LMX1B	up
gene-ARMC7	up
gene-ATP5H	up
gene-GGA3	up
gene-GRB2	up
gene-HN1	up
gene-KCTD2	up
gene-MIF4GD	up
gene-MRPS7	up
gene-NUP85	up
gene-SLC16A5	up
gene-SLC25A19	up
gene-SUMO2	up
gene-TMEM94	up
gene-LLGL2	up
gene-B4GALT5	up
gene-CEBPB	up
gene-FAM65C	up
gene-LOC112530132	up
gene-RNF114	up
gene-SLC9A8	up
gene-SNAI1	up
gene-SPATA2	up
gene-TMEM189	up
gene-UBE2V1	up
gene-GRHL3	up
gene-IFNLR1	up
gene-IL22RA1	up
gene-LBFABP	up
gene-LOC107057415	up
gene-LOC121107463	up
gene-LOC121107464	up
gene-LOC121107465	up
gene-LOC121107466	up
gene-LOC124417365	up
gene-MYOM3	up
gene-NIPAL3	up
gene-RCAN3	up
gene-C2CD2L	up
gene-DPAGT1	up
gene-FEZ1	up
gene-H2AFX	up
gene-HMBS	up
gene-SIK2	up
gene-VPS11	up
gene-AARSD1	up
gene-AOC3	up
gene-BECN1	up
gene-BRCA1	up
gene-CNTD1	up
gene-CNTNAP1	up
gene-COA3	up
gene-EZH1	up
gene-G6PC	up
gene-IFI35	up
gene-LOC121106446	up
gene-PSME3	up
gene-PTGES3L	up
gene-RAMP2	up
gene-RND2	up
gene-RPL27	up
gene-RUNDC1	up
gene-VAT1	up
gene-VPS25	up
gene-WNK4	up
gene-LOC124417427	up
gene-LOC124417428	up
gene-MPP2	up
gene-NBR1	up
gene-CERS4	up
gene-LOC107055318	up
gene-LOC107055319	up
gene-LOC112530458	up
gene-LOC121107720	up
gene-LOC121107724	up
gene-LOC121107725	up
gene-DPP9	up
gene-FEM1A	up
gene-KDM4B	up
gene-LOC107055377	up
gene-LOC124417447	up
gene-LOC420160	up
gene-MYDGF	up
gene-PLIN3	up
gene-PTPRS	up
gene-TICAM1	up
gene-TNFAIP8L1	up
gene-UHRF1	up
gene-CCNO	up
gene-DHX29	up
gene-MCIDAS	up
gene-PLPP1	up
gene-SKIV2L2	up
gene-PDE4D	up
gene-PTPRD	up
gene-FOCAD	up
gene-HACD4	up
gene-IFNKL1	up
gene-LOC107052305	up
gene-LOC121106524	up
gene-LOC121106525	up
gene-LOC121108349	up
gene-APBA1	up
gene-LOC124417508	up
gene-PTAR1	up
gene-LOC101751186	up
gene-TCF4	up
gene-ERCC6L2	up
gene-LRRC2	up
gene-CKS2	up
gene-SECISBP2	up
gene-SEMA4D	up
gene-SHC3	up
gene-MCC	up
gene-YTHDC2	up
gene-MAN2A1	up
gene-FER	up
gene-C5orf63	up
gene-MARCH3	up
gene-MEGF10	up
gene-KIAA0825	up
gene-SLF1	up
gene-ADGRV1	up
gene-COX7C	up
gene-LOC121108310	up
gene-ANKRD34B	up
gene-DHFR	up
gene-FAM151B	up
gene-FAM151BL	up
gene-LOC768418	up
gene-MSH3	up
gene-ZFYVE16	up
gene-LOC107056943	up
gene-LOC121108313	up
gene-LOC121108314	up
gene-LOC121108315	up
gene-ARL14EPL	up
gene-COMMD10	up
gene-LOC768614	up
gene-LOC776018	up
gene-UBAP2	up
gene-LOC121108470	up
gene-SRFBP1	up

## Sheet: Table S7
Table S7. Selective genes of Temminck’s tragopan (brown-eared pheasant vs Temminck’s tragopan).
#Gene_id	Derection
gene-SLITRK5	up
gene-PCDH17	up
gene-LOC124417122	up
gene-APBB1	up
gene-ARFIP2	up
gene-DCHS1	up
gene-HPX	up
gene-ILK	up
gene-LCMT2	up
gene-LOC107052456	up
gene-LOC419074	up
gene-RRP8	up
gene-TAF10	up
gene-TIMM10B	up
gene-TPP1	up
gene-TRIM3	up
gene-IRAG2	up
gene-LOC121107602	up
gene-LOC121107604	up
gene-LOC121113437	up
gene-LOC121113438	up
gene-SPX	up
gene-KCNA1	up
gene-KCNA6	up
gene-NTF3	up
gene-ANO2	up
gene-VWF	up
gene-PRMT1	up
gene-FOXM1	up
gene-LOC107054332	up
gene-PARP11	up
gene-RHNO1	up
gene-TEAD4	up
gene-TSPAN9	up
gene-TULP3	up
gene-FKBP4	up
gene-FOXJ3	up
gene-ITFG2	up
gene-NECAP1	up
gene-A2M	up
gene-A2ML2	up
gene-A2ML3	up
gene-M6PR	up
gene-PHC1	up
gene-BTLA	up
gene-CD200	up
gene-CD200L	up
gene-LOC121110262	up
gene-LOC770026	up
gene-EGFR	up
gene-LANCL2	up
gene-VOPP1	up
gene-VSTM2A	up
gene-EVA1A	up
gene-GCFC2	up
gene-LOC121110409	up
gene-LOC124417860	up
gene-MRPL19	up
gene-USP34	up
gene-XPO1	up
gene-CSMD1	up
gene-LOC124417942	up
gene-MND1	up
gene-TRIM2	up
gene-SFRP2	up
gene-TLR2	up
gene-TLR2A	up
gene-TMEM131L	up
gene-DCHS2	up
gene-FGA	up
gene-FGB	up
gene-FGG	up
gene-LOC100857197	up
gene-PLRG1	up
gene-LAS1L	up
gene-LOC121110573	up
gene-MSN	up
gene-ZC3H12B	up
gene-ZC4H2	up
gene-PDE5A	up
gene-UGT8	up
gene-MTNR1A	up
gene-ASAH1	up
gene-FRG1BP	up
gene-LOC428778	up
gene-FGF20	up
gene-MICU3	up
gene-SGCZ	up
gene-DLC1	up
gene-SLC8A3	up
gene-SMOC1	up
gene-LOC112531814	up
gene-NOVA1	up
gene-G2E3	up
gene-PRKD1	up
gene-SCFD1	up
gene-NPAS3	up
gene-FOXA1	up
gene-LOC121110892	up
gene-TTC6	up
gene-DIO2	up
gene-NRXN3	up
gene-ALOX15B	up
gene-ANKRD13D	up
gene-CLCF1	up
gene-GRK2	up
gene-KDM2A	up
gene-LOC101752158	up
gene-LOC107049267	up
gene-LOC107049269	up
gene-LOC121113271	up
gene-LOC124416955	up
gene-LOC430433	up
gene-LOC776507	up
gene-MRGPRH	up
gene-POLD4	up
gene-RAD9A	up
gene-RHOD	up
gene-SSH3	up
gene-FLRT2	up
gene-LOC121113266	up
gene-SYT9	up
gene-RASSF10	up
gene-LOC107053373	up
gene-MICAL2	up
gene-PARVA	up
gene-ACTA2	up
gene-ANKRD22	up
gene-FAS	up
gene-LIPML4	up
gene-LIPML5	up
gene-STAMBPL1	up
gene-ALDH18A1	up
gene-INPP5A	up
gene-LOC121113368	up
gene-NKX6-2	up
gene-OPNVA	up
gene-TCTN3	up
gene-ADAM8	up
gene-BKJ	up
gene-CHUK	up
gene-CWF19L1	up
gene-ERLIN1	up
gene-LOC121111155	up
gene-LOC121111157	up
gene-LOC121111158	up
gene-LOC121111159	up
gene-LOC121113352	up
gene-LOC121113353	up
gene-LOC121113354	up
gene-LOC121113355	up
gene-LOC770653	up
gene-RNASE6	up
gene-RSFR	up
gene-TUBGCP2	up
gene-KCNH7	up
gene-DPP4	up
gene-FAP	up
gene-GCG	up
gene-IFIH1	up
gene-SLC4A10	up
gene-RBMS1	up
gene-TANK	up
gene-ADARB1	up
gene-C21orf58	up
gene-FAM207A	up
gene-ITGB2	up
gene-KMO	up
gene-LOC124418117	up
gene-PCNT	up
gene-PDC	up
gene-PLA2G4A	up
gene-PTGS2	up
gene-HMCN1	up
gene-IVNS1ABP	up
gene-SWT1	up
gene-TRMT1L	up
gene-LOC112532911	up
gene-LOC424727	up
gene-MSH4	up
gene-SGF29	up
gene-CLDN15	up
gene-DUSP28	up
gene-LOC121111499	up
gene-MAP6D1	up
gene-PARL	up
gene-YEATS2	up
gene-COMMD2	up
gene-EIF2A	up
gene-LOC101750121	up
gene-PFN2	up
gene-RNF13	up
gene-SELENOT	up
gene-SERP1	up
gene-TSC22D2	up
gene-CP	up
gene-GYG1	up
gene-HPS3	up
gene-LOC121111520	up
gene-TM4SF1	up
gene-TM4SF18	up
gene-TM4SF4	up
gene-TUBA3E	up
gene-WWTR1	up
gene-GPC1	up
gene-GPC2	up
gene-LOC121111532	up
gene-LOC121113450	up
gene-LOC121113454	up
gene-LOC121113457	up
gene-LOC100857343	up
gene-LOC101748538	up
gene-LOC101750836	up
gene-LOC107049037	up
gene-LOC107052138	up
gene-LOC107052143	up
gene-LOC112533192	up
gene-MZT2B	up
gene-OR10A4	up
gene-OR6B1	up
gene-SHF	up
gene-ADAT1	up
gene-CHST4	up
gene-CHST6	up
gene-GABARAPL2	up
gene-KARS	up
gene-TAT	up
gene-TERF2IP	up
gene-TMEM231	up
gene-LOC101750299	up
gene-LOC107052165	up
gene-LOC112533293	up
gene-LOC121111697	up
gene-OSGIN1	up
gene-RIPK3	up
gene-CYSTM1	up
gene-NRG2	up
gene-PFDN1	up
gene-PURA	up
gene-GSPT2	up
gene-LOC112533469	up
gene-LOC124417203	up
gene-NTAN1	up
gene-PDXDC1	up
gene-RRN3	up
gene-RSL1D1	up
gene-SNX29	up
gene-CPPED1	up
gene-SHISA9	up
gene-FBXW2	up
gene-GARNL3	up
gene-SLC2A8	up
gene-ARMC7	up
gene-GGA3	up
gene-GRB2	up
gene-HN1	up
gene-MIF4GD	up
gene-MRPS7	up
gene-NUP85	up
gene-SLC16A5	up
gene-SLC25A19	up
gene-SUMO2	up
gene-KIAA0753	up
gene-MED31	up
gene-SLC13A5	up
gene-TXNDC17	up
gene-WSCD1	up
gene-XAF1	up
gene-FBXO39	up
gene-B4GALT5	up
gene-SLC9A8	up
gene-AAK1	up
gene-ANTXR1	up
gene-GFPT1	up
gene-NFU1	up
gene-GRHL3	up
gene-IFNLR1	up
gene-IL22RA1	up
gene-LBFABP	up
gene-LOC121107463	up
gene-LOC121107464	up
gene-LOC124417365	up
gene-MYOM3	up
gene-NIPAL3	up
gene-RCAN3	up
gene-BRPF3	up
gene-MAPK13	up
gene-MAPK14	up
gene-SLC26A8	up
gene-SRPK1	up
gene-TBC1D22B	up
gene-LOC124417427	up
gene-LOC124417428	up
gene-MPP2	up
gene-NBR1	up
gene-CERS4	up
gene-LOC107055318	up
gene-LOC107055319	up
gene-LOC112530458	up
gene-LOC121107720	up
gene-LOC121107724	up
gene-LOC121107725	up
gene-DPP9	up
gene-FEM1A	up
gene-KDM4B	up
gene-LOC124417447	up
gene-PLIN3	up
gene-TICAM1	up
gene-UHRF1	up
gene-LMNB2	up
gene-RPL36	up
gene-SPPL2C	up
gene-TIMM13	up
gene-TMPRSS9	up
gene-CCNO	up
gene-DHX29	up
gene-MCIDAS	up
gene-PLPP1	up
gene-SKIV2L2	up
gene-ADAMTS6	up
gene-CENPK	up
gene-PPWD1	up
gene-ERBIN	up
gene-LOC101749460	up
gene-SREK1	up
gene-GLIS3	up
gene-RFX3	up
gene-PTPRD	up
gene-CNTLN	up
gene-FOCAD	up
gene-HACD4	up
gene-IFNKL1	up
gene-LOC107052305	up
gene-LOC121106524	up
gene-LOC121106525	up
gene-LOC121108349	up
gene-APBA1	up
gene-LOC124417508	up
gene-PTAR1	up
gene-ERCC6L2	up
gene-LRRC2	up
gene-NXNL2	up
gene-SPIN1	up
gene-S1PR3	up
gene-SHC3	up
gene-SECISBP2	up
gene-SEMA4D	up
gene-DIRAS2	up
gene-SYK	up
gene-TPPP2	up
gene-CDC42SE2	up
gene-SPTLC1	up
gene-FER	up
gene-CHRNA8	up
gene-LOC121108286	up
gene-LOC121108288	up
gene-LOC121108289	up
gene-LOC121108290	up
gene-LOC121108291	up
gene-LOC121108300	up
gene-ZNF462	up
gene-FAM172A	up
gene-COX7C	up
gene-LOC121108310	up
gene-ANKRD34B	up
gene-DHFR	up
gene-FAM151B	up
gene-FAM151BL	up
gene-LOC768418	up
gene-MSH3	up
gene-ZFYVE16	up
gene-LOC121108484	up

## Sheet: Table S8
Table S8. Selective genes of Temminck’s tragopan (red junglefowl vs Temminck’s tragopan).
#Gene_id	Derection
gene-LOC121107648	up
gene-LOC124417122	up
gene-NTF3	up
gene-ANO2	up
gene-VWF	up
gene-TSPAN9	up
gene-FKBP4	up
gene-FOXJ3	up
gene-FOXM1	up
gene-ITFG2	up
gene-NECAP1	up
gene-RHNO1	up
gene-TULP3	up
gene-A2ML1	up
gene-A2ML2	up
gene-AICDA	up
gene-LOC124417106	up
gene-MFAP5	up
gene-RIMKLB	up
gene-A2M	up
gene-A2ML3	up
gene-M6PR	up
gene-PHC1	up
gene-EVA1A	up
gene-DCHS2	up
gene-FGA	up
gene-FGB	up
gene-FGG	up
gene-LOC100857197	up
gene-PLRG1	up
gene-GRID2	up
gene-TENM3	up
gene-ASAH1	up
gene-FRG1BP	up
gene-SGCZ	up
gene-LOC121110622	up
gene-LOC121110763	up
gene-LOC121113242	up
gene-LOC121113243	up
gene-M1AP	up
gene-LOC112531814	up
gene-NOVA1	up
gene-FOXG1	up
gene-LOC124417991	up
gene-LOC124417992	up
gene-LOC423301	up
gene-PRKD1	up
gene-AKAP6	up
gene-NPAS3	up
gene-NRXN3	up
gene-ALOX15B	up
gene-ANKRD13D	up
gene-BAAT	up
gene-CABP4	up
gene-CARNS1	up
gene-CCDC86	up
gene-CD5	up
gene-CD6	up
gene-CLCF1	up
gene-CORO1B	up
gene-GIF	up
gene-GRK2	up
gene-KDM2A	up
gene-LOC100857834	up
gene-LOC101752158	up
gene-LOC107049267	up
gene-LOC107049269	up
gene-LOC107056412	up
gene-LOC107056413	up
gene-LOC121113271	up
gene-LOC124416955	up
gene-LOC430433	up
gene-LOC776507	up
gene-MRGPRH	up
gene-MRPL16	up
gene-MS4A4A	up
gene-OSBP	up
gene-PATL1	up
gene-PGA5	up
gene-POLD4	up
gene-PPP1CA	up
gene-PRPF19	up
gene-RAD9A	up
gene-RHOD	up
gene-RPS6KB2	up
gene-SSH3	up
gene-STX3	up
gene-TMEM109	up
gene-TMEM132A	up
gene-VPS37C	up
gene-VWCE	up
gene-ZP1	up
gene-LOC107053373	up
gene-LOC124418013	up
gene-MICAL2	up
gene-PARVA	up
gene-TEAD1	up
gene-LOC107050073	up
gene-LOC768380	up
gene-TNKS2	up
gene-INPP5A	up
gene-ALDH18A1	up
gene-LOC121113368	up
gene-NKX6-2	up
gene-OPNVA	up
gene-TCTN3	up
gene-KCNH7	up
gene-ADARB1	up
gene-C21orf58	up
gene-FAM207A	up
gene-ITGB2	up
gene-KMO	up
gene-LOC124418117	up
gene-PCNT	up
gene-PLA2G4A	up
gene-PTGS2	up
gene-HMCN1	up
gene-IVNS1ABP	up
gene-SWT1	up
gene-TRMT1L	up
gene-ADGRL2	up
gene-LOC112532911	up
gene-LOC424727	up
gene-MSH4	up
gene-SGF29	up
gene-LOC107053946	up
gene-LOC107056653	up
gene-LOC107056669	up
gene-LOC121106495	up
gene-LOC121111373	up
gene-LOC121111374	up
gene-LOC121111376	up
gene-LOC121113428	up
gene-RNF2	up
gene-COMMD2	up
gene-CP	up
gene-EIF2A	up
gene-ERICH6	up
gene-GYG1	up
gene-HPS3	up
gene-LOC101750121	up
gene-LOC121111520	up
gene-PFN2	up
gene-RNF13	up
gene-SELENOT	up
gene-SERP1	up
gene-TM4SF1	up
gene-TM4SF18	up
gene-TM4SF4	up
gene-TSC22D2	up
gene-TUBA3E	up
gene-WWTR1	up
gene-LOC100857343	up
gene-LOC101748538	up
gene-LOC101750836	up
gene-LOC107049037	up
gene-LOC107052138	up
gene-LOC107052143	up
gene-MZT2B	up
gene-OR10A4	up
gene-OR6B1	up
gene-SHF	up
gene-ZFHX3	up
gene-AP1G1	up
gene-ATXN1L	up
gene-IST1	up
gene-PHLPP2	up
gene-ZNF821	up
gene-FGD5	up
gene-NR2C2	up
gene-GSPT2	up
gene-LOC124417203	up
gene-SNX29	up
gene-B4GALT5	up
gene-RNF114	up
gene-SLC9A8	up
gene-SPATA2	up
gene-GLI1	up
gene-INHBE	up
gene-LOC107049250	up
gene-LOC107050760	up
gene-LRP1	up
gene-MYO1A	up
gene-NAB2	up
gene-NEMP1	up
gene-R3HDM2	up
gene-STAT6	up
gene-CBX5	up
gene-COPZ1	up
gene-HNRNPA1	up
gene-HOXC10	up
gene-HOXC8	up
gene-HOXC9	up
gene-ITGA5	up
gene-SMUG1	up
gene-ZNF385A	up
gene-PDE4D	up
gene-ADAMTS6	up
gene-CWC27	up
gene-GLIS3	up
gene-FOCAD	up
gene-HACD4	up
gene-IFNKL1	up
gene-LOC107052305	up
gene-LOC121106524	up
gene-LOC121106525	up
gene-LOC121108349	up
gene-APBA1	up
gene-LOC124417508	up
gene-PTAR1	up
gene-NTRK2	up
gene-LOC101751186	up
gene-TCF4	up
gene-CDC42SE2	up
gene-SPTLC1	up
gene-MCC	up
gene-YTHDC2	up
gene-MAN2A1	up
gene-FER	up
gene-FAM172A	up
gene-ADGRV1	up
gene-ANKRD34B	up
gene-DHFR	up
gene-FAM151B	up
gene-FAM151BL	up
gene-LOC768418	up
gene-MSH3	up
gene-ZFYVE16	up
gene-HSDL2	up
gene-PTBP3	up
gene-SUSD1	up
gene-LOC107056943	up
gene-LOC121108313	up
gene-LOC121108314	up
gene-LOC121108315	up
gene-LOC100857403	up
gene-LOC768614	up
gene-LOC776018	up
gene-UBAP2	up
gene-LOC121108470	up
gene-SRFBP1	up

## Sheet: Table S9
Table S9. KEGG pathways of candidate genes in Temminck’s tragopan (Japanese quail vs Temminck’s tragopan).
ID	Description	GeneRatio	BgRatio	enrich_factor	pvalue	qvalue	geneID
ko00430	Taurine and hypotaurine metabolism	3/148	12/6643	11.22	0.00205671	0.270619	gene-BAAT/gene-TM4SF1/gene-TM4SF4
ko04012	ErbB signaling pathway	6/148	90/6643	2.99	0.014839	0.564436	gene-EGFR/gene-GRB2/gene-HBEGF/gene-NRG2/gene-RPS6KB2/gene-SHC3
ko03430	Mismatch repair	3/148	24/6643	5.61	0.0155664	0.564436	gene-MLH3/gene-MSH3/gene-POLD4
ko05014	Amyotrophic lateral sclerosis	2/148	11/6643	8.16	0.0237672	0.564436	gene-ARMC7/gene-LOC121113397
ko00130	Ubiquinone and other terpenoid-quinone biosynthesis	2/148	12/6643	7.48	0.0281093	0.564436	gene-TAT/gene-TMEM94
ko04622	RIG-I-like receptor signaling pathway	5/148	78/6643	2.88	0.0295166	0.564436	gene-IFIH1/gene-IFNKL1/gene-LOC768614/gene-LOC776018/gene-TKFC
ko00860	Porphyrin and chlorophyll metabolism	3/148	32/6643	4.21	0.0335403	0.564436	gene-CP/gene-HMBS/gene-TM4SF18
ko04070	Phosphatidylinositol signaling system	6/148	110/6643	2.45	0.0356758	0.564436	gene-DGKB/gene-FAM207A/gene-INPP5A/gene-PI4KA/gene-PPIP5K1/gene-PTEN
ko00360	Phenylalanine metabolism	2/148	15/6643	5.98	0.0428191	0.564436	gene-AOC3/gene-TAT
ko00533	Glycosaminoglycan biosynthesis - keratan sulfate	2/148	16/6643	5.61	0.0482355	0.564436	gene-CHST4/gene-CHST6
ko04217	Necroptosis	7/148	152/6643	2.07	0.0526917	0.564436	gene-H2AFX/gene-IFNKL1/gene-LOC768614/gene-LOC776018/gene-PLA2G4A/gene-SPATA2/gene-TICAM1
ko00670	One carbon pool by folate	2/148	18/6643	4.99	0.0597568	0.564436	gene-DHFR/gene-FTCD
ko04540	Gap junction	5/148	97/6643	2.31	0.064769	0.564436	gene-EGFR/gene-ENS-3/gene-GRB2/gene-LOC121113397/gene-TUBA3E
ko05200	Pathways in cancer	2/148	19/6643	4.72	0.0658363	0.564436	gene-CKS2/gene-GRB2
ko05164	Influenza A	7/148	161/6643	1.95	0.0675632	0.564436	gene-IFIH1/gene-IFNKL1/gene-LOC107049069/gene-LOC768614/gene-LOC768817/gene-LOC776018/gene-TICAM1
ko00380	Tryptophan metabolism	3/148	45/6643	2.99	0.0780478	0.564436	gene-C5orf63/gene-DLST/gene-KMO
ko04068	FoxO signaling pathway	6/148	136/6643	1.98	0.08258	0.564436	gene-EGFR/gene-FOXG1/gene-G6PC/gene-GABARAPL2/gene-GRB2/gene-PTEN
ko04910	Insulin signaling pathway	6/148	137/6643	1.97	0.0848563	0.564436	gene-G6PC/gene-GRB2/gene-INPP5A/gene-PPP1CA/gene-RPS6KB2/gene-SHC3
ko00330	Arginine and proline metabolism	3/148	48/6643	2.81	0.0907455	0.564436	gene-ALDH18A1/gene-CARNS1/gene-CKMT1B
ko00340	Histidine metabolism	2/148	24/6643	3.74	0.0989517	0.564436	gene-CARNS1/gene-FTCD
ko00514	Other types of O-glycan biosynthesis	3/148	53/6643	2.54	0.113654	0.564436	gene-POFUT2/gene-SDF2L1/gene-YBEY
ko00562	Inositol phosphate metabolism	4/148	84/6643	2.14	0.117069	0.564436	gene-FAM207A/gene-INPP5A/gene-PI4KA/gene-PTEN
ko04520	Adherens junction	4/148	85/6643	2.11	0.120845	0.564436	gene-EGFR/gene-FER/gene-IQGAP3/gene-SNAI1
ko04623	Cytosolic DNA-sensing pathway	3/148	55/6643	2.45	0.123377	0.564436	gene-IFNKL1/gene-LOC768614/gene-LOC776018
ko04140	Autophagy - animal	6/148	153/6643	1.76	0.12588	0.564436	gene-BECN1/gene-GABARAPL2/gene-LOC420160/gene-PTEN/gene-RPS6KB2/gene-SNAP29
ko04620	Toll-like receptor signaling pathway	5/148	119/6643	1.89	0.125891	0.564436	gene-IFNKL1/gene-LOC768614/gene-LOC776018/gene-S100B/gene-TICAM1
ko00565	Ether lipid metabolism	3/148	57/6643	2.36	0.133392	0.564436	gene-PLA2G4A/gene-PLPP1/gene-TMEM189
ko00410	beta-Alanine metabolism	2/148	29/6643	3.1	0.13564	0.564436	gene-AOC3/gene-CARNS1
ko04130	SNARE interactions in vesicular transport	2/148	30/6643	2.99	0.143304	0.564436	gene-SNAP29/gene-STX3
ko04136	Autophagy - other	2/148	31/6643	2.9	0.151057	0.564436	gene-BECN1/gene-GABARAPL2
ko04912	GnRH signaling pathway	4/148	94/6643	1.91	0.157069	0.564436	gene-EGFR/gene-GRB2/gene-HBEGF/gene-PLA2G4A
ko01040	Biosynthesis of unsaturated fatty acids	2/148	33/6643	2.72	0.166799	0.564436	gene-BAAT/gene-HACD4
ko04621	NOD-like receptor signaling pathway	6/148	167/6643	1.61	0.168367	0.564436	gene-GABARAPL2/gene-IFNKL1/gene-LOC768614/gene-LOC776018/gene-TICAM1/gene-TP53BP1
ko04137	Mitophagy - animal	3/148	66/6643	2.04	0.181569	0.564436	gene-BECN1/gene-GABARAPL2/gene-NBR1
ko00500	Starch and sucrose metabolism	2/148	35/6643	2.56	0.182811	0.564436	gene-G6PC/gene-GYG1
ko03030	DNA replication	2/148	35/6643	2.56	0.182811	0.564436	gene-FEN1/gene-POLD4
ko00561	Glycerolipid metabolism	3/148	67/6643	2.01	0.18719	0.564436	gene-DGKB/gene-PLPP1/gene-TKFC
ko05168	Herpes simplex virus 1 infection	9/148	290/6643	1.39	0.197576	0.564436	gene-EIF2B2/gene-IFIH1/gene-IFNKL1/gene-LOC768614/gene-LOC776018/gene-PDIA3/gene-PPP1CA/gene-S100B/gene-TICAM1
ko04380	Osteoclast differentiation	1/148	10/6643	4.49	0.201855	0.564436	gene-GRB2
ko04722	Neurotrophin signaling pathway	1/148	10/6643	4.49	0.201855	0.564436	gene-GRB2
ko04723	Retrograde endocannabinoid signaling	1/148	10/6643	4.49	0.201855	0.564436	gene-DAGLA
ko05410	Hypertrophic cardiomyopathy	1/148	10/6643	4.49	0.201855	0.564436	gene-SGCZ
ko05412	Arrhythmogenic right ventricular cardiomyopathy	1/148	10/6643	4.49	0.201855	0.564436	gene-SGCZ
ko05414	Dilated cardiomyopathy	1/148	10/6643	4.49	0.201855	0.564436	gene-SGCZ
ko03410	Base excision repair	2/148	38/6643	2.36	0.207214	0.564436	gene-FEN1/gene-POLD4
ko04216	Ferroptosis	2/148	38/6643	2.36	0.207214	0.564436	gene-CP/gene-TM4SF18
ko04810	Regulation of actin cytoskeleton	7/148	218/6643	1.44	0.212551	0.564436	gene-EGFR/gene-FGF20/gene-IQGAP3/gene-ITGB2/gene-PFN2/gene-PPP1CA/gene-SSH3
ko04144	Endocytosis	9/148	297/6643	1.36	0.216585	0.564436	gene-CLTCL1/gene-EGFR/gene-GRK2/gene-IST1/gene-LOC768418/gene-TNFAIP8L1/gene-VPS25/gene-VPS37C/gene-ZFYVE16
ko05165	Human papillomavirus infection	1/148	11/6643	4.08	0.219664	0.564436	gene-GRB2
ko05205	Proteoglycans in cancer	1/148	11/6643	4.08	0.219664	0.564436	gene-GRB2
ko00310	Lysine degradation	3/148	73/6643	1.84	0.221787	0.564436	gene-C5orf63/gene-DLST/gene-EZH1
ko04510	Focal adhesion	7/148	222/6643	1.42	0.225529	0.564436	gene-EGFR/gene-GRB2/gene-PGF/gene-PPP1CA/gene-PTEN/gene-SHC3/gene-VWF
ko04145	Phagosome	6/148	186/6643	1.45	0.23412	0.564436	gene-ENS-3/gene-ITGB2/gene-LOC121113397/gene-LOC420160/gene-S100B/gene-TUBA3E
ko05206	MicroRNAs in cancer	1/148	12/6643	3.74	0.237078	0.564436	gene-GRB2
ko00350	Tyrosine metabolism	2/148	42/6643	2.14	0.240224	0.564436	gene-AOC3/gene-TAT
ko03440	Homologous recombination	2/148	42/6643	2.14	0.240224	0.564436	gene-BRCA1/gene-POLD4
ko04514	Cell adhesion molecules	6/148	193/6643	1.4	0.260179	0.600597	gene-CD6/gene-CNTNAP1/gene-CNTNAP2/gene-ITGB2/gene-NRXN3/gene-TRBV6-5
ko03010	Ribosome	4/148	119/6643	1.51	0.273554	0.620586	gene-MRPL16/gene-MRPL19/gene-MRPS7/gene-RPL27
ko00072	Synthesis and degradation of ketone bodies	1/148	15/6643	2.99	0.287037	0.629467	gene-C5orf63
ko03450	Non-homologous end-joining	1/148	15/6643	2.99	0.287037	0.629467	gene-FEN1
ko00120	Primary bile acid biosynthesis	1/148	16/6643	2.81	0.302957	0.64048	gene-BAAT
ko04151	PI3K-Akt signaling pathway	1/148	16/6643	2.81	0.302957	0.64048	gene-GRB2
ko03420	Nucleotide excision repair	2/148	50/6643	1.8	0.306662	0.64048	gene-DDB1/gene-POLD4
ko04392	Hippo signaling pathway - multiple species	1/148	17/6643	2.64	0.318524	0.654179	gene-WWTR1
ko00480	Glutathione metabolism	2/148	52/6643	1.73	0.323165	0.654179	gene-TM4SF1/gene-TM4SF4
ko04530	Tight junction	5/148	176/6643	1.28	0.355292	0.686541	gene-ENS-3/gene-LLGL2/gene-LOC121113397/gene-MARVELD3/gene-TUBA3E
ko03013	RNA transport	6/148	218/6643	1.24	0.358137	0.686541	gene-ARMC7/gene-EIF2B2/gene-EIF4EBP3/gene-NUP85/gene-SUMO2/gene-VSTM2A
ko04270	Vascular smooth muscle contraction	4/148	137/6643	1.31	0.364656	0.686541	gene-CALCRL/gene-PLA2G4A/gene-PPP1CA/gene-RAMP2
ko00100	Steroid biosynthesis	1/148	21/6643	2.14	0.377414	0.686541	gene-LSS
ko00510	N-Glycan biosynthesis	2/148	59/6643	1.52	0.380004	0.686541	gene-DPAGT1/gene-MAN2A1
ko03460	Fanconi anemia pathway	2/148	59/6643	1.52	0.380004	0.686541	gene-BRCA1/gene-LOC424727
ko04060	Cytokine-cytokine receptor interaction	7/148	267/6643	1.18	0.385058	0.686541	gene-CLCF1/gene-IFNKL1/gene-IFNLR1/gene-IL22RA1/gene-LOC121107463/gene-LOC768614/gene-LOC776018
ko00600	Sphingolipid metabolism	2/148	60/6643	1.5	0.387973	0.686541	gene-CERS4/gene-PLPP1
ko04014	Ras signaling pathway	1/148	22/6643	2.04	0.391328	0.686541	gene-GRB2
ko04390	Hippo signaling pathway	1/148	22/6643	2.04	0.391328	0.686541	gene-WWTR1
ko00900	Terpenoid backbone biosynthesis	1/148	23/6643	1.95	0.404934	0.69265	gene-C5orf63
ko04210	Apoptosis	4/148	145/6643	1.24	0.405339	0.69265	gene-ENS-3/gene-LOC121113397/gene-LOC420160/gene-TUBA3E
ko00590	Arachidonic acid metabolism	2/148	63/6643	1.42	0.411602	0.694336	gene-PLA2G4A/gene-PTGS2
ko04330	Notch signaling pathway	2/148	65/6643	1.38	0.427107	0.711371	gene-ATXN1L/gene-LOC121106446
ko01212	Fatty acid metabolism	2/148	67/6643	1.34	0.442399	0.711506	gene-C5orf63/gene-HACD4
ko04120	Ubiquitin mediated proteolysis	4/148	153/6643	1.17	0.445539	0.711506	gene-BRCA1/gene-DDB1/gene-PRPF19/gene-UBE2L3
ko04370	VEGF signaling pathway	2/148	68/6643	1.32	0.449961	0.711506	gene-PLA2G4A/gene-PTGS2
ko00564	Glycerophospholipid metabolism	3/148	111/6643	1.21	0.451599	0.711506	gene-DGKB/gene-PLA2G4A/gene-PLPP1
ko04142	Lysosome	4/148	157/6643	1.14	0.465345	0.711506	gene-AP1G1/gene-CLTCL1/gene-GGA3/gene-LOC420160
ko00515	Mannose type O-glycan biosynthesis	1/148	28/6643	1.6	0.468562	0.711506	gene-SDF2L1
ko00601	Glycosphingolipid biosynthesis - lacto and neolacto series	1/148	28/6643	1.6	0.468562	0.711506	gene-SERP1
ko03018	RNA degradation	2/148	72/6643	1.25	0.479621	0.711506	gene-PATL1/gene-SKIV2L2
ko00020	Citrate cycle (TCA cycle)	1/148	29/6643	1.55	0.480452	0.711506	gene-DLST
ko01200	Carbon metabolism	3/148	117/6643	1.15	0.486269	0.711506	gene-C5orf63/gene-DLST/gene-TKFC
ko00512	Mucin type O-glycan biosynthesis	1/148	30/6643	1.5	0.492078	0.711506	gene-B4GALT5
ko00650	Butanoate metabolism	1/148	30/6643	1.5	0.492078	0.711506	gene-C5orf63
ko00062	Fatty acid elongation	1/148	31/6643	1.45	0.503445	0.72003	gene-HACD4
ko00592	alpha-Linolenic acid metabolism	1/148	32/6643	1.4	0.51456	0.720269	gene-PLA2G4A
ko00790	Folate biosynthesis	1/148	32/6643	1.4	0.51456	0.720269	gene-DHFR
ko04350	TGF-beta signaling pathway	3/148	130/6643	1.04	0.557541	0.772218	gene-LOC768418/gene-RPS6KB2/gene-ZFYVE16
ko00591	Linoleic acid metabolism	1/148	37/6643	1.21	0.566533	0.776499	gene-PLA2G4A
ko00051	Fructose and mannose metabolism	1/148	38/6643	1.18	0.576245	0.778495	gene-TKFC
ko00071	Fatty acid degradation	1/148	39/6643	1.15	0.58574	0.778495	gene-C5orf63
ko00640	Propanoate metabolism	1/148	39/6643	1.15	0.58574	0.778495	gene-C5orf63
ko03050	Proteasome	1/148	41/6643	1.09	0.604101	0.778636	gene-PSME3
ko03015	mRNA surveillance pathway	2/148	92/6643	0.98	0.612306	0.778636	gene-CPSF7/gene-PPP1CA
ko00052	Galactose metabolism	1/148	42/6643	1.07	0.612976	0.778636	gene-G6PC
ko00630	Glyoxylate and dicarboxylate metabolism	1/148	42/6643	1.07	0.612976	0.778636	gene-C5orf63
ko04010	MAPK signaling pathway	6/148	285/6643	0.94	0.615434	0.778636	gene-EGFR/gene-FGF20/gene-GRB2/gene-NTF3/gene-PGF/gene-PLA2G4A
ko00260	Glycine, serine and threonine metabolism	1/148	43/6643	1.04	0.621653	0.779014	gene-AOC3
ko04672	Intestinal immune network for IgA production	1/148	44/6643	1.02	0.630138	0.782197	gene-TRBV6-5
ko00270	Cysteine and methionine metabolism	1/148	47/6643	0.96	0.654473	0.797359	gene-TAT
ko00620	Pyruvate metabolism	1/148	47/6643	0.96	0.654473	0.797359	gene-C5orf63
ko00513	Various types of N-glycan biosynthesis	1/148	50/6643	0.9	0.677217	0.8175	gene-MAN2A1
ko04340	Hedgehog signaling pathway	1/148	51/6643	0.88	0.684463	0.818735	gene-GRK2
ko00970	Aminoacyl-tRNA biosynthesis	1/148	54/6643	0.83	0.705245	0.828907	gene-KARS
ko04371	Apelin signaling pathway	3/148	163/6643	0.83	0.709512	0.828907	gene-BECN1/gene-GABARAPL2/gene-RPS6KB2
ko00280	Valine, leucine and isoleucine degradation	1/148	55/6643	0.82	0.711866	0.828907	gene-C5orf63
ko03008	Ribosome biogenesis in eukaryotes	2/148	113/6643	0.79	0.72237	0.83376	gene-FCF1/gene-VSTM2A
ko00010	Glycolysis / Gluconeogenesis	1/148	62/6643	0.72	0.754252	0.855492	gene-G6PC
ko04218	Cellular senescence	3/148	176/6643	0.77	0.757302	0.855492	gene-PPP1CA/gene-PTEN/gene-RAD9A
ko04150	mTOR signaling pathway	3/148	177/6643	0.76	0.760704	0.855492	gene-GRB2/gene-PTEN/gene-RPS6KB2
ko00190	Oxidative phosphorylation	2/148	129/6643	0.7	0.787594	0.871883	gene-ATP5H/gene-COX7C
ko03040	Spliceosome	2/148	131/6643	0.69	0.79473	0.871883	gene-DHX38/gene-PRPF19
ko01230	Biosynthesis of amino acids	1/148	70/6643	0.64	0.795158	0.871883	gene-ALDH18A1
ko04920	Adipocytokine signaling pathway	1/148	73/6643	0.61	0.808687	0.878615	gene-G6PC
ko04260	Cardiac muscle contraction	1/148	75/6643	0.6	0.81721	0.878615	gene-COX7C
ko03320	PPAR signaling pathway	1/148	76/6643	0.59	0.821329	0.878615	gene-LBFABP
ko04115	p53 signaling pathway	1/148	84/6643	0.53	0.851128	0.89983	gene-PTEN
ko04146	Peroxisome	1/148	86/6643	0.52	0.857771	0.89983	gene-BAAT
ko04020	Calcium signaling pathway	3/148	214/6643	0.63	0.861677	0.89983	gene-EGFR/gene-FAM207A/gene-TRBV6-5
ko04625	C-type lectin receptor signaling pathway	1/148	96/6643	0.47	0.88682	0.912203	gene-PTGS2
ko05132	Salmonella infection	3/148	229/6643	0.59	0.890642	0.912203	gene-PFN2/gene-S100B/gene-VPS11
ko00240	Pyrimidine metabolism	1/148	99/6643	0.45	0.894324	0.912203	gene-DHODH
ko04114	Oocyte meiosis	1/148	109/6643	0.41	0.915946	0.927071	gene-PPP1CA
ko04261	Adrenergic signaling in cardiomyocytes	1/148	137/6643	0.33	0.955806	0.95794	gene-PPP1CA
ko04512	ECM-receptor interaction	2/148	234/6643	0.38	0.969547	0.95794	gene-VWCE/gene-VWF
ko04080	Neuroactive ligand-receptor interaction	4/148	377/6643	0.48	0.972335	0.95794	gene-CALCRL/gene-GRID2/gene-LOC107049069/gene-LOC768817
ko04141	Protein processing in endoplasmic reticulum	1/148	169/6643	0.27	0.978875	0.95794	gene-PDIA3
ko00230	Purine metabolism	1/148	178/6643	0.25	0.982846	0.95794	gene-PDE4D

## Sheet: Table S10
Table S10. GO terms (including Biological Process, Cellular Component, Molecular Function) of candidate genes in Temminck’s tragopan (Japanese quail vs Temminck’s tragopan).
Biological_Process_enrich.list
ID	Description	GeneRatio	BgRatio	enrich_factor	pvalue	qvalue	geneID
GO:0001701	in utero embryonic development	18/257	248/10946	3.09	2.17591e-05	0.0611317	gene-APBA1/gene-G2E3/gene-GRB2/gene-GRHL3/gene-KDM2A/gene-KDM4B/gene-LLGL2/gene-LOC107055318/gene-LOC107055319/gene-LOC112530458/gene-LOC121107720/gene-LOC121107724/gene-LOC121107725/gene-MAN2A1/gene-PCNT/gene-RRN3/gene-TCTN3/gene-TMEM231
GO:2001234	negative regulation of apoptotic signaling pathway	13/257	164/10946	3.38	0.000127497	0.1791	gene-BRCA1/gene-EGFR/gene-G2E3/gene-LOC107055318/gene-LOC107055319/gene-LOC112530458/gene-LOC121107720/gene-LOC121107724/gene-LOC121107725/gene-NRG2/gene-RRN3/gene-SNAI1/gene-WWTR1
GO:0035264	multicellular organism growth	7/257	56/10946	5.32	0.000314778	0.207775	gene-APBA1/gene-G6PC/gene-GRHL3/gene-KDM2A/gene-LLGL2/gene-PCNT/gene-SLC4A9
GO:0036335	intestinal stem cell homeostasis	8/257	75/10946	4.54	0.000358905	0.207775	gene-G2E3/gene-LOC107055318/gene-LOC107055319/gene-LOC112530458/gene-LOC121107720/gene-LOC121107724/gene-LOC121107725/gene-ZFYVE16
GO:0007194	negative regulation of adenylate cyclase activity	4/257	16/10946	10.65	0.000432435	0.207775	gene-ADGRV1/gene-AKAP6/gene-MRGPRH/gene-PCNT
GO:0017156	calcium-ion regulated exocytosis	7/257	63/10946	4.73	0.000653271	0.207775	gene-APBA1/gene-CNTNAP1/gene-CNTNAP2/gene-LLGL2/gene-SNAP29/gene-SYT7/gene-SYT9
GO:0035019	somatic stem cell population maintenance	9/257	104/10946	3.69	0.000742002	0.207775	gene-G2E3/gene-LOC107055318/gene-LOC107055319/gene-LOC112530458/gene-LOC121107720/gene-LOC121107724/gene-LOC121107725/gene-TCF4/gene-WWTR1
GO:0048749	compound eye development	17/257	304/10946	2.38	0.00082896	0.207775	gene-ANKHD1/gene-APBA1/gene-EGFR/gene-G2E3/gene-GPC2/gene-GRHL3/gene-KDM4B/gene-LOC107055318/gene-LOC107055319/gene-LOC112530458/gene-LOC121107720/gene-LOC121107724/gene-LOC121107725/gene-MAP1A/gene-SSH3/gene-TENM3/gene-ZNF821
GO:0042078	germ-line stem cell division	8/257	85/10946	4.01	0.000837119	0.207775	gene-G2E3/gene-GPC2/gene-LOC107055318/gene-LOC107055319/gene-LOC112530458/gene-LOC121107720/gene-LOC121107724/gene-LOC121107725
GO:2001243	negative regulation of intrinsic apoptotic signaling pathway	9/257	108/10946	3.55	0.000974022	0.207775	gene-G2E3/gene-LOC107055318/gene-LOC107055319/gene-LOC112530458/gene-LOC121107720/gene-LOC121107724/gene-LOC121107725/gene-RRN3/gene-SNAI1
GO:0048867	stem cell fate determination	4/257	20/10946	8.52	0.00106913	0.207775	gene-GRHL3/gene-NTF3/gene-TCF4/gene-ZFYVE16
GO:0097090	presynaptic membrane organization	4/257	20/10946	8.52	0.00106913	0.207775	gene-CNTNAP1/gene-CNTNAP2/gene-NRXN3/gene-TENM3
GO:0035152	regulation of tube architecture, open tracheal system	7/257	71/10946	4.2	0.00133962	0.207775	gene-CNTNAP1/gene-CNTNAP2/gene-DLC1/gene-EGFR/gene-GRHL3/gene-MPP2/gene-ZNF821
GO:0017145	stem cell division	10/257	136/10946	3.13	0.00135896	0.207775	gene-G2E3/gene-GPC2/gene-LLGL2/gene-LOC107055318/gene-LOC107055319/gene-LOC112530458/gene-LOC121107720/gene-LOC121107724/gene-LOC121107725/gene-ZFYVE16
GO:0048882	lateral line development	4/257	22/10946	7.74	0.00155573	0.207775	gene-LLGL2/gene-SLC44A5/gene-TMEM132A/gene-WWTR1
GO:0019827	stem cell population maintenance	12/257	189/10946	2.7	0.0016702	0.207775	gene-EGFR/gene-G2E3/gene-GPC2/gene-LOC107055318/gene-LOC107055319/gene-LOC112530458/gene-LOC121107720/gene-LOC121107724/gene-LOC121107725/gene-RRN3/gene-TCF4/gene-WWTR1
GO:0045216	cell-cell junction organization	10/257	140/10946	3.04	0.00169037	0.207775	gene-CD9/gene-CDH10/gene-CNTNAP1/gene-CNTNAP2/gene-DLC1/gene-GRHL3/gene-HDAC9/gene-LLGL2/gene-MPP2/gene-SNAI1
GO:0001824	blastocyst development	8/257	95/10946	3.59	0.0017298	0.207775	gene-G2E3/gene-KDM4B/gene-LOC107055318/gene-LOC107055319/gene-LOC112530458/gene-LOC121107720/gene-LOC121107724/gene-LOC121107725
GO:0098727	maintenance of cell number	12/257	190/10946	2.69	0.00174646	0.207775	gene-EGFR/gene-G2E3/gene-GPC2/gene-LOC107055318/gene-LOC107055319/gene-LOC112530458/gene-LOC121107720/gene-LOC121107724/gene-LOC121107725/gene-RRN3/gene-TCF4/gene-WWTR1
GO:0038127	ERBB signaling pathway	6/257	55/10946	4.65	0.00174768	0.207775	gene-DLC1/gene-EGFR/gene-FER/gene-GRB2/gene-NRG2/gene-SHC3
GO:0060563	neuroepithelial cell differentiation	6/257	55/10946	4.65	0.00174768	0.207775	gene-FAM65C/gene-KDM2A/gene-SLC4A9/gene-TCF4/gene-TMEM132A/gene-TMEM231
GO:0060669	embryonic placenta morphogenesis	3/257	11/10946	11.62	0.00183559	0.207775	gene-GRB2/gene-GRHL3/gene-LLGL2
GO:0060713	labyrinthine layer morphogenesis	3/257	11/10946	11.62	0.00183559	0.207775	gene-GRB2/gene-GRHL3/gene-LLGL2
GO:0099054	presynapse assembly	3/257	11/10946	11.62	0.00183559	0.207775	gene-CNTNAP1/gene-CNTNAP2/gene-NRXN3
GO:1902116	negative regulation of organelle assembly	4/257	23/10946	7.41	0.00184888	0.207775	gene-BECN1/gene-BRCA1/gene-FEZ1/gene-PATL1
GO:0007043	cell-cell junction assembly	7/257	76/10946	3.92	0.00199449	0.214059	gene-CD9/gene-CNTNAP1/gene-CNTNAP2/gene-GRHL3/gene-HDAC9/gene-LLGL2/gene-MPP2
GO:0048865	stem cell fate commitment	5/257	39/10946	5.46	0.00205718	0.214059	gene-EGFR/gene-GRHL3/gene-NTF3/gene-TCF4/gene-ZFYVE16
GO:0031056	regulation of histone modification	7/257	78/10946	3.82	0.00231671	0.232455	gene-BRCA1/gene-GCFC2/gene-KDM2A/gene-KDM4B/gene-SLF1/gene-SNAI1/gene-WWTR1
GO:0034330	cell junction organization	10/257	148/10946	2.88	0.00254953	0.246994	gene-CD9/gene-CDH10/gene-CNTNAP1/gene-CNTNAP2/gene-DLC1/gene-GRHL3/gene-HDAC9/gene-LLGL2/gene-MPP2/gene-SNAI1
GO:0019100	male germ-line sex determination	7/257	81/10946	3.68	0.00287361	0.26043	gene-G2E3/gene-LOC107055318/gene-LOC107055319/gene-LOC112530458/gene-LOC121107720/gene-LOC121107724/gene-LOC121107725
GO:0048136	male germ-line cyst formation	7/257	81/10946	3.68	0.00287361	0.26043	gene-G2E3/gene-LOC107055318/gene-LOC107055319/gene-LOC112530458/gene-LOC121107720/gene-LOC121107724/gene-LOC121107725
GO:0007391	dorsal closure	7/257	82/10946	3.64	0.00308035	0.270443	gene-CNTNAP1/gene-CNTNAP2/gene-DLC1/gene-EGFR/gene-FER/gene-LLGL2/gene-ZNF821
GO:2001233	regulation of apoptotic signaling pathway	13/257	232/10946	2.39	0.00327737	0.279021	gene-BRCA1/gene-EGFR/gene-G2E3/gene-LOC107055318/gene-LOC107055319/gene-LOC112530458/gene-LOC121107720/gene-LOC121107724/gene-LOC121107725/gene-NRG2/gene-RRN3/gene-SNAI1/gene-WWTR1
GO:0034329	cell junction assembly	8/257	106/10946	3.21	0.00344367	0.282739	gene-CD9/gene-CNTNAP1/gene-CNTNAP2/gene-DLC1/gene-GRHL3/gene-HDAC9/gene-LLGL2/gene-MPP2
GO:0007542	primary sex determination, germ-line	7/257	84/10946	3.55	0.00352779	0.282739	gene-G2E3/gene-LOC107055318/gene-LOC107055319/gene-LOC112530458/gene-LOC121107720/gene-LOC121107724/gene-LOC121107725
GO:0023061	signal release	8/257	107/10946	3.18	0.00364831	0.282739	gene-APBA1/gene-CNTNAP1/gene-CNTNAP2/gene-LLGL2/gene-NRXN3/gene-SELENOT/gene-SLC44A5/gene-SNAP29
GO:0048884	neuromast development	3/257	14/10946	9.13	0.00384367	0.282739	gene-LLGL2/gene-SLC44A5/gene-TMEM132A
GO:0043009	chordate embryonic development	20/257	443/10946	1.92	0.00391501	0.282739	gene-APBA1/gene-BRCA1/gene-DLC1/gene-G2E3/gene-GRB2/gene-GRHL3/gene-KDM2A/gene-KDM4B/gene-LLGL2/gene-LOC107055318/gene-LOC107055319/gene-LOC112530458/gene-LOC121107720/gene-LOC121107724/gene-LOC121107725/gene-MAN2A1/gene-PCNT/gene-RRN3/gene-TCTN3/gene-TMEM231
GO:2001242	regulation of intrinsic apoptotic signaling pathway	9/257	133/10946	2.88	0.00408797	0.282739	gene-G2E3/gene-LOC107055318/gene-LOC107055319/gene-LOC112530458/gene-LOC121107720/gene-LOC121107724/gene-LOC121107725/gene-RRN3/gene-SNAI1
GO:0048872	homeostasis of number of cells	11/257	185/10946	2.53	0.00426405	0.282739	gene-CHST4/gene-G2E3/gene-LOC107055318/gene-LOC107055319/gene-LOC112530458/gene-LOC121107720/gene-LOC121107724/gene-LOC121107725/gene-RRN3/gene-UBAP2/gene-ZFYVE16
GO:0016331	morphogenesis of embryonic epithelium	11/257	186/10946	2.52	0.00444045	0.282739	gene-CNTNAP1/gene-CNTNAP2/gene-DLC1/gene-EGFR/gene-FER/gene-GRHL3/gene-KDM2A/gene-LLGL2/gene-PGF/gene-TCTN3/gene-ZNF821
GO:0033138	positive regulation of peptidyl-serine phosphorylation	4/257	29/10946	5.87	0.00444158	0.282739	gene-NRXN3/gene-NTF3/gene-PCNT/gene-TERF2IP
GO:0048880	sensory system development	4/257	29/10946	5.87	0.00444158	0.282739	gene-LLGL2/gene-SLC44A5/gene-TMEM132A/gene-WWTR1
GO:0048925	lateral line system development	4/257	29/10946	5.87	0.00444158	0.282739	gene-LLGL2/gene-SLC44A5/gene-TMEM132A/gene-WWTR1
GO:0018992	germ-line sex determination	7/257	88/10946	3.39	0.00456941	0.282739	gene-G2E3/gene-LOC107055318/gene-LOC107055319/gene-LOC112530458/gene-LOC121107720/gene-LOC121107724/gene-LOC121107725
GO:0038128	ERBB2 signaling pathway	3/257	15/10946	8.52	0.00472199	0.282739	gene-GRB2/gene-NRG2/gene-SHC3
GO:0030238	male sex determination	7/257	89/10946	3.35	0.00486271	0.282739	gene-G2E3/gene-LOC107055318/gene-LOC107055319/gene-LOC112530458/gene-LOC121107720/gene-LOC121107724/gene-LOC121107725
GO:0048134	germ-line cyst formation	7/257	89/10946	3.35	0.00486271	0.282739	gene-G2E3/gene-LOC107055318/gene-LOC107055319/gene-LOC112530458/gene-LOC121107720/gene-LOC121107724/gene-LOC121107725
GO:0019991	septate junction assembly	4/257	30/10946	5.68	0.00503189	0.282739	gene-CNTNAP1/gene-CNTNAP2/gene-LLGL2/gene-MPP2
GO:1901983	regulation of protein acetylation	4/257	30/10946	5.68	0.00503189	0.282739	gene-BRCA1/gene-SLF1/gene-SNAI1/gene-TERF2IP
GO:0007530	sex determination	8/257	115/10946	2.96	0.00564368	0.308604	gene-G2E3/gene-LOC107055318/gene-LOC107055319/gene-LOC112530458/gene-LOC121107720/gene-LOC121107724/gene-LOC121107725/gene-TCF4
GO:0035329	hippo signaling	3/257	16/10946	7.99	0.00571189	0.308604	gene-TEAD1/gene-TEAD4/gene-WWTR1
GO:0097479	synaptic vesicle localization	6/257	71/10946	3.6	0.00632811	0.335446	gene-APBA1/gene-CNTNAP1/gene-CNTNAP2/gene-LLGL2/gene-NRXN3/gene-SNAP29
GO:0006298	mismatch repair	3/257	17/10946	7.52	0.00681691	0.347517	gene-MLH3/gene-MSH3/gene-MSH4
GO:0031280	negative regulation of cyclase activity	3/257	17/10946	7.52	0.00681691	0.347517	gene-AKAP6/gene-MRGPRH/gene-PCNT
GO:0007538	primary sex determination	7/257	95/10946	3.14	0.00692989	0.347517	gene-G2E3/gene-LOC107055318/gene-LOC107055319/gene-LOC112530458/gene-LOC121107720/gene-LOC121107724/gene-LOC121107725
GO:0007409	axonogenesis	19/257	436/10946	1.86	0.00706586	0.347517	gene-APBB3/gene-CDH10/gene-FER/gene-FEZ1/gene-FLRT2/gene-GPC2/gene-GRB2/gene-KDM4B/gene-LLGL2/gene-MAP1A/gene-NRXN3/gene-NTF3/gene-SEMA4D/gene-SHC3/gene-SSH3/gene-TCTN3/gene-TENM3/gene-WNK4/gene-ZNF821
GO:0099643	signal release from synapse	6/257	73/10946	3.5	0.00723624	0.347517	gene-APBA1/gene-CNTNAP1/gene-CNTNAP2/gene-LLGL2/gene-NRXN3/gene-SNAP29
GO:1902532	negative regulation of intracellular signal transduction	18/257	408/10946	1.88	0.00765995	0.347517	gene-DLC1/gene-FAM65C/gene-FLRT2/gene-G2E3/gene-HDAC9/gene-LOC107055318/gene-LOC107055319/gene-LOC112530458/gene-LOC121107720/gene-LOC121107724/gene-LOC121107725/gene-PHLPP2/gene-RRN3/gene-SNAI1/gene-TNFAIP8L1/gene-UBAP2/gene-WNK4/gene-ZNF821
GO:0007173	epidermal growth factor receptor signaling pathway	5/257	53/10946	4.02	0.00786306	0.347517	gene-DLC1/gene-EGFR/gene-FER/gene-GRB2/gene-SHC3
GO:0043297	apical junction assembly	5/257	53/10946	4.02	0.00786306	0.347517	gene-CNTNAP1/gene-CNTNAP2/gene-GRHL3/gene-LLGL2/gene-MPP2
GO:0061564	axon development	20/257	473/10946	1.8	0.0079687	0.347517	gene-APBB3/gene-CDH10/gene-CHST4/gene-FER/gene-FEZ1/gene-FLRT2/gene-GPC2/gene-GRB2/gene-KDM4B/gene-LLGL2/gene-MAP1A/gene-NRXN3/gene-NTF3/gene-SEMA4D/gene-SHC3/gene-SSH3/gene-TCTN3/gene-TENM3/gene-WNK4/gene-ZNF821
GO:0051350	negative regulation of lyase activity	3/257	18/10946	7.1	0.00804017	0.347517	gene-AKAP6/gene-MRGPRH/gene-PCNT
GO:0099172	presynapse organization	3/257	18/10946	7.1	0.00804017	0.347517	gene-CNTNAP1/gene-CNTNAP2/gene-NRXN3
GO:1901381	positive regulation of potassium ion transmembrane transport	3/257	18/10946	7.1	0.00804017	0.347517	gene-AKAP6/gene-PCNT/gene-WNK4
GO:0051640	organelle localization	16/257	353/10946	1.93	0.00913163	0.366181	gene-APBA1/gene-BECN1/gene-CNTNAP1/gene-CNTNAP2/gene-DLC1/gene-FAM65C/gene-LLGL2/gene-LOC121106525/gene-MAP1A/gene-NRXN3/gene-PCNT/gene-PLIN3/gene-SNAP29/gene-SSH3/gene-TCTN3/gene-TMEM216
GO:0016079	synaptic vesicle exocytosis	5/257	55/10946	3.87	0.00917898	0.366181	gene-APBA1/gene-CNTNAP1/gene-CNTNAP2/gene-LLGL2/gene-SNAP29
GO:0031058	positive regulation of histone modification	5/257	55/10946	3.87	0.00917898	0.366181	gene-BRCA1/gene-GCFC2/gene-KDM2A/gene-SNAI1/gene-WWTR1
GO:0098916	anterograde trans-synaptic signaling	14/257	293/10946	2.04	0.00930954	0.366181	gene-APBA1/gene-CDH10/gene-CNTNAP1/gene-CNTNAP2/gene-DLC1/gene-LLGL2/gene-MPP2/gene-MRGPRH/gene-NRXN3/gene-NTF3/gene-PCNT/gene-SHC3/gene-SNAP29/gene-TENM3
GO:0010591	regulation of lamellipodium assembly	3/257	19/10946	6.72	0.00938434	0.366181	gene-FER/gene-HDAC9/gene-SSH3
GO:0060711	labyrinthine layer development	3/257	19/10946	6.72	0.00938434	0.366181	gene-GRB2/gene-GRHL3/gene-LLGL2
GO:0061343	cell adhesion involved in heart morphogenesis	3/257	19/10946	6.72	0.00938434	0.366181	gene-CNTNAP1/gene-CNTNAP2/gene-FLRT2
GO:0007269	neurotransmitter secretion	6/257	78/10946	3.28	0.00991371	0.376383	gene-APBA1/gene-CNTNAP1/gene-CNTNAP2/gene-LLGL2/gene-NRXN3/gene-SNAP29
GO:0099504	synaptic vesicle cycle	6/257	78/10946	3.28	0.00991371	0.376383	gene-APBA1/gene-CNTNAP1/gene-CNTNAP2/gene-LLGL2/gene-NRXN3/gene-SNAP29
GO:0007416	synapse assembly	7/257	102/10946	2.92	0.0100943	0.378131	gene-ADGRL2/gene-CNTNAP1/gene-CNTNAP2/gene-MAP1A/gene-NRXN3/gene-SEMA4D/gene-TENM3
GO:0140029	exocytic process	5/257	57/10946	3.74	0.0106394	0.385919	gene-APBA1/gene-CNTNAP1/gene-CNTNAP2/gene-LLGL2/gene-SNAP29
GO:0006641	triglyceride metabolic process	4/257	37/10946	4.6	0.0106719	0.385919	gene-CERS4/gene-G6PC/gene-LBFABP/gene-PLIN3
GO:0016080	synaptic vesicle targeting	3/257	20/10946	6.39	0.0108517	0.385919	gene-APBA1/gene-CNTNAP1/gene-CNTNAP2
GO:1901985	positive regulation of protein acetylation	3/257	20/10946	6.39	0.0108517	0.385919	gene-BRCA1/gene-SNAI1/gene-TERF2IP
GO:0008366	axon ensheathment	5/257	58/10946	3.67	0.011426	0.401262	gene-CD9/gene-CNTNAP1/gene-CNTNAP2/gene-NTF3/gene-TENM3
GO:0071277	cellular response to calcium ion	4/257	38/10946	4.48	0.0117124	0.401934	gene-NRXN3/gene-SYT7/gene-SYT9/gene-WNK4
GO:0001709	cell fate determination	7/257	105/10946	2.84	0.0117312	0.401934	gene-EGFR/gene-GRHL3/gene-LLGL2/gene-NTF3/gene-TCF4/gene-ZFYVE16/gene-ZNF821
GO:0007272	ensheathment of neurons	5/257	59/10946	3.61	0.0122513	0.402896	gene-CD9/gene-CNTNAP1/gene-CNTNAP2/gene-NTF3/gene-TENM3
GO:0000726	non-recombinational repair	3/257	21/10946	6.08	0.0124443	0.402896	gene-BRCA1/gene-KDM2A/gene-TP53BP1
GO:0035065	regulation of histone acetylation	3/257	21/10946	6.08	0.0124443	0.402896	gene-BRCA1/gene-SLF1/gene-SNAI1
GO:0048916	posterior lateral line development	3/257	21/10946	6.08	0.0124443	0.402896	gene-LLGL2/gene-TMEM132A/gene-WWTR1
GO:0048593	camera-type eye morphogenesis	8/257	132/10946	2.58	0.0125324	0.402896	gene-DIO2/gene-KDM2A/gene-LOC121108310/gene-MAN2A1/gene-MEGF10/gene-PROX2/gene-SLC4A9/gene-TENM3
GO:0010639	negative regulation of organelle organization	11/257	215/10946	2.18	0.0126197	0.402896	gene-ANKHD1/gene-BECN1/gene-BRCA1/gene-DLC1/gene-FEZ1/gene-KDM4B/gene-MAP1A/gene-PATL1/gene-SLF1/gene-SSH3/gene-TERF2IP
GO:0051656	establishment of organelle localization	12/257	246/10946	2.08	0.0133421	0.410226	gene-APBA1/gene-BECN1/gene-CNTNAP1/gene-CNTNAP2/gene-DLC1/gene-FAM65C/gene-LLGL2/gene-LOC121106525/gene-MAP1A/gene-PLIN3/gene-SNAP29/gene-SSH3
GO:0008039	synaptic target recognition	4/257	40/10946	4.26	0.0139835	0.410226	gene-CNTNAP1/gene-CNTNAP2/gene-SEMA4D/gene-TENM3
GO:0031060	regulation of histone methylation	4/257	40/10946	4.26	0.0139835	0.410226	gene-BRCA1/gene-GCFC2/gene-KDM4B/gene-WWTR1
GO:0035151	regulation of tube size, open tracheal system	4/257	40/10946	4.26	0.0139835	0.410226	gene-CNTNAP1/gene-CNTNAP2/gene-GRHL3/gene-MPP2
GO:0019318	hexose metabolic process	5/257	61/10946	3.49	0.0140212	0.410226	gene-CHST6/gene-G6PC/gene-MAN2A1/gene-MRGPRH/gene-SLC25A1
GO:0016081	synaptic vesicle docking	3/257	22/10946	5.81	0.0141635	0.410226	gene-APBA1/gene-CNTNAP1/gene-CNTNAP2
GO:0031057	negative regulation of histone modification	3/257	22/10946	5.81	0.0141635	0.410226	gene-BRCA1/gene-KDM4B/gene-SLF1
GO:0035160	maintenance of epithelial integrity, open tracheal system	3/257	22/10946	5.81	0.0141635	0.410226	gene-DLC1/gene-EGFR/gene-ZNF821
GO:0071709	membrane assembly	3/257	22/10946	5.81	0.0141635	0.410226	gene-CNTNAP1/gene-CNTNAP2/gene-NRXN3
GO:1902275	regulation of chromatin organization	7/257	110/10946	2.71	0.0148734	0.426391	gene-BRCA1/gene-GCFC2/gene-KDM2A/gene-KDM4B/gene-SLF1/gene-SNAI1/gene-WWTR1
GO:0033135	regulation of peptidyl-serine phosphorylation	4/257	41/10946	4.16	0.0152166	0.431824	gene-NRXN3/gene-NTF3/gene-PCNT/gene-TERF2IP
GO:0099537	trans-synaptic signaling	14/257	312/10946	1.91	0.0154694	0.433031	gene-APBA1/gene-CDH10/gene-CNTNAP1/gene-CNTNAP2/gene-DLC1/gene-LLGL2/gene-MPP2/gene-MRGPRH/gene-NRXN3/gene-NTF3/gene-PCNT/gene-SHC3/gene-SNAP29/gene-TENM3
GO:0006836	neurotransmitter transport	7/257	111/10946	2.69	0.0155674	0.433031	gene-APBA1/gene-CNTNAP1/gene-CNTNAP2/gene-LLGL2/gene-NRXN3/gene-SLC44A5/gene-SNAP29
GO:0050918	positive chemotaxis	3/257	23/10946	5.56	0.0160107	0.437355	gene-NTF3/gene-PGF/gene-TENM3
GO:0048863	stem cell differentiation	8/257	138/10946	2.47	0.0160342	0.437355	gene-EGFR/gene-GRHL3/gene-NRG2/gene-NTF3/gene-SHC3/gene-SNAI1/gene-TCF4/gene-ZFYVE16
GO:0010507	negative regulation of autophagy	4/257	42/10946	4.06	0.0165161	0.446169	gene-ANKHD1/gene-BECN1/gene-FEZ1/gene-KDM4B
GO:0099536	synaptic signaling	14/257	315/10946	1.89	0.0166765	0.446213	gene-APBA1/gene-CDH10/gene-CNTNAP1/gene-CNTNAP2/gene-DLC1/gene-LLGL2/gene-MPP2/gene-MRGPRH/gene-NRXN3/gene-NTF3/gene-PCNT/gene-SHC3/gene-SNAP29/gene-TENM3
GO:0072091	regulation of stem cell proliferation	5/257	64/10946	3.33	0.0169862	0.45021	gene-HDAC9/gene-LLGL2/gene-PGF/gene-SNAI1/gene-WWTR1
GO:0033044	regulation of chromosome organization	10/257	196/10946	2.17	0.017299	0.452684	gene-BECN1/gene-BRCA1/gene-DLC1/gene-GCFC2/gene-KDM2A/gene-KDM4B/gene-SLF1/gene-SNAI1/gene-TERF2IP/gene-WWTR1
GO:0006303	double-strand break repair via nonhomologous end joining	3/257	24/10946	5.32	0.0179868	0.452684	gene-BRCA1/gene-KDM2A/gene-TP53BP1
GO:0016334	establishment or maintenance of polarity of follicular epithelium	3/257	24/10946	5.32	0.0179868	0.452684	gene-EGFR/gene-LLGL2/gene-UBAP2
GO:0060117	auditory receptor cell development	3/257	24/10946	5.32	0.0179868	0.452684	gene-FAM65C/gene-SLC4A9/gene-TMEM132A
GO:0042490	mechanoreceptor differentiation	5/257	65/10946	3.28	0.0180601	0.452684	gene-FAM65C/gene-NTF3/gene-SLC44A5/gene-SLC4A9/gene-TMEM132A
GO:0140056	organelle localization by membrane tethering	6/257	89/10946	2.87	0.0181531	0.452684	gene-APBA1/gene-CNTNAP1/gene-CNTNAP2/gene-PCNT/gene-TCTN3/gene-TMEM216
GO:0009895	negative regulation of catabolic process	9/257	169/10946	2.27	0.0182074	0.452684	gene-ANKHD1/gene-BECN1/gene-CERS4/gene-FEZ1/gene-GABARAPL2/gene-HDAC9/gene-KDM4B/gene-MAP1A/gene-PLIN3
GO:0022406	membrane docking	6/257	90/10946	2.84	0.0190805	0.46852	gene-APBA1/gene-CNTNAP1/gene-CNTNAP2/gene-PCNT/gene-TCTN3/gene-TMEM216
GO:0003015	heart process	5/257	66/10946	3.23	0.0191779	0.46852	gene-CNTNAP1/gene-CNTNAP2/gene-EGFR/gene-SGCZ/gene-WWTR1
GO:0007507	heart development	17/257	419/10946	1.73	0.0200564	0.476212	gene-BECN1/gene-CNTNAP1/gene-CNTNAP2/gene-DLC1/gene-FLRT2/gene-GRHL3/gene-HDAC9/gene-KDM2A/gene-MRGPRH/gene-NRG2/gene-PCNT/gene-PROX2/gene-SGCZ/gene-SHC3/gene-SNAI1/gene-TENM3/gene-WWTR1
GO:0031062	positive regulation of histone methylation	3/257	25/10946	5.11	0.0200923	0.476212	gene-BRCA1/gene-GCFC2/gene-WWTR1
GO:2000756	regulation of peptidyl-lysine acetylation	3/257	25/10946	5.11	0.0200923	0.476212	gene-BRCA1/gene-SLF1/gene-SNAI1
GO:0048489	synaptic vesicle transport	5/257	67/10946	3.18	0.0203402	0.476212	gene-APBA1/gene-CNTNAP1/gene-CNTNAP2/gene-LLGL2/gene-SNAP29
GO:0097480	establishment of synaptic vesicle localization	5/257	67/10946	3.18	0.0203402	0.476212	gene-APBA1/gene-CNTNAP1/gene-CNTNAP2/gene-LLGL2/gene-SNAP29
GO:0006638	neutral lipid metabolic process	4/257	45/10946	3.79	0.0208234	0.47953	gene-CERS4/gene-G6PC/gene-LBFABP/gene-PLIN3
GO:0006639	acylglycerol metabolic process	4/257	45/10946	3.79	0.0208234	0.47953	gene-CERS4/gene-G6PC/gene-LBFABP/gene-PLIN3
GO:0008069	dorsal/ventral axis specification, ovarian follicular epithelium	2/257	10/10946	8.52	0.0218217	0.486568	gene-EGFR/gene-UBAP2
GO:0045947	negative regulation of translational initiation	2/257	10/10946	8.52	0.0218217	0.486568	gene-EIF4EBP3/gene-PATL1
GO:1902459	positive regulation of stem cell population maintenance	2/257	10/10946	8.52	0.0218217	0.486568	gene-KDM2A/gene-WWTR1
GO:1903651	positive regulation of cytoplasmic transport	2/257	10/10946	8.52	0.0218217	0.486568	gene-BECN1/gene-RUNDC1
GO:0007424	open tracheal system development	9/257	175/10946	2.19	0.022281	0.490073	gene-CNTNAP1/gene-CNTNAP2/gene-DLC1/gene-EGFR/gene-GRHL3/gene-KDM4B/gene-MPP2/gene-SHC3/gene-ZNF821
GO:0045761	regulation of adenylate cyclase activity	3/257	26/10946	4.91	0.0223278	0.490073	gene-AKAP6/gene-MRGPRH/gene-PCNT
GO:0016569	covalent chromatin modification	8/257	147/10946	2.32	0.0225404	0.490905	gene-APBB3/gene-CCNO/gene-HDAC9/gene-KDM2A/gene-KDM4B/gene-LOC107049269/gene-LOC124416955/gene-SLF1
GO:0005996	monosaccharide metabolic process	5/257	69/10946	3.09	0.0228011	0.492761	gene-CHST6/gene-G6PC/gene-MAN2A1/gene-MRGPRH/gene-SLC25A1
GO:0008037	cell recognition	9/257	176/10946	2.18	0.0230187	0.493668	gene-CNTNAP1/gene-CNTNAP2/gene-FAM151B/gene-FAM151BL/gene-FEZ1/gene-MEGF10/gene-SEMA4D/gene-TENM3/gene-UBAP2
GO:0051147	regulation of muscle cell differentiation	6/257	95/10946	2.69	0.0242039	0.499249	gene-AKAP6/gene-ANKHD1/gene-FAM65C/gene-HDAC9/gene-MEGF10/gene-NRG2
GO:0044091	membrane biogenesis	3/257	27/10946	4.73	0.0246932	0.499249	gene-CNTNAP1/gene-CNTNAP2/gene-NRXN3
GO:0055023	positive regulation of cardiac muscle tissue growth	3/257	27/10946	4.73	0.0246932	0.499249	gene-AKAP6/gene-NRG2/gene-WWTR1
GO:1905268	negative regulation of chromatin organization	3/257	27/10946	4.73	0.0246932	0.499249	gene-BRCA1/gene-KDM4B/gene-SLF1
GO:2000036	regulation of stem cell population maintenance	3/257	27/10946	4.73	0.0246932	0.499249	gene-KDM2A/gene-KDM4B/gene-WWTR1
GO:0051962	positive regulation of nervous system development	18/257	463/10946	1.66	0.0248784	0.499249	gene-ADGRL2/gene-APBB3/gene-FAM151B/gene-FAM151BL/gene-FER/gene-FLRT2/gene-KDM4B/gene-MAN2A1/gene-MAP1A/gene-NRG2/gene-NRXN3/gene-NTF3/gene-PGF/gene-RRN3/gene-SHC3/gene-TCF4/gene-TENM3/gene-WWTR1
GO:0016570	histone modification	8/257	150/10946	2.27	0.0250723	0.499249	gene-APBB3/gene-CCNO/gene-HDAC9/gene-KDM2A/gene-KDM4B/gene-LOC107049269/gene-LOC124416955/gene-SLF1
GO:0007268	chemical synaptic transmission	14/257	333/10946	1.79	0.0254951	0.499249	gene-APBA1/gene-CDH10/gene-CNTNAP1/gene-CNTNAP2/gene-DLC1/gene-LLGL2/gene-MPP2/gene-MRGPRH/gene-NRXN3/gene-NTF3/gene-PCNT/gene-SHC3/gene-SNAP29/gene-TENM3
GO:0021700	developmental maturation	11/257	240/10946	1.95	0.026218	0.499249	gene-ANKHD1/gene-BECN1/gene-CNTNAP1/gene-CNTNAP2/gene-EGFR/gene-GPC2/gene-IFIH1/gene-LLGL2/gene-MAP1A/gene-NRXN3/gene-RUNDC1
GO:0008052	sensory organ boundary specification	2/257	11/10946	7.74	0.0262631	0.499249	gene-GPC2/gene-NTF3
GO:0019319	hexose biosynthetic process	2/257	11/10946	7.74	0.0262631	0.499249	gene-G6PC/gene-SLC25A1
GO:0035212	cell competition in a multicellular organism	2/257	11/10946	7.74	0.0262631	0.499249	gene-LLGL2/gene-WWTR1
GO:0045026	plasma membrane fusion	2/257	11/10946	7.74	0.0262631	0.499249	gene-CD9/gene-SNAP29
GO:0046364	monosaccharide biosynthetic process	2/257	11/10946	7.74	0.0262631	0.499249	gene-G6PC/gene-SLC25A1
GO:0043010	camera-type eye development	12/257	272/10946	1.88	0.0269403	0.499249	gene-DIO2/gene-GRHL3/gene-KDM2A/gene-LOC121108310/gene-MAN2A1/gene-MEGF10/gene-PCNT/gene-PROX2/gene-SLC4A9/gene-TENM3/gene-TMEM231/gene-WWTR1
GO:0031116	positive regulation of microtubule polymerization	3/257	28/10946	4.56	0.0271884	0.499249	gene-FER/gene-MAP1A/gene-PCNT
GO:0035010	encapsulation of foreign target	3/257	28/10946	4.56	0.0271884	0.499249	gene-ARHGEF5/gene-MAN2A1/gene-SHC3
GO:0046426	negative regulation of receptor signaling pathway via JAK-STAT	3/257	28/10946	4.56	0.0271884	0.499249	gene-FLRT2/gene-UBAP2/gene-ZNF821
GO:0048881	mechanosensory lateral line system development	3/257	28/10946	4.56	0.0271884	0.499249	gene-LLGL2/gene-TMEM132A/gene-WWTR1
GO:0048915	posterior lateral line system development	3/257	28/10946	4.56	0.0271884	0.499249	gene-LLGL2/gene-TMEM132A/gene-WWTR1
GO:1902743	regulation of lamellipodium organization	3/257	28/10946	4.56	0.0271884	0.499249	gene-FER/gene-HDAC9/gene-SSH3
GO:1904893	negative regulation of receptor signaling pathway via STAT	3/257	28/10946	4.56	0.0271884	0.499249	gene-FLRT2/gene-UBAP2/gene-ZNF821
GO:2001237	negative regulation of extrinsic apoptotic signaling pathway	4/257	49/10946	3.48	0.0275497	0.502598	gene-BRCA1/gene-NRG2/gene-SNAI1/gene-WWTR1
GO:0051301	cell division	12/257	274/10946	1.87	0.0282968	0.512889	gene-CKS2/gene-DLC1/gene-G2E3/gene-GPC2/gene-LLGL2/gene-LOC107055318/gene-LOC107055319/gene-LOC112530458/gene-LOC121107720/gene-LOC121107724/gene-LOC121107725/gene-ZFYVE16
GO:1903034	regulation of response to wounding	7/257	126/10946	2.37	0.0288988	0.512889	gene-BECN1/gene-CD9/gene-CERS4/gene-EGFR/gene-GRHL3/gene-NRG2/gene-SHC3
GO:2001252	positive regulation of chromosome organization	6/257	99/10946	2.58	0.0289113	0.512889	gene-BECN1/gene-BRCA1/gene-GCFC2/gene-KDM2A/gene-SNAI1/gene-WWTR1
GO:0060042	retina morphogenesis in camera-type eye	5/257	74/10946	2.88	0.029772	0.512889	gene-DIO2/gene-LOC121108310/gene-MAN2A1/gene-MEGF10/gene-SLC4A9
GO:0010669	epithelial structure maintenance	3/257	29/10946	4.41	0.029813	0.512889	gene-DLC1/gene-EGFR/gene-ZNF821
GO:0043268	positive regulation of potassium ion transport	3/257	29/10946	4.41	0.029813	0.512889	gene-AKAP6/gene-PCNT/gene-WNK4
GO:0060421	positive regulation of heart growth	3/257	29/10946	4.41	0.029813	0.512889	gene-AKAP6/gene-NRG2/gene-WWTR1
GO:0097485	neuron projection guidance	14/257	341/10946	1.75	0.0303719	0.512889	gene-APBB3/gene-FER/gene-FEZ1/gene-FLRT2/gene-GPC2/gene-GRB2/gene-KDM4B/gene-NRXN3/gene-NTF3/gene-SEMA4D/gene-SHC3/gene-TENM3/gene-WNK4/gene-ZNF821
GO:0003299	muscle hypertrophy in response to stress	2/257	12/10946	7.1	0.0310347	0.512889	gene-HDAC9/gene-KDM4B
GO:0006044	N-acetylglucosamine metabolic process	2/257	12/10946	7.1	0.0310347	0.512889	gene-CHST4/gene-CHST6
GO:0006929	substrate-dependent cell migration	2/257	12/10946	7.1	0.0310347	0.512889	gene-PGF/gene-SNAI1
GO:0008214	protein dealkylation	2/257	12/10946	7.1	0.0310347	0.512889	gene-KDM2A/gene-KDM4B
GO:0014898	cardiac muscle hypertrophy in response to stress	2/257	12/10946	7.1	0.0310347	0.512889	gene-HDAC9/gene-KDM4B
GO:0016577	histone demethylation	2/257	12/10946	7.1	0.0310347	0.512889	gene-KDM2A/gene-KDM4B
GO:0070076	histone lysine demethylation	2/257	12/10946	7.1	0.0310347	0.512889	gene-KDM2A/gene-KDM4B
GO:1901018	positive regulation of potassium ion transmembrane transporter activity	2/257	12/10946	7.1	0.0310347	0.512889	gene-AKAP6/gene-PCNT
GO:1905269	positive regulation of chromatin organization	5/257	75/10946	2.84	0.0313103	0.513647	gene-BRCA1/gene-GCFC2/gene-KDM2A/gene-SNAI1/gene-WWTR1
GO:0010720	positive regulation of cell development	17/257	442/10946	1.64	0.0314462	0.513647	gene-AKAP6/gene-APBB3/gene-FAM151B/gene-FAM151BL/gene-FER/gene-KDM4B/gene-MAN2A1/gene-MAP1A/gene-NRG2/gene-NTF3/gene-PGF/gene-RRN3/gene-SHC3/gene-TCF4/gene-TENM3/gene-WWTR1/gene-ZNF821
GO:0001944	vasculature development	12/257	279/10946	1.83	0.0319045	0.518121	gene-ANKHD1/gene-BECN1/gene-HDAC9/gene-LLGL2/gene-NRXN3/gene-PCNT/gene-PGF/gene-PROX2/gene-SHC3/gene-SLC4A9/gene-TMEM231/gene-WWTR1
GO:0031330	negative regulation of cellular catabolic process	7/257	130/10946	2.29	0.0334593	0.540248	gene-ANKHD1/gene-BECN1/gene-FEZ1/gene-GABARAPL2/gene-HDAC9/gene-KDM4B/gene-MAP1A
GO:0001700	embryonic development via the syncytial blastoderm	7/257	131/10946	2.28	0.0346703	0.545561	gene-CNTNAP1/gene-CNTNAP2/gene-DLC1/gene-EGFR/gene-FER/gene-LLGL2/gene-ZNF821
GO:0072358	cardiovascular system development	12/257	283/10946	1.81	0.0350203	0.545561	gene-ANKHD1/gene-BECN1/gene-HDAC9/gene-LLGL2/gene-NRXN3/gene-PCNT/gene-PGF/gene-PROX2/gene-SHC3/gene-SLC4A9/gene-TMEM231/gene-WWTR1
GO:1901379	regulation of potassium ion transmembrane transport	3/257	31/10946	4.12	0.035448	0.545561	gene-AKAP6/gene-PCNT/gene-WNK4
GO:0006482	protein demethylation	2/257	13/10946	6.55	0.0361186	0.545561	gene-KDM2A/gene-KDM4B
GO:0014012	peripheral nervous system axon regeneration	2/257	13/10946	6.55	0.0361186	0.545561	gene-CHST4/gene-MAP1A
GO:0031061	negative regulation of histone methylation	2/257	13/10946	6.55	0.0361186	0.545561	gene-BRCA1/gene-KDM4B
GO:0048919	posterior lateral line neuromast development	2/257	13/10946	6.55	0.0361186	0.545561	gene-LLGL2/gene-TMEM132A
GO:0050926	regulation of positive chemotaxis	2/257	13/10946	6.55	0.0361186	0.545561	gene-NTF3/gene-PGF
GO:0050927	positive regulation of positive chemotaxis	2/257	13/10946	6.55	0.0361186	0.545561	gene-NTF3/gene-PGF
GO:0051570	regulation of histone H3-K9 methylation	2/257	13/10946	6.55	0.0361186	0.545561	gene-BRCA1/gene-KDM4B
GO:0090051	negative regulation of cell migration involved in sprouting angiogenesis	2/257	13/10946	6.55	0.0361186	0.545561	gene-DLC1/gene-HDAC9
GO:0090129	positive regulation of synapse maturation	2/257	13/10946	6.55	0.0361186	0.545561	gene-ADGRL2/gene-NRXN3
GO:0022610	biological adhesion	16/257	417/10946	1.63	0.0369029	0.554427	gene-ADGRL2/gene-APBA1/gene-CD9/gene-CDH10/gene-CNTNAP1/gene-CNTNAP2/gene-DLC1/gene-EGFR/gene-FER/gene-FLRT2/gene-GRHL3/gene-MEGF10/gene-NRXN3/gene-SHC3/gene-TENM3/gene-VWF
GO:0006282	regulation of DNA repair	4/257	54/10946	3.15	0.0375877	0.555799	gene-APBB3/gene-BRCA1/gene-TERF2IP/gene-TP53BP1
GO:0018393	internal peptidyl-lysine acetylation	4/257	54/10946	3.15	0.0375877	0.555799	gene-APBB3/gene-HDAC9/gene-LOC107049269/gene-LOC124416955
GO:0018394	peptidyl-lysine acetylation	4/257	54/10946	3.15	0.0375877	0.555799	gene-APBB3/gene-HDAC9/gene-LOC107049269/gene-LOC124416955
GO:0038095	Fc-epsilon receptor signaling pathway	3/257	32/10946	3.99	0.0384565	0.562722	gene-FER/gene-GRB2/gene-SHC3
GO:0055025	positive regulation of cardiac muscle tissue development	3/257	32/10946	3.99	0.0384565	0.562722	gene-AKAP6/gene-NRG2/gene-WWTR1
GO:0007411	axon guidance	14/257	355/10946	1.68	0.0404997	0.569993	gene-APBB3/gene-FER/gene-FEZ1/gene-FLRT2/gene-GPC2/gene-GRB2/gene-KDM4B/gene-NRXN3/gene-NTF3/gene-SEMA4D/gene-SHC3/gene-TENM3/gene-WNK4/gene-ZNF821
GO:0046530	photoreceptor cell differentiation	9/257	195/10946	1.97	0.0405397	0.569993	gene-ANKHD1/gene-DIO2/gene-EGFR/gene-GRHL3/gene-KDM4B/gene-LOC121108310/gene-SLC4A9/gene-TENM3/gene-ZNF821
GO:0018205	peptidyl-lysine modification	7/257	136/10946	2.19	0.041161	0.569993	gene-APBB3/gene-HDAC9/gene-IFIH1/gene-LOC107049269/gene-LOC121108310/gene-LOC124416955/gene-SLF1
GO:0006094	gluconeogenesis	2/257	14/10946	6.08	0.0414978	0.569993	gene-G6PC/gene-SLC25A1
GO:0021682	nerve maturation	2/257	14/10946	6.08	0.0414978	0.569993	gene-CNTNAP1/gene-CNTNAP2
GO:0040003	chitin-based cuticle development	2/257	14/10946	6.08	0.0414978	0.569993	gene-GRHL3/gene-LLGL2
GO:0060857	establishment of glial blood-brain barrier	2/257	14/10946	6.08	0.0414978	0.569993	gene-CNTNAP1/gene-CNTNAP2
GO:0072553	terminal button organization	2/257	14/10946	6.08	0.0414978	0.569993	gene-CNTNAP1/gene-CNTNAP2
GO:0090128	regulation of synapse maturation	2/257	14/10946	6.08	0.0414978	0.569993	gene-ADGRL2/gene-NRXN3
GO:1902036	regulation of hematopoietic stem cell differentiation	2/257	14/10946	6.08	0.0414978	0.569993	gene-TCF4/gene-WWTR1
GO:1903649	regulation of cytoplasmic transport	2/257	14/10946	6.08	0.0414978	0.569993	gene-BECN1/gene-RUNDC1
GO:0016333	morphogenesis of follicular epithelium	3/257	33/10946	3.87	0.0415909	0.569993	gene-EGFR/gene-LLGL2/gene-UBAP2
GO:0048278	vesicle docking	3/257	33/10946	3.87	0.0415909	0.569993	gene-APBA1/gene-CNTNAP1/gene-CNTNAP2
GO:0051896	regulation of protein kinase B signaling	6/257	109/10946	2.34	0.0431997	0.589167	gene-GRB2/gene-MYDGF/gene-NRG2/gene-NRXN3/gene-PHLPP2/gene-PTEN
GO:0006475	internal protein amino acid acetylation	4/257	57/10946	2.99	0.0444936	0.603881	gene-APBB3/gene-HDAC9/gene-LOC107049269/gene-LOC124416955
GO:0071479	cellular response to ionizing radiation	3/257	34/10946	3.76	0.0448499	0.605792	gene-GRB2/gene-SNAI1/gene-WWTR1
GO:0000209	protein polyubiquitination	10/257	231/10946	1.84	0.045986	0.613345	gene-BRCA1/gene-G2E3/gene-LOC107055318/gene-LOC107055319/gene-LOC112530458/gene-LOC121107720/gene-LOC121107724/gene-LOC121107725/gene-LOC121108310/gene-RNF114
GO:0009251	glucan catabolic process	2/257	15/10946	5.68	0.0471556	0.613345	gene-BECN1/gene-G6PC
GO:0014887	cardiac muscle adaptation	2/257	15/10946	5.68	0.0471556	0.613345	gene-HDAC9/gene-KDM4B
GO:0016082	synaptic vesicle priming	2/257	15/10946	5.68	0.0471556	0.613345	gene-LLGL2/gene-SNAP29
GO:0035066	positive regulation of histone acetylation	2/257	15/10946	5.68	0.0471556	0.613345	gene-BRCA1/gene-SNAI1
GO:0036119	response to platelet-derived growth factor	2/257	15/10946	5.68	0.0471556	0.613345	gene-FER/gene-SNAI1
GO:0043652	engulfment of apoptotic cell	2/257	15/10946	5.68	0.0471556	0.613345	gene-BECN1/gene-MEGF10
GO:1901797	negative regulation of signal transduction by p53 class mediator	2/257	15/10946	5.68	0.0471556	0.613345	gene-RRN3/gene-SNAI1
GO:0010633	negative regulation of epithelial cell migration	3/257	35/10946	3.65	0.048232	0.616462	gene-DLC1/gene-HDAC9/gene-MCC
GO:0031112	positive regulation of microtubule polymerization or depolymerization	3/257	35/10946	3.65	0.048232	0.616462	gene-FER/gene-MAP1A/gene-PCNT
GO:0031279	regulation of cyclase activity	3/257	35/10946	3.65	0.048232	0.616462	gene-AKAP6/gene-MRGPRH/gene-PCNT
GO:0050769	positive regulation of neurogenesis	15/257	399/10946	1.6	0.0491999	0.616462	gene-APBB3/gene-FAM151B/gene-FAM151BL/gene-FER/gene-KDM4B/gene-MAN2A1/gene-MAP1A/gene-NRG2/gene-NTF3/gene-PGF/gene-RRN3/gene-SHC3/gene-TCF4/gene-TENM3/gene-WWTR1
GO:0010212	response to ionizing radiation	5/257	85/10946	2.51	0.0494355	0.616462	gene-BRCA1/gene-GRB2/gene-SNAI1/gene-VWF/gene-WWTR1
GO:0032273	positive regulation of protein polymerization	4/257	59/10946	2.89	0.049466	0.616462	gene-FER/gene-GRB2/gene-MAP1A/gene-PCNT
GO:0001754	eye photoreceptor cell differentiation	8/257	172/10946	1.98	0.0498921	0.616462	gene-ANKHD1/gene-DIO2/gene-EGFR/gene-GRHL3/gene-KDM4B/gene-LOC121108310/gene-SLC4A9/gene-TENM3
GO:0046486	glycerolipid metabolic process	9/257	204/10946	1.88	0.051362	0.616462	gene-CERS4/gene-DGKB/gene-G6PC/gene-GRB2/gene-LBFABP/gene-NRG2/gene-PLA2G4A/gene-PLIN3/gene-SLC44A5
GO:0042491	inner ear auditory receptor cell differentiation	3/257	36/10946	3.55	0.0517355	0.616462	gene-FAM65C/gene-SLC4A9/gene-TMEM132A
GO:0014013	regulation of gliogenesis	6/257	114/10946	2.24	0.0517538	0.616462	gene-CERS4/gene-KDM4B/gene-NRG2/gene-NTF3/gene-TENM3/gene-WWTR1
GO:0032388	positive regulation of intracellular transport	6/257	114/10946	2.24	0.0517538	0.616462	gene-BECN1/gene-BRCA1/gene-CPSF7/gene-FAM65C/gene-PCNT/gene-RUNDC1
GO:0005980	glycogen catabolic process	2/257	16/10946	5.32	0.0530762	0.616462	gene-BECN1/gene-G6PC
GO:0007202	activation of phospholipase C activity	2/257	16/10946	5.32	0.0530762	0.616462	gene-DLC1/gene-NTF3
GO:0007392	initiation of dorsal closure	2/257	16/10946	5.32	0.0530762	0.616462	gene-FER/gene-ZNF821
GO:0014855	striated muscle cell proliferation	2/257	16/10946	5.32	0.0530762	0.616462	gene-MEGF10/gene-TENM3
GO:0032148	activation of protein kinase B activity	2/257	16/10946	5.32	0.0530762	0.616462	gene-NRG2/gene-NTF3
GO:0042304	regulation of fatty acid biosynthetic process	2/257	16/10946	5.32	0.0530762	0.616462	gene-BRCA1/gene-PLA2G4A
GO:0044088	regulation of vacuole organization	2/257	16/10946	5.32	0.0530762	0.616462	gene-BECN1/gene-FEZ1
GO:0044247	cellular polysaccharide catabolic process	2/257	16/10946	5.32	0.0530762	0.616462	gene-BECN1/gene-G6PC
GO:0048011	neurotrophin TRK receptor signaling pathway	2/257	16/10946	5.32	0.0530762	0.616462	gene-GRB2/gene-NTF3
GO:0051569	regulation of histone H3-K4 methylation	2/257	16/10946	5.32	0.0530762	0.616462	gene-BRCA1/gene-WWTR1
GO:0060306	regulation of membrane repolarization	2/257	16/10946	5.32	0.0530762	0.616462	gene-AKAP6/gene-PCNT
GO:2000758	positive regulation of peptidyl-lysine acetylation	2/257	16/10946	5.32	0.0530762	0.616462	gene-BRCA1/gene-SNAI1
GO:0099003	vesicle-mediated transport in synapse	5/257	87/10946	2.45	0.0536691	0.616462	gene-APBA1/gene-CNTNAP1/gene-CNTNAP2/gene-LLGL2/gene-SNAP29
GO:0006473	protein acetylation	4/257	61/10946	2.79	0.054732	0.616462	gene-APBB3/gene-HDAC9/gene-LOC107049269/gene-LOC124416955
GO:0016573	histone acetylation	4/257	61/10946	2.79	0.054732	0.616462	gene-APBB3/gene-HDAC9/gene-LOC107049269/gene-LOC124416955
GO:2001251	negative regulation of chromosome organization	4/257	61/10946	2.79	0.054732	0.616462	gene-BRCA1/gene-KDM4B/gene-SLF1/gene-TERF2IP
GO:0035249	synaptic transmission, glutamatergic	3/257	37/10946	3.45	0.0553588	0.616462	gene-CDH10/gene-GRID2/gene-SHC3
GO:0051155	positive regulation of striated muscle cell differentiation	3/257	37/10946	3.45	0.0553588	0.616462	gene-AKAP6/gene-FAM65C/gene-NRG2
GO:0051339	regulation of lyase activity	3/257	37/10946	3.45	0.0553588	0.616462	gene-AKAP6/gene-MRGPRH/gene-PCNT
GO:0051897	positive regulation of protein kinase B signaling	5/257	88/10946	2.42	0.0558626	0.616462	gene-GRB2/gene-MYDGF/gene-NRG2/gene-NRXN3/gene-PHLPP2
GO:0090596	sensory organ morphogenesis	15/257	407/10946	1.57	0.0565609	0.616462	gene-ANKHD1/gene-DIO2/gene-EGFR/gene-FAM65C/gene-GRHL3/gene-KDM2A/gene-KDM4B/gene-LOC121108310/gene-MAN2A1/gene-MEGF10/gene-PROX2/gene-SLC44A5/gene-SLC4A9/gene-TENM3/gene-ZNF821
GO:0051648	vesicle localization	6/257	117/10946	2.18	0.0573494	0.616462	gene-APBA1/gene-CNTNAP1/gene-CNTNAP2/gene-LLGL2/gene-NRXN3/gene-SNAP29
GO:0022618	ribonucleoprotein complex assembly	4/257	62/10946	2.75	0.0574744	0.616462	gene-CPSF7/gene-IFIH1/gene-MRPS7/gene-PATL1
GO:0003007	heart morphogenesis	10/257	241/10946	1.77	0.0580552	0.616462	gene-CNTNAP1/gene-CNTNAP2/gene-DLC1/gene-FLRT2/gene-GRHL3/gene-KDM2A/gene-MRGPRH/gene-NRG2/gene-SNAI1/gene-WWTR1
GO:0010970	transport along microtubule	5/257	89/10946	2.39	0.0581072	0.616462	gene-APBA1/gene-FEZ1/gene-LOC121106525/gene-MAP1A/gene-PLIN3
GO:0099111	microtubule-based transport	5/257	89/10946	2.39	0.0581072	0.616462	gene-APBA1/gene-FEZ1/gene-LOC121106525/gene-MAP1A/gene-PLIN3
GO:0001892	embryonic placenta development	3/257	38/10946	3.36	0.0590999	0.616462	gene-GRB2/gene-GRHL3/gene-LLGL2
GO:0000272	polysaccharide catabolic process	2/257	17/10946	5.01	0.0592441	0.616462	gene-BECN1/gene-G6PC
GO:0007020	microtubule nucleation	2/257	17/10946	5.01	0.0592441	0.616462	gene-PCNT/gene-TUBGCP4
GO:0010738	regulation of protein kinase A signaling	2/257	17/10946	5.01	0.0592441	0.616462	gene-AKAP6/gene-NRXN3
GO:0014014	negative regulation of gliogenesis	2/257	17/10946	5.01	0.0592441	0.616462	gene-CERS4/gene-KDM4B
GO:0031954	positive regulation of protein autophosphorylation	2/257	17/10946	5.01	0.0592441	0.616462	gene-NRG2/gene-PGF
GO:0032288	myelin assembly	2/257	17/10946	5.01	0.0592441	0.616462	gene-CD9/gene-TENM3
GO:0033002	muscle cell proliferation	2/257	17/10946	5.01	0.0592441	0.616462	gene-MEGF10/gene-TENM3
GO:0035024	negative regulation of Rho protein signal transduction	2/257	17/10946	5.01	0.0592441	0.616462	gene-DLC1/gene-FAM65C
GO:0048680	positive regulation of axon regeneration	2/257	17/10946	5.01	0.0592441	0.616462	gene-NRG2/gene-SHC3
GO:0061726	mitochondrion disassembly	2/257	17/10946	5.01	0.0592441	0.616462	gene-BECN1/gene-GABARAPL2
GO:0070572	positive regulation of neuron projection regeneration	2/257	17/10946	5.01	0.0592441	0.616462	gene-NRG2/gene-SHC3
GO:0070593	dendrite self-avoidance	2/257	17/10946	5.01	0.0592441	0.616462	gene-FAM151B/gene-FAM151BL
GO:0097352	autophagosome maturation	2/257	17/10946	5.01	0.0592441	0.616462	gene-GABARAPL2/gene-SNAP29
GO:1901099	negative regulation of signal transduction in absence of ligand	2/257	17/10946	5.01	0.0592441	0.616462	gene-NRG2/gene-SNAI1
GO:2000785	regulation of autophagosome assembly	2/257	17/10946	5.01	0.0592441	0.616462	gene-BECN1/gene-FEZ1
GO:2001240	negative regulation of extrinsic apoptotic signaling pathway in absence of ligand	2/257	17/10946	5.01	0.0592441	0.616462	gene-NRG2/gene-SNAI1
GO:0045833	negative regulation of lipid metabolic process	4/257	63/10946	2.7	0.0602892	0.625022	gene-BRCA1/gene-CERS4/gene-PLIN3/gene-SNAI1
GO:0006302	double-strand break repair	5/257	91/10946	2.34	0.0627496	0.638541	gene-APBB3/gene-BRCA1/gene-KDM2A/gene-LOC121106525/gene-TP53BP1
GO:0005976	polysaccharide metabolic process	3/257	39/10946	3.28	0.0629569	0.638541	gene-BECN1/gene-CHST6/gene-G6PC
GO:0006903	vesicle targeting	3/257	39/10946	3.28	0.0629569	0.638541	gene-APBA1/gene-CNTNAP1/gene-CNTNAP2
GO:0008088	axo-dendritic transport	3/257	39/10946	3.28	0.0629569	0.638541	gene-APBA1/gene-FEZ1/gene-MAP1A
GO:0031113	regulation of microtubule polymerization	3/257	39/10946	3.28	0.0629569	0.638541	gene-FER/gene-MAP1A/gene-PCNT
GO:0060219	camera-type eye photoreceptor cell differentiation	3/257	39/10946	3.28	0.0629569	0.638541	gene-DIO2/gene-LOC121108310/gene-SLC4A9
GO:0008038	neuron recognition	7/257	150/10946	1.99	0.0633536	0.639293	gene-CNTNAP1/gene-CNTNAP2/gene-FAM151B/gene-FAM151BL/gene-FEZ1/gene-SEMA4D/gene-TENM3
GO:0032386	regulation of intracellular transport	8/257	181/10946	1.88	0.0634862	0.639293	gene-BECN1/gene-BRCA1/gene-CPSF7/gene-FAM65C/gene-FER/gene-MAP1A/gene-PCNT/gene-RUNDC1
GO:0018193	peptidyl-amino acid modification	14/257	380/10946	1.57	0.0641896	0.644068	gene-APBB3/gene-DPH6/gene-EGFR/gene-FER/gene-GRB2/gene-HDAC9/gene-IFIH1/gene-LOC107049269/gene-LOC121108310/gene-LOC124416955/gene-NRG2/gene-SHC3/gene-SLF1/gene-WNK4
GO:0048592	eye morphogenesis	13/257	346/10946	1.6	0.064451	0.644389	gene-ANKHD1/gene-DIO2/gene-EGFR/gene-GRHL3/gene-KDM2A/gene-KDM4B/gene-LOC121108310/gene-MAN2A1/gene-MEGF10/gene-PROX2/gene-SLC4A9/gene-TENM3/gene-ZNF821
GO:0038179	neurotrophin signaling pathway	2/257	18/10946	4.73	0.0656445	0.647111	gene-GRB2/gene-NTF3
GO:0044275	cellular carbohydrate catabolic process	2/257	18/10946	4.73	0.0656445	0.647111	gene-BECN1/gene-G6PC
GO:0060479	lung cell differentiation	2/257	18/10946	4.73	0.0656445	0.647111	gene-GRHL3/gene-WWTR1
GO:0060487	lung epithelial cell differentiation	2/257	18/10946	4.73	0.0656445	0.647111	gene-GRHL3/gene-WWTR1
GO:0051153	regulation of striated muscle cell differentiation	4/257	65/10946	2.62	0.0661345	0.649662	gene-AKAP6/gene-FAM65C/gene-HDAC9/gene-NRG2
GO:0046622	positive regulation of organ growth	3/257	40/10946	3.19	0.0669277	0.655162	gene-AKAP6/gene-NRG2/gene-WWTR1
GO:0120032	regulation of plasma membrane bounded cell projection assembly	6/257	122/10946	2.09	0.0674535	0.658017	gene-FAM65C/gene-FER/gene-HDAC9/gene-NRXN3/gene-SSH3/gene-TENM3
GO:0048813	dendrite morphogenesis	7/257	153/10946	1.95	0.0689012	0.669814	gene-FAM151B/gene-FAM151BL/gene-GPC2/gene-KDM4B/gene-MAP1A/gene-SEMA4D/gene-TENM3
GO:0021575	hindbrain morphogenesis	3/257	41/10946	3.12	0.0710102	0.680891	gene-DLC1/gene-NRXN3/gene-PCNT
GO:0048679	regulation of axon regeneration	3/257	41/10946	3.12	0.0710102	0.680891	gene-CERS4/gene-NRG2/gene-SHC3
GO:0055021	regulation of cardiac muscle tissue growth	3/257	41/10946	3.12	0.0710102	0.680891	gene-AKAP6/gene-NRG2/gene-WWTR1
GO:0072384	organelle transport along microtubule	3/257	41/10946	3.12	0.0710102	0.680891	gene-LOC121106525/gene-MAP1A/gene-PLIN3
GO:0001505	regulation of neurotransmitter levels	9/257	218/10946	1.76	0.0716931	0.681282	gene-APBA1/gene-ARHGEF5/gene-BAAT/gene-CNTNAP1/gene-CNTNAP2/gene-LLGL2/gene-NRXN3/gene-SLC44A5/gene-SNAP29
GO:0014003	oligodendrocyte development	2/257	19/10946	4.48	0.0722634	0.681282	gene-CD9/gene-TENM3
GO:0035307	positive regulation of protein dephosphorylation	2/257	19/10946	4.48	0.0722634	0.681282	gene-AKAP6/gene-DLC1
GO:0043537	negative regulation of blood vessel endothelial cell migration	2/257	19/10946	4.48	0.0722634	0.681282	gene-DLC1/gene-HDAC9
GO:0060856	establishment of blood-brain barrier	2/257	19/10946	4.48	0.0722634	0.681282	gene-CNTNAP1/gene-CNTNAP2
GO:0006470	protein dephosphorylation	5/257	95/10946	2.24	0.0726441	0.682581	gene-PHLPP2/gene-PTEN/gene-PTPRD/gene-PTPRS/gene-SSH3
GO:0008283	cell population proliferation	17/257	494/10946	1.47	0.073773	0.690545	gene-EGFR/gene-FER/gene-G2E3/gene-GRHL3/gene-LLGL2/gene-LOC107055318/gene-LOC107055319/gene-LOC112530458/gene-LOC121107720/gene-LOC121107724/gene-LOC121107725/gene-MEGF10/gene-NRG2/gene-PCNT/gene-RRN3/gene-TENM3/gene-WWTR1
GO:0060491	regulation of cell projection assembly	6/257	125/10946	2.04	0.0739832	0.690545	gene-FAM65C/gene-FER/gene-HDAC9/gene-NRXN3/gene-SSH3/gene-TENM3
GO:0070570	regulation of neuron projection regeneration	3/257	42/10946	3.04	0.075202	0.697987	gene-CERS4/gene-NRG2/gene-SHC3
GO:0000077	DNA damage checkpoint	4/257	68/10946	2.51	0.0754337	0.697987	gene-BRCA1/gene-RAD9A/gene-SLF1/gene-TP53BP1
GO:0007283	spermatogenesis	13/257	356/10946	1.56	0.0767599	0.697987	gene-CCNO/gene-CDH10/gene-CNTD1/gene-EGFR/gene-G2E3/gene-KDM2A/gene-LOC107055318/gene-LOC107055319/gene-LOC112530458/gene-LOC121107720/gene-LOC121107724/gene-LOC121107725/gene-PCNT
GO:0016236	macroautophagy	4/257	69/10946	2.47	0.0786726	0.697987	gene-BECN1/gene-GABARAPL2/gene-NBR1/gene-SNAP29
GO:2001236	regulation of extrinsic apoptotic signaling pathway	4/257	69/10946	2.47	0.0786726	0.697987	gene-BRCA1/gene-NRG2/gene-SNAI1/gene-WWTR1
GO:0007390	germ-band shortening	2/257	20/10946	4.26	0.0790869	0.697987	gene-EGFR/gene-ZNF821
GO:0010569	regulation of double-strand break repair via homologous recombination	2/257	20/10946	4.26	0.0790869	0.697987	gene-TERF2IP/gene-TP53BP1
GO:0016242	negative regulation of macroautophagy	2/257	20/10946	4.26	0.0790869	0.697987	gene-BECN1/gene-FEZ1
GO:0030857	negative regulation of epithelial cell differentiation	2/257	20/10946	4.26	0.0790869	0.697987	gene-GRHL3/gene-WWTR1
GO:0034110	regulation of homotypic cell-cell adhesion	2/257	20/10946	4.26	0.0790869	0.697987	gene-CD9/gene-TENM3
GO:0046856	phosphatidylinositol dephosphorylation	2/257	20/10946	4.26	0.0790869	0.697987	gene-INPP5A/gene-PTEN
GO:0060045	positive regulation of cardiac muscle cell proliferation	2/257	20/10946	4.26	0.0790869	0.697987	gene-NRG2/gene-WWTR1
GO:1901016	regulation of potassium ion transmembrane transporter activity	2/257	20/10946	4.26	0.0790869	0.697987	gene-AKAP6/gene-PCNT
GO:1901799	negative regulation of proteasomal protein catabolic process	2/257	20/10946	4.26	0.0790869	0.697987	gene-GABARAPL2/gene-MAP1A
GO:0032446	protein modification by small protein conjugation	13/257	358/10946	1.55	0.0793922	0.697987	gene-BRCA1/gene-G2E3/gene-HDAC9/gene-IFIH1/gene-KDM2A/gene-LOC107055318/gene-LOC107055319/gene-LOC112530458/gene-LOC121107720/gene-LOC121107724/gene-LOC121107725/gene-LOC121108310/gene-RNF114
GO:0006935	chemotaxis	15/257	428/10946	1.49	0.0793961	0.697987	gene-APBB3/gene-FER/gene-FEZ1/gene-FLRT2/gene-GPC2/gene-GRB2/gene-KDM4B/gene-NRXN3/gene-NTF3/gene-PGF/gene-SEMA4D/gene-SHC3/gene-TENM3/gene-WNK4/gene-ZNF821
GO:0016925	protein sumoylation	3/257	43/10946	2.97	0.0795009	0.697987	gene-HDAC9/gene-IFIH1/gene-LOC121108310
GO:0030168	platelet activation	3/257	43/10946	2.97	0.0795009	0.697987	gene-CD9/gene-MEGF10/gene-VWF
GO:0098722	asymmetric stem cell division	3/257	43/10946	2.97	0.0795009	0.697987	gene-GPC2/gene-LLGL2/gene-ZFYVE16
GO:0046620	regulation of organ growth	5/257	98/10946	2.17	0.0805931	0.705371	gene-AKAP6/gene-GPC2/gene-NRG2/gene-UBAP2/gene-WWTR1
GO:0007163	establishment or maintenance of cell polarity	10/257	257/10946	1.66	0.0813661	0.705643	gene-APBA1/gene-CNTNAP1/gene-CNTNAP2/gene-DLC1/gene-EGFR/gene-GRHL3/gene-LLGL2/gene-MAP1A/gene-UBAP2/gene-ZNF821
GO:0014015	positive regulation of gliogenesis	4/257	70/10946	2.43	0.08198	0.705643	gene-NRG2/gene-NTF3/gene-TENM3/gene-WWTR1
GO:0071826	ribonucleoprotein complex subunit organization	4/257	70/10946	2.43	0.08198	0.705643	gene-CPSF7/gene-IFIH1/gene-MRPS7/gene-PATL1
GO:0070647	protein modification by small protein conjugation or removal	15/257	431/10946	1.48	0.0830876	0.705643	gene-BECN1/gene-BRCA1/gene-CCNO/gene-G2E3/gene-HDAC9/gene-IFIH1/gene-KDM2A/gene-LOC107055318/gene-LOC107055319/gene-LOC112530458/gene-LOC121107720/gene-LOC121107724/gene-LOC121107725/gene-LOC121108310/gene-RNF114
GO:0060541	respiratory system development	11/257	292/10946	1.6	0.0832986	0.705643	gene-CNTNAP1/gene-CNTNAP2/gene-DLC1/gene-EGFR/gene-GRHL3/gene-KDM4B/gene-MAN2A1/gene-MPP2/gene-SHC3/gene-WWTR1/gene-ZNF821
GO:0030705	cytoskeleton-dependent intracellular transport	5/257	99/10946	2.15	0.0833421	0.705643	gene-APBA1/gene-FEZ1/gene-LOC121106525/gene-MAP1A/gene-PLIN3
GO:1902115	regulation of organelle assembly	5/257	99/10946	2.15	0.0833421	0.705643	gene-BECN1/gene-BRCA1/gene-FAM65C/gene-FEZ1/gene-PATL1
GO:0030718	germ-line stem cell population maintenance	3/257	44/10946	2.9	0.0839045	0.705643	gene-EGFR/gene-GPC2/gene-RRN3
GO:0003407	neural retina development	4/257	71/10946	2.4	0.0853551	0.705643	gene-DIO2/gene-LOC121108310/gene-MEGF10/gene-SLC4A9
GO:0009953	dorsal/ventral pattern formation	6/257	130/10946	1.97	0.0856402	0.705643	gene-EGFR/gene-GPC2/gene-TCTN3/gene-UBAP2/gene-WWTR1/gene-ZNF821
GO:0022613	ribonucleoprotein complex biogenesis	6/257	130/10946	1.97	0.0856402	0.705643	gene-CPSF7/gene-IFIH1/gene-MRPS7/gene-PATL1/gene-RRN3/gene-SRFBP1
GO:0010638	positive regulation of organelle organization	12/257	328/10946	1.56	0.0858519	0.705643	gene-BECN1/gene-BRCA1/gene-FER/gene-GCFC2/gene-GRB2/gene-KDM2A/gene-MAP1A/gene-NTF3/gene-PCNT/gene-PLA2G4A/gene-SNAI1/gene-WWTR1
GO:0010039	response to iron ion	2/257	21/10946	4.06	0.0861019	0.705643	gene-APBB3/gene-BECN1
GO:0010613	positive regulation of cardiac muscle hypertrophy	2/257	21/10946	4.06	0.0861019	0.705643	gene-AKAP6/gene-BECN1
GO:0014059	regulation of dopamine secretion	2/257	21/10946	4.06	0.0861019	0.705643	gene-SYT7/gene-SYT9
GO:0014742	positive regulation of muscle hypertrophy	2/257	21/10946	4.06	0.0861019	0.705643	gene-AKAP6/gene-BECN1
GO:0032878	regulation of establishment or maintenance of cell polarity	2/257	21/10946	4.06	0.0861019	0.705643	gene-FAM65C/gene-LLGL2
GO:0051181	obsolete cofactor transport	2/257	21/10946	4.06	0.0861019	0.705643	gene-GIF/gene-SLC44A5
GO:0097120	receptor localization to synapse	2/257	21/10946	4.06	0.0861019	0.705643	gene-APBA1/gene-NRXN3
GO:0099174	regulation of presynapse organization	2/257	21/10946	4.06	0.0861019	0.705643	gene-NRXN3/gene-TENM3
GO:1903859	regulation of dendrite extension	2/257	21/10946	4.06	0.0861019	0.705643	gene-FAM151B/gene-FAM151BL
GO:0008544	epidermis development	8/257	194/10946	1.76	0.0868532	0.705643	gene-FAM65C/gene-GRHL3/gene-LLGL2/gene-NTF3/gene-SLC44A5/gene-SLC4A9/gene-TMEM132A/gene-WWTR1
GO:0032103	positive regulation of response to external stimulus	8/257	194/10946	1.76	0.0868532	0.705643	gene-ANKHD1/gene-FAM65C/gene-NRG2/gene-NTF3/gene-PGF/gene-PLA2G4A/gene-SHC3/gene-SNAI1
GO:0006904	vesicle docking involved in exocytosis	3/257	45/10946	2.84	0.0884103	0.705643	gene-APBA1/gene-CNTNAP1/gene-CNTNAP2
GO:0007314	oocyte anterior/posterior axis specification	3/257	45/10946	2.84	0.0884103	0.705643	gene-EGFR/gene-IFIH1/gene-LLGL2
GO:0008358	maternal determination of anterior/posterior axis, embryo	3/257	45/10946	2.84	0.0884103	0.705643	gene-EGFR/gene-IFIH1/gene-LLGL2
GO:0008586	imaginal disc-derived wing vein morphogenesis	3/257	45/10946	2.84	0.0884103	0.705643	gene-DLC1/gene-EGFR/gene-GPC2
GO:0043502	regulation of muscle adaptation	3/257	45/10946	2.84	0.0884103	0.705643	gene-AKAP6/gene-BECN1/gene-HDAC9
GO:0045682	regulation of epidermis development	3/257	45/10946	2.84	0.0884103	0.705643	gene-FER/gene-GRHL3/gene-LLGL2
GO:0045844	positive regulation of striated muscle tissue development	3/257	45/10946	2.84	0.0884103	0.705643	gene-AKAP6/gene-NRG2/gene-WWTR1
GO:0060420	regulation of heart growth	3/257	45/10946	2.84	0.0884103	0.705643	gene-AKAP6/gene-NRG2/gene-WWTR1
GO:0003013	circulatory system process	9/257	228/10946	1.68	0.0889045	0.707578	gene-CNTNAP1/gene-CNTNAP2/gene-EGFR/gene-MRGPRH/gene-PGF/gene-SGCZ/gene-SHC3/gene-WNK4/gene-WWTR1
GO:2001020	regulation of response to DNA damage stimulus	5/257	102/10946	2.09	0.0918831	0.720088	gene-APBB3/gene-BRCA1/gene-SNAI1/gene-TERF2IP/gene-TP53BP1
GO:0008285	negative regulation of cell population proliferation	14/257	403/10946	1.48	0.0929493	0.720088	gene-BECN1/gene-CD9/gene-CERS4/gene-DLC1/gene-FAM65C/gene-HDAC9/gene-KDM2A/gene-LBFABP/gene-LLGL2/gene-MCC/gene-PGF/gene-PTEN/gene-SNAI1/gene-WNK4
GO:0003158	endothelium development	3/257	46/10946	2.78	0.0930158	0.720088	gene-DLC1/gene-NRG2/gene-PROX2
GO:1901863	positive regulation of muscle tissue development	3/257	46/10946	2.78	0.0930158	0.720088	gene-AKAP6/gene-NRG2/gene-WWTR1
GO:0002690	positive regulation of leukocyte chemotaxis	2/257	22/10946	3.87	0.0932958	0.720088	gene-FAM65C/gene-PGF
GO:0003300	cardiac muscle hypertrophy	2/257	22/10946	3.87	0.0932958	0.720088	gene-HDAC9/gene-KDM4B
GO:0014896	muscle hypertrophy	2/257	22/10946	3.87	0.0932958	0.720088	gene-HDAC9/gene-KDM4B
GO:0014897	striated muscle hypertrophy	2/257	22/10946	3.87	0.0932958	0.720088	gene-HDAC9/gene-KDM4B
GO:0045687	positive regulation of glial cell differentiation	2/257	22/10946	3.87	0.0932958	0.720088	gene-NTF3/gene-TENM3
GO:0060428	lung epithelium development	2/257	22/10946	3.87	0.0932958	0.720088	gene-GRHL3/gene-WWTR1
GO:0070988	demethylation	2/257	22/10946	3.87	0.0932958	0.720088	gene-KDM2A/gene-KDM4B
GO:0051054	positive regulation of DNA metabolic process	5/257	103/10946	2.07	0.0948268	0.7299	gene-APBB3/gene-BRCA1/gene-GRHL3/gene-SHC3/gene-TP53BP1
GO:0042461	photoreceptor cell development	6/257	134/10946	1.91	0.0956541	0.731945	gene-DIO2/gene-GRHL3/gene-KDM4B/gene-LOC121108310/gene-TENM3/gene-ZNF821
GO:0030856	regulation of epithelial cell differentiation	4/257	74/10946	2.3	0.0958786	0.731945	gene-FER/gene-GRHL3/gene-WWTR1/gene-ZNF821
GO:0043543	protein acylation	4/257	74/10946	2.3	0.0958786	0.731945	gene-APBB3/gene-HDAC9/gene-LOC107049269/gene-LOC124416955
GO:0031346	positive regulation of cell projection organization	11/257	300/10946	1.56	0.0961347	0.731945	gene-APBB3/gene-FAM151B/gene-FAM151BL/gene-FAM65C/gene-FER/gene-HDAC9/gene-MAP1A/gene-NRG2/gene-RRN3/gene-SHC3/gene-TENM3
GO:0010975	regulation of neuron projection development	15/257	442/10946	1.45	0.0975623	0.733219	gene-APBB3/gene-CERS4/gene-DLC1/gene-FAM151B/gene-FAM151BL/gene-FER/gene-FEZ1/gene-LOC121110409/gene-MAP1A/gene-NRG2/gene-RRN3/gene-SEMA4D/gene-SHC3/gene-SSH3/gene-TENM3
GO:0010623	programmed cell death involved in cell development	3/257	47/10946	2.72	0.0977184	0.733219	gene-BECN1/gene-LLGL2/gene-SLC4A9
GO:0060251	regulation of glial cell proliferation	3/257	47/10946	2.72	0.0977184	0.733219	gene-CERS4/gene-NRG2/gene-WWTR1
GO:0061136	regulation of proteasomal protein catabolic process	3/257	47/10946	2.72	0.0977184	0.733219	gene-GABARAPL2/gene-MAP1A/gene-RNF114
GO:0035315	hair cell differentiation	4/257	75/10946	2.27	0.0995162	0.733219	gene-FAM65C/gene-SLC44A5/gene-SLC4A9/gene-TMEM132A
GO:0000422	autophagy of mitochondrion	2/257	23/10946	3.7	0.100656	0.733219	gene-BECN1/gene-GABARAPL2
GO:0008293	torso signaling pathway	2/257	23/10946	3.7	0.100656	0.733219	gene-SHC3/gene-ZNF821
GO:0008407	chaeta morphogenesis	2/257	23/10946	3.7	0.100656	0.733219	gene-GPC2/gene-TCF4
GO:0021532	neural tube patterning	2/257	23/10946	3.7	0.100656	0.733219	gene-KDM2A/gene-TCTN3
GO:0033146	regulation of intracellular estrogen receptor signaling pathway	2/257	23/10946	3.7	0.100656	0.733219	gene-BRCA1/gene-WWTR1
GO:0045910	negative regulation of DNA recombination	2/257	23/10946	3.7	0.100656	0.733219	gene-TERF2IP/gene-TP53BP1
GO:2000377	regulation of reactive oxygen species metabolic process	5/257	105/10946	2.03	0.100857	0.733219	gene-BECN1/gene-BRCA1/gene-GRB2/gene-HDAC9/gene-SHC3
GO:0015711	organic anion transport	7/257	168/10946	1.77	0.100866	0.733219	gene-APBA1/gene-G6PC/gene-PLA2G4A/gene-PLIN3/gene-SLC25A1/gene-SLC44A5/gene-SLC4A9
GO:0043266	regulation of potassium ion transport	3/257	48/10946	2.66	0.102516	0.733219	gene-AKAP6/gene-PCNT/gene-WNK4
GO:0045466	R7 cell differentiation	3/257	48/10946	2.66	0.102516	0.733219	gene-EGFR/gene-KDM4B/gene-TENM3
GO:0060119	inner ear receptor cell development	3/257	48/10946	2.66	0.102516	0.733219	gene-FAM65C/gene-SLC4A9/gene-TMEM132A
GO:0062014	negative regulation of small molecule metabolic process	3/257	48/10946	2.66	0.102516	0.733219	gene-BRCA1/gene-HDAC9/gene-SNAI1
GO:0050921	positive regulation of chemotaxis	4/257	76/10946	2.24	0.103217	0.733219	gene-FAM65C/gene-NTF3/gene-PGF/gene-SNAI1
GO:0006281	DNA repair	8/257	202/10946	1.69	0.103434	0.733219	gene-APBB3/gene-BRCA1/gene-KDM2A/gene-LOC121106525/gene-LOC424727/gene-PRPF19/gene-RAD9A/gene-TP53BP1
GO:0051650	establishment of vesicle localization	5/257	106/10946	2.01	0.103943	0.733219	gene-APBA1/gene-CNTNAP1/gene-CNTNAP2/gene-LLGL2/gene-SNAP29
GO:0051052	regulation of DNA metabolic process	7/257	170/10946	1.75	0.105653	0.733219	gene-ANKHD1/gene-APBB3/gene-BRCA1/gene-GRHL3/gene-SHC3/gene-TERF2IP/gene-TP53BP1
GO:0010976	positive regulation of neuron projection development	9/257	237/10946	1.62	0.106322	0.733219	gene-APBB3/gene-FAM151B/gene-FAM151BL/gene-FER/gene-MAP1A/gene-NRG2/gene-RRN3/gene-SHC3/gene-TENM3
GO:0031100	animal organ regeneration	3/257	49/10946	2.61	0.107405	0.733219	gene-BAAT/gene-SHC3/gene-VWF
GO:0043112	receptor metabolic process	3/257	49/10946	2.61	0.107405	0.733219	gene-BECN1/gene-CD9/gene-GRB2
GO:0048636	positive regulation of muscle organ development	3/257	49/10946	2.61	0.107405	0.733219	gene-AKAP6/gene-NRG2/gene-WWTR1
GO:2000736	regulation of stem cell differentiation	3/257	49/10946	2.61	0.107405	0.733219	gene-KDM4B/gene-TCF4/gene-WWTR1
GO:0008206	bile acid metabolic process	2/257	24/10946	3.55	0.108172	0.733219	gene-BAAT/gene-LBFABP
GO:0010172	embryonic body morphogenesis	2/257	24/10946	3.55	0.108172	0.733219	gene-FER/gene-TENM3
GO:0010837	regulation of keratinocyte proliferation	2/257	24/10946	3.55	0.108172	0.733219	gene-SNAI1/gene-WWTR1
GO:0014888	striated muscle adaptation	2/257	24/10946	3.55	0.108172	0.733219	gene-HDAC9/gene-KDM4B
GO:0032204	regulation of telomere maintenance	2/257	24/10946	3.55	0.108172	0.733219	gene-TERF2IP/gene-YLPM1
GO:0035011	melanotic encapsulation of foreign target	2/257	24/10946	3.55	0.108172	0.733219	gene-ARHGEF5/gene-SHC3
GO:0035306	positive regulation of dephosphorylation	2/257	24/10946	3.55	0.108172	0.733219	gene-AKAP6/gene-DLC1
GO:0045467	R7 cell development	2/257	24/10946	3.55	0.108172	0.733219	gene-KDM4B/gene-TENM3
GO:0045907	positive regulation of vasoconstriction	2/257	24/10946	3.55	0.108172	0.733219	gene-MRGPRH/gene-SHC3
GO:0051180	vitamin transport	2/257	24/10946	3.55	0.108172	0.733219	gene-GIF/gene-SLC44A5
GO:0060033	anatomical structure regression	2/257	24/10946	3.55	0.108172	0.733219	gene-BECN1/gene-LLGL2
GO:2000177	regulation of neural precursor cell proliferation	4/257	78/10946	2.18	0.110806	0.733219	gene-HDAC9/gene-KDM2A/gene-LLGL2/gene-PGF
GO:0008543	fibroblast growth factor receptor signaling pathway	3/257	50/10946	2.56	0.112383	0.733219	gene-FGF20/gene-FLRT2/gene-GRB2
GO:0045685	regulation of glial cell differentiation	3/257	50/10946	2.56	0.112383	0.733219	gene-KDM4B/gene-NTF3/gene-TENM3
GO:0072002	Malpighian tubule development	3/257	50/10946	2.56	0.112383	0.733219	gene-DLC1/gene-EGFR/gene-TCF4
GO:0007351	tripartite regional subdivision	4/257	79/10946	2.16	0.114691	0.733219	gene-EGFR/gene-IFIH1/gene-LLGL2/gene-ZNF821
GO:0008595	anterior/posterior axis specification, embryo	4/257	79/10946	2.16	0.114691	0.733219	gene-EGFR/gene-IFIH1/gene-LLGL2/gene-ZNF821
GO:0061041	regulation of wound healing	4/257	79/10946	2.16	0.114691	0.733219	gene-BECN1/gene-CD9/gene-EGFR/gene-GRHL3
GO:0017158	regulation of calcium ion-dependent exocytosis	2/257	25/10946	3.41	0.115831	0.733219	gene-SYT7/gene-SYT9
GO:0021696	cerebellar cortex morphogenesis	2/257	25/10946	3.41	0.115831	0.733219	gene-NRXN3/gene-PCNT
GO:0035006	melanization defense response	2/257	25/10946	3.41	0.115831	0.733219	gene-ARHGEF5/gene-SHC3
GO:0035383	thioester metabolic process	2/257	25/10946	3.41	0.115831	0.733219	gene-BAAT/gene-SLC25A1
GO:0042274	ribosomal small subunit biogenesis	2/257	25/10946	3.41	0.115831	0.733219	gene-MRPS7/gene-SRFBP1
GO:0045570	regulation of imaginal disc growth	2/257	25/10946	3.41	0.115831	0.733219	gene-GPC2/gene-UBAP2
GO:0051148	negative regulation of muscle cell differentiation	2/257	25/10946	3.41	0.115831	0.733219	gene-ANKHD1/gene-HDAC9
GO:0071711	basement membrane organization	2/257	25/10946	3.41	0.115831	0.733219	gene-FLRT2/gene-TENM3
GO:0086004	regulation of cardiac muscle cell contraction	2/257	25/10946	3.41	0.115831	0.733219	gene-AKAP6/gene-PCNT
GO:1903008	organelle disassembly	2/257	25/10946	3.41	0.115831	0.733219	gene-BECN1/gene-GABARAPL2
GO:0038093	Fc receptor signaling pathway	3/257	51/10946	2.51	0.117448	0.733219	gene-FER/gene-GRB2/gene-SHC3
GO:0045454	cell redox homeostasis	3/257	51/10946	2.51	0.117448	0.733219	gene-MSH3/gene-PDIA3/gene-SELENOT
GO:0046834	lipid phosphorylation	3/257	51/10946	2.51	0.117448	0.733219	gene-DGKB/gene-GRB2/gene-NRG2
GO:0051149	positive regulation of muscle cell differentiation	3/257	51/10946	2.51	0.117448	0.733219	gene-AKAP6/gene-FAM65C/gene-NRG2
GO:0001841	neural tube formation	4/257	80/10946	2.13	0.118635	0.733219	gene-DLC1/gene-GRHL3/gene-KDM2A/gene-TCTN3
GO:0007155	cell adhesion	16/257	493/10946	1.38	0.118746	0.733219	gene-ADGRL2/gene-APBA1/gene-CD9/gene-CDH10/gene-CNTNAP1/gene-CNTNAP2/gene-DLC1/gene-EGFR/gene-FER/gene-FLRT2/gene-GRHL3/gene-MEGF10/gene-NRXN3/gene-SHC3/gene-TENM3/gene-VWF
GO:0001890	placenta development	5/257	111/10946	1.92	0.120059	0.733219	gene-GRB2/gene-GRHL3/gene-LLGL2/gene-PLA2G4A/gene-VWF
GO:0045666	positive regulation of neuron differentiation	11/257	314/10946	1.49	0.121304	0.733219	gene-APBB3/gene-FAM151B/gene-FAM151BL/gene-FER/gene-KDM4B/gene-MAP1A/gene-NRG2/gene-RRN3/gene-SHC3/gene-TCF4/gene-TENM3
GO:0044272	sulfur compound biosynthetic process	3/257	52/10946	2.46	0.122597	0.733219	gene-CHST4/gene-CHST6/gene-SLC25A1
GO:0008360	regulation of cell shape	5/257	112/10946	1.9	0.123416	0.733219	gene-DLC1/gene-FER/gene-FGD5/gene-GRHL3/gene-LLGL2
GO:0006446	regulation of translational initiation	2/257	26/10946	3.28	0.123623	0.733219	gene-MIF4GD/gene-PATL1
GO:0010863	positive regulation of phospholipase C activity	2/257	26/10946	3.28	0.123623	0.733219	gene-DLC1/gene-NTF3
GO:0031623	receptor internalization	2/257	26/10946	3.28	0.123623	0.733219	gene-CD9/gene-GRB2
GO:0035584	calcium-mediated signaling using intracellular calcium source	2/257	26/10946	3.28	0.123623	0.733219	gene-ADGRL2/gene-TENM3
GO:0036498	IRE1-mediated unfolded protein response	2/257	26/10946	3.28	0.123623	0.733219	gene-MYDGF/gene-SHC3
GO:0050995	negative regulation of lipid catabolic process	2/257	26/10946	3.28	0.123623	0.733219	gene-CERS4/gene-PLIN3
GO:0051055	negative regulation of lipid biosynthetic process	2/257	26/10946	3.28	0.123623	0.733219	gene-BRCA1/gene-SNAI1
GO:1901532	regulation of hematopoietic progenitor cell differentiation	2/257	26/10946	3.28	0.123623	0.733219	gene-TCF4/gene-WWTR1
GO:2001239	regulation of extrinsic apoptotic signaling pathway in absence of ligand	2/257	26/10946	3.28	0.123623	0.733219	gene-NRG2/gene-SNAI1
GO:0042330	taxis	15/257	460/10946	1.39	0.124448	0.733219	gene-APBB3/gene-FER/gene-FEZ1/gene-FLRT2/gene-GPC2/gene-GRB2/gene-KDM4B/gene-NRXN3/gene-NTF3/gene-PGF/gene-SEMA4D/gene-SHC3/gene-TENM3/gene-WNK4/gene-ZNF821
GO:0001894	tissue homeostasis	6/257	145/10946	1.76	0.126237	0.733219	gene-DLC1/gene-EGFR/gene-MAP1A/gene-PLA2G4A/gene-WWTR1/gene-ZNF821
GO:0060041	retina development in camera-type eye	6/257	145/10946	1.76	0.126237	0.733219	gene-DIO2/gene-LOC121108310/gene-MAN2A1/gene-MEGF10/gene-SLC4A9/gene-WWTR1
GO:0016202	regulation of striated muscle tissue development	5/257	113/10946	1.88	0.126817	0.733219	gene-AKAP6/gene-HDAC9/gene-MEGF10/gene-NRG2/gene-WWTR1
GO:0042462	eye photoreceptor cell development	5/257	113/10946	1.88	0.126817	0.733219	gene-DIO2/gene-GRHL3/gene-KDM4B/gene-LOC121108310/gene-TENM3
GO:0002065	columnar/cuboidal epithelial cell differentiation	9/257	247/10946	1.55	0.12778	0.733219	gene-EGFR/gene-FAM65C/gene-KDM2A/gene-SLC4A9/gene-TCF4/gene-TMEM132A/gene-TMEM231/gene-UBAP2/gene-WWTR1
GO:0006006	glucose metabolic process	3/257	53/10946	2.41	0.127826	0.733219	gene-G6PC/gene-MRGPRH/gene-SLC25A1
GO:0007157	heterophilic cell-cell adhesion via plasma membrane cell adhesion molecules	3/257	53/10946	2.41	0.127826	0.733219	gene-ADGRL2/gene-NRXN3/gene-TENM3
GO:0022416	chaeta development	3/257	53/10946	2.41	0.127826	0.733219	gene-GPC2/gene-TCF4/gene-TENM3
GO:0042552	myelination	3/257	53/10946	2.41	0.127826	0.733219	gene-CD9/gene-NTF3/gene-TENM3
GO:1903036	positive regulation of response to wounding	3/257	53/10946	2.41	0.127826	0.733219	gene-EGFR/gene-NRG2/gene-SHC3
GO:0050954	sensory perception of mechanical stimulus	6/257	146/10946	1.75	0.129231	0.733219	gene-APBA1/gene-FAM65C/gene-MAP1A/gene-PCNT/gene-SNAI1/gene-TMEM132A
GO:0070925	organelle assembly	14/257	427/10946	1.4	0.130407	0.733219	gene-ANKHD1/gene-BECN1/gene-GABARAPL2/gene-IFIH1/gene-LLGL2/gene-MRPS7/gene-NRXN3/gene-PATL1/gene-PCNT/gene-SGCZ/gene-TCTN3/gene-TMEM216/gene-TMEM231/gene-WWTR1
GO:0007367	segment polarity determination	2/257	27/10946	3.15	0.131537	0.733219	gene-EGFR/gene-GPC2
GO:0007426	tracheal outgrowth, open tracheal system	2/257	27/10946	3.15	0.131537	0.733219	gene-GRHL3/gene-SHC3
GO:0014065	phosphatidylinositol 3-kinase signaling	2/257	27/10946	3.15	0.131537	0.733219	gene-MEGF10/gene-PTEN
GO:0021587	cerebellum morphogenesis	2/257	27/10946	3.15	0.131537	0.733219	gene-NRXN3/gene-PCNT
GO:0040025	vulval development	2/257	27/10946	3.15	0.131537	0.733219	gene-LOC121106525/gene-TCF4
GO:0051402	neuron apoptotic process	2/257	27/10946	3.15	0.131537	0.733219	gene-DIO2/gene-HDAC9
GO:2000647	negative regulation of stem cell proliferation	2/257	27/10946	3.15	0.131537	0.733219	gene-LLGL2/gene-SNAI1
GO:0035150	regulation of tube size	6/257	147/10946	1.74	0.132258	0.733219	gene-CNTNAP1/gene-CNTNAP2/gene-GRHL3/gene-MPP2/gene-MRGPRH/gene-SHC3
GO:0009950	dorsal/ventral axis specification	3/257	54/10946	2.37	0.133135	0.733219	gene-EGFR/gene-UBAP2/gene-WWTR1
GO:0032271	regulation of protein polymerization	5/257	115/10946	1.85	0.133745	0.733219	gene-FER/gene-GRB2/gene-MAP1A/gene-PCNT/gene-SSH3
GO:0051495	positive regulation of cytoskeleton organization	5/257	115/10946	1.85	0.133745	0.733219	gene-FER/gene-GRB2/gene-MAP1A/gene-NTF3/gene-PCNT
GO:0061919	process utilizing autophagic mechanism	4/257	84/10946	2.03	0.134985	0.733219	gene-BECN1/gene-GABARAPL2/gene-NBR1/gene-SNAP29
GO:0007169	transmembrane receptor protein tyrosine kinase signaling pathway	11/257	321/10946	1.46	0.135158	0.733219	gene-ANKHD1/gene-DLC1/gene-EGFR/gene-FER/gene-FLRT2/gene-GRB2/gene-NRG2/gene-NTF3/gene-PGF/gene-SHC3/gene-ZNF821
GO:0070507	regulation of microtubule cytoskeleton organization	6/257	148/10946	1.73	0.135319	0.733219	gene-BRCA1/gene-FAM65C/gene-FER/gene-MAP1A/gene-PCNT/gene-TNFAIP8L1
GO:0048232	male gamete generation	14/257	430/10946	1.39	0.135621	0.733219	gene-CCNO/gene-CDH10/gene-CNTD1/gene-EGFR/gene-G2E3/gene-KDM2A/gene-LOC107055318/gene-LOC107055319/gene-LOC112530458/gene-LOC121107720/gene-LOC121107724/gene-LOC121107725/gene-LOC121108310/gene-PCNT
GO:0051046	regulation of secretion	14/257	430/10946	1.39	0.135621	0.733219	gene-APBB3/gene-ARHGEF5/gene-FER/gene-FEZ1/gene-G6PC/gene-IFIH1/gene-LLGL2/gene-MRGPRH/gene-NRG2/gene-PGF/gene-RUNDC1/gene-SELENOT/gene-SNAP29/gene-WNK4
GO:0001751	compound eye photoreceptor cell differentiation	5/257	116/10946	1.84	0.137273	0.733219	gene-ANKHD1/gene-EGFR/gene-GRHL3/gene-KDM4B/gene-TENM3
GO:1901861	regulation of muscle tissue development	5/257	116/10946	1.84	0.137273	0.733219	gene-AKAP6/gene-HDAC9/gene-MEGF10/gene-NRG2/gene-WWTR1
GO:0097711	ciliary basal body-plasma membrane docking	3/257	55/10946	2.32	0.138518	0.733219	gene-PCNT/gene-TCTN3/gene-TMEM216
GO:0033273	response to vitamin	4/257	85/10946	2	0.13921	0.733219	gene-BECN1/gene-MAP1A/gene-PLA2G4A/gene-VWF
GO:0051651	maintenance of location in cell	4/257	85/10946	2	0.13921	0.733219	gene-LOC121106525/gene-LOC121108310/gene-PCNT/gene-SGCZ
GO:1903322	positive regulation of protein modification by small protein conjugation or removal	4/257	85/10946	2	0.13921	0.733219	gene-BRCA1/gene-HDAC9/gene-KDM2A/gene-LOC121108310
GO:0030838	positive regulation of actin filament polymerization	2/257	28/10946	3.04	0.139564	0.733219	gene-FER/gene-GRB2
GO:0043500	muscle adaptation	2/257	28/10946	3.04	0.139564	0.733219	gene-HDAC9/gene-KDM4B
GO:0045739	positive regulation of DNA repair	2/257	28/10946	3.04	0.139564	0.733219	gene-APBB3/gene-BRCA1
GO:0048854	brain morphogenesis	2/257	28/10946	3.04	0.139564	0.733219	gene-PCNT/gene-SLC4A9
GO:1900274	regulation of phospholipase C activity	2/257	28/10946	3.04	0.139564	0.733219	gene-DLC1/gene-NTF3
GO:0010632	regulation of epithelial cell migration	6/257	150/10946	1.7	0.141541	0.733219	gene-DLC1/gene-HDAC9/gene-MCC/gene-PGF/gene-SNAI1/gene-ZNF821
GO:0061024	membrane organization	13/257	397/10946	1.39	0.142228	0.733219	gene-BECN1/gene-CD9/gene-CNTNAP1/gene-CNTNAP2/gene-GRB2/gene-GRHL3/gene-LOC121106525/gene-LOC121108310/gene-MEGF10/gene-NRXN3/gene-SGCZ/gene-SNAP29/gene-TENM3
GO:0042048	olfactory behavior	3/257	56/10946	2.28	0.143975	0.733219	gene-EGFR/gene-MAP1A/gene-MRGPRH
GO:0043535	regulation of blood vessel endothelial cell migration	3/257	56/10946	2.28	0.143975	0.733219	gene-DLC1/gene-HDAC9/gene-PGF
GO:0055117	regulation of cardiac muscle contraction	3/257	56/10946	2.28	0.143975	0.733219	gene-AKAP6/gene-HDAC9/gene-PCNT
GO:0031099	regeneration	6/257	151/10946	1.69	0.144701	0.733219	gene-BAAT/gene-CHST4/gene-MAP1A/gene-SHC3/gene-VWF/gene-WWTR1
GO:0006974	cellular response to DNA damage stimulus	10/257	291/10946	1.46	0.147565	0.733219	gene-APBB3/gene-BRCA1/gene-GRB2/gene-KDM2A/gene-LOC121106525/gene-LOC121108310/gene-SLF1/gene-TERF2IP/gene-TP53BP1/gene-WWTR1
GO:0015748	organophosphate ester transport	2/257	29/10946	2.94	0.147694	0.733219	gene-G6PC/gene-SLC44A5
GO:0021695	cerebellar cortex development	2/257	29/10946	2.94	0.147694	0.733219	gene-NRXN3/gene-PCNT
GO:0045138	nematode male tail tip morphogenesis	2/257	29/10946	2.94	0.147694	0.733219	gene-BECN1/gene-TCF4
GO:0070849	response to epidermal growth factor	2/257	29/10946	2.94	0.147694	0.733219	gene-BECN1/gene-SNAI1
GO:0071364	cellular response to epidermal growth factor stimulus	2/257	29/10946	2.94	0.147694	0.733219	gene-BECN1/gene-SNAI1
GO:2000178	negative regulation of neural precursor cell proliferation	2/257	29/10946	2.94	0.147694	0.733219	gene-KDM2A/gene-LLGL2
GO:2000648	positive regulation of stem cell proliferation	2/257	29/10946	2.94	0.147694	0.733219	gene-HDAC9/gene-PGF
GO:0032984	protein-containing complex disassembly	4/257	87/10946	1.96	0.147816	0.733219	gene-GABARAPL2/gene-MRPS7/gene-NRG2/gene-SNAP29
GO:0035222	wing disc pattern formation	3/257	57/10946	2.24	0.149502	0.733219	gene-EGFR/gene-GPC2/gene-ZNF821
GO:0044839	cell cycle G2/M phase transition	3/257	57/10946	2.24	0.149502	0.733219	gene-CCNO/gene-EGFR/gene-PCNT
GO:0051489	regulation of filopodium assembly	3/257	57/10946	2.24	0.149502	0.733219	gene-FAM65C/gene-NRXN3/gene-TENM3
GO:0010469	regulation of signaling receptor activity	6/257	153/10946	1.67	0.151118	0.733219	gene-FLRT2/gene-NRG2/gene-NRXN3/gene-NTF3/gene-PGF/gene-SHC3
GO:0016358	dendrite development	7/257	188/10946	1.59	0.153994	0.733219	gene-FAM151B/gene-FAM151BL/gene-GPC2/gene-KDM4B/gene-MAP1A/gene-SEMA4D/gene-TENM3
GO:0007265	Ras protein signal transduction	6/257	154/10946	1.66	0.154373	0.733219	gene-CCNO/gene-DLC1/gene-FAM65C/gene-GRB2/gene-LOC121110409/gene-SHC3
GO:0009612	response to mechanical stimulus	6/257	154/10946	1.66	0.154373	0.733219	gene-APBA1/gene-FAM65C/gene-HDAC9/gene-MAP1A/gene-NRXN3/gene-TMEM132A
GO:0006942	regulation of striated muscle contraction	3/257	58/10946	2.2	0.155096	0.733219	gene-AKAP6/gene-HDAC9/gene-PCNT
GO:0032414	positive regulation of ion transmembrane transporter activity	3/257	58/10946	2.2	0.155096	0.733219	gene-AKAP6/gene-PCNT/gene-WNK4
GO:0048589	developmental growth	12/257	367/10946	1.39	0.155314	0.733219	gene-APBA1/gene-FER/gene-G6PC/gene-GRHL3/gene-KDM2A/gene-LLGL2/gene-MAP1A/gene-MPP2/gene-PCNT/gene-SLC4A9/gene-TENM3/gene-WWTR1
GO:0006582	melanin metabolic process	2/257	30/10946	2.84	0.155917	0.733219	gene-ARHGEF5/gene-SHC3
GO:0007131	reciprocal meiotic recombination	2/257	30/10946	2.84	0.155917	0.733219	gene-CNTD1/gene-MSH4
GO:0008258	head involution	2/257	30/10946	2.84	0.155917	0.733219	gene-DLC1/gene-ZNF821
GO:1903115	regulation of actin filament-based movement	2/257	30/10946	2.84	0.155917	0.733219	gene-AKAP6/gene-PCNT
GO:0001838	embryonic epithelial tube formation	4/257	89/10946	1.91	0.156622	0.733219	gene-DLC1/gene-GRHL3/gene-KDM2A/gene-TCTN3
GO:0016567	protein ubiquitination	12/257	369/10946	1.39	0.159502	0.733219	gene-BRCA1/gene-G2E3/gene-KDM2A/gene-LOC107055318/gene-LOC107055319/gene-LOC112530458/gene-LOC121107720/gene-LOC121107724/gene-LOC121107725/gene-LOC121108310/gene-RNF114/gene-UHRF1
GO:0000086	G2/M transition of mitotic cell cycle	3/257	59/10946	2.17	0.160755	0.733219	gene-CCNO/gene-EGFR/gene-PCNT
GO:0001843	neural tube closure	3/257	59/10946	2.17	0.160755	0.733219	gene-DLC1/gene-GRHL3/gene-KDM2A
GO:0042335	cuticle development	3/257	59/10946	2.17	0.160755	0.733219	gene-GPC2/gene-GRHL3/gene-LLGL2
GO:0022411	cellular component disassembly	6/257	156/10946	1.64	0.160977	0.733219	gene-BECN1/gene-GABARAPL2/gene-MRPS7/gene-NRG2/gene-SNAI1/gene-SNAP29
GO:0035023	regulation of Rho protein signal transduction	4/257	90/10946	1.89	0.161097	0.733219	gene-ARHGEF5/gene-DLC1/gene-FAM65C/gene-FGD5
GO:0045766	positive regulation of angiogenesis	4/257	90/10946	1.89	0.161097	0.733219	gene-BRCA1/gene-HDAC9/gene-MYDGF/gene-PGF
GO:0048634	regulation of muscle organ development	5/257	123/10946	1.73	0.163072	0.733219	gene-AKAP6/gene-HDAC9/gene-MEGF10/gene-NRG2/gene-WWTR1
GO:0048638	regulation of developmental growth	13/257	408/10946	1.36	0.163818	0.733219	gene-AKAP6/gene-BECN1/gene-DIO2/gene-FAM151B/gene-FAM151BL/gene-FEZ1/gene-GPC2/gene-MAP1A/gene-MRGPRH/gene-NRG2/gene-PATL1/gene-UBAP2/gene-WWTR1
GO:0090066	regulation of anatomical structure size	13/257	408/10946	1.36	0.163818	0.733219	gene-BECN1/gene-CNTNAP1/gene-CNTNAP2/gene-FER/gene-FEZ1/gene-GRB2/gene-GRHL3/gene-MAP1A/gene-MPP2/gene-MRGPRH/gene-SEMA4D/gene-SHC3/gene-SSH3
GO:0006637	acyl-CoA metabolic process	2/257	31/10946	2.75	0.164225	0.733219	gene-BAAT/gene-SLC25A1
GO:0007044	cell-substrate junction assembly	2/257	31/10946	2.75	0.164225	0.733219	gene-DLC1/gene-LLGL2
GO:0010596	negative regulation of endothelial cell migration	2/257	31/10946	2.75	0.164225	0.733219	gene-DLC1/gene-HDAC9
GO:0045604	regulation of epidermal cell differentiation	2/257	31/10946	2.75	0.164225	0.733219	gene-FER/gene-GRHL3
GO:0090049	regulation of cell migration involved in sprouting angiogenesis	2/257	31/10946	2.75	0.164225	0.733219	gene-DLC1/gene-HDAC9
GO:1903671	negative regulation of sprouting angiogenesis	2/257	31/10946	2.75	0.164225	0.733219	gene-DLC1/gene-HDAC9
GO:1905037	autophagosome organization	2/257	31/10946	2.75	0.164225	0.733219	gene-BECN1/gene-GABARAPL2
GO:0000578	embryonic axis specification	4/257	91/10946	1.87	0.165619	0.733219	gene-EGFR/gene-IFIH1/gene-LLGL2/gene-ZNF821
GO:0006898	receptor-mediated endocytosis	4/257	91/10946	1.87	0.165619	0.733219	gene-AP1G1/gene-CD9/gene-GRB2/gene-MEGF10
GO:0017157	regulation of exocytosis	4/257	91/10946	1.87	0.165619	0.733219	gene-FER/gene-FEZ1/gene-LLGL2/gene-STX3
GO:0002576	platelet degranulation	3/257	60/10946	2.13	0.166475	0.733219	gene-CD9/gene-PGF/gene-VWF
GO:0046854	phosphatidylinositol phosphorylation	3/257	60/10946	2.13	0.166475	0.733219	gene-GRB2/gene-NRG2/gene-PI4KA
GO:0019722	calcium-mediated signaling	5/257	124/10946	1.72	0.166909	0.733219	gene-ADGRL2/gene-CABP4/gene-HDAC9/gene-RCAN3/gene-TENM3
GO:0006914	autophagy	4/257	92/10946	1.85	0.170186	0.733219	gene-BECN1/gene-GABARAPL2/gene-NBR1/gene-SNAP29
GO:0070646	protein modification by small protein removal	4/257	92/10946	1.85	0.170186	0.733219	gene-BECN1/gene-BRCA1/gene-CCNO/gene-IFIH1
GO:0050920	regulation of chemotaxis	5/257	125/10946	1.7	0.170781	0.733219	gene-FAM65C/gene-NTF3/gene-PGF/gene-SEMA4D/gene-SNAI1
GO:0007264	small GTPase mediated signal transduction	8/257	229/10946	1.49	0.171147	0.733219	gene-CCNO/gene-DLC1/gene-FAM65C/gene-GRB2/gene-LOC121110409/gene-RHOD/gene-RND2/gene-SHC3
GO:0007635	chemosensory behavior	3/257	61/10946	2.09	0.172255	0.733219	gene-EGFR/gene-MAP1A/gene-MRGPRH
GO:0060113	inner ear receptor cell differentiation	3/257	61/10946	2.09	0.172255	0.733219	gene-FAM65C/gene-SLC4A9/gene-TMEM132A
GO:0002688	regulation of leukocyte chemotaxis	2/257	32/10946	2.66	0.17261	0.733219	gene-FAM65C/gene-PGF
GO:0006911	phagocytosis, engulfment	2/257	32/10946	2.66	0.17261	0.733219	gene-BECN1/gene-MEGF10
GO:0035159	regulation of tube length, open tracheal system	2/257	32/10946	2.66	0.17261	0.733219	gene-GRHL3/gene-MPP2
GO:0042733	embryonic digit morphogenesis	2/257	32/10946	2.66	0.17261	0.733219	gene-GRHL3/gene-TMEM231
GO:0060446	branching involved in open tracheal system development	2/257	32/10946	2.66	0.17261	0.733219	gene-GRHL3/gene-KDM4B
GO:0061842	microtubule organizing center localization	2/257	32/10946	2.66	0.17261	0.733219	gene-LOC121106525/gene-PCNT
GO:0009880	embryonic pattern specification	6/257	160/10946	1.6	0.174542	0.733219	gene-EGFR/gene-GPC2/gene-IFIH1/gene-LLGL2/gene-MEIS2/gene-ZNF821
GO:0007350	blastoderm segmentation	5/257	126/10946	1.69	0.174687	0.733219	gene-EGFR/gene-GPC2/gene-IFIH1/gene-LLGL2/gene-ZNF821
GO:0009913	epidermal cell differentiation	5/257	126/10946	1.69	0.174687	0.733219	gene-FAM65C/gene-SLC44A5/gene-SLC4A9/gene-TMEM132A/gene-WWTR1
GO:0044057	regulation of system process	11/257	340/10946	1.38	0.176817	0.733219	gene-AKAP6/gene-BECN1/gene-HDAC9/gene-MRGPRH/gene-NRG2/gene-NRXN3/gene-PCNT/gene-RUNDC1/gene-SHC3/gene-TENM3/gene-WNK4
GO:0040007	growth	12/257	377/10946	1.36	0.17682	0.733219	gene-APBA1/gene-FER/gene-G6PC/gene-GRHL3/gene-KDM2A/gene-LLGL2/gene-MAP1A/gene-MPP2/gene-PCNT/gene-SLC4A9/gene-TENM3/gene-WWTR1
GO:0007127	meiosis I	3/257	62/10946	2.06	0.178091	0.733219	gene-CCNO/gene-CNTD1/gene-LOC121106525
GO:0031570	DNA integrity checkpoint	3/257	62/10946	2.06	0.178091	0.733219	gene-BRCA1/gene-SLF1/gene-TP53BP1
GO:0042067	establishment of ommatidial planar polarity	3/257	62/10946	2.06	0.178091	0.733219	gene-EGFR/gene-GRHL3/gene-ZNF821
GO:0055024	regulation of cardiac muscle tissue development	3/257	62/10946	2.06	0.178091	0.733219	gene-AKAP6/gene-NRG2/gene-WWTR1
GO:0032940	secretion by cell	13/257	415/10946	1.33	0.178386	0.733219	gene-APBA1/gene-BECN1/gene-CD9/gene-CNTNAP1/gene-CNTNAP2/gene-GGA3/gene-LLGL2/gene-NRXN3/gene-PGF/gene-SELENOT/gene-SLC44A5/gene-SNAP29/gene-VWF
GO:0001708	cell fate specification	5/257	127/10946	1.68	0.178628	0.733219	gene-EGFR/gene-KDM4B/gene-TCF4/gene-TENM3/gene-WWTR1
GO:0080135	regulation of cellular response to stress	12/257	378/10946	1.35	0.179047	0.733219	gene-APBB3/gene-BRCA1/gene-CERS4/gene-NBR1/gene-NRG2/gene-PHLPP2/gene-SHC3/gene-SNAI1/gene-TERF2IP/gene-TNFAIP8L1/gene-TP53BP1/gene-ZNF821
GO:0046890	regulation of lipid biosynthetic process	4/257	94/10946	1.81	0.17945	0.733219	gene-BRCA1/gene-CERS4/gene-PLA2G4A/gene-SNAI1
GO:0007028	cytoplasm organization	2/257	33/10946	2.58	0.181062	0.733219	gene-IFIH1/gene-RRN3
GO:0007097	nuclear migration	2/257	33/10946	2.58	0.181062	0.733219	gene-LOC121106525/gene-SSH3
GO:0010611	regulation of cardiac muscle hypertrophy	2/257	33/10946	2.58	0.181062	0.733219	gene-AKAP6/gene-BECN1
GO:0046549	retinal cone cell development	2/257	33/10946	2.58	0.181062	0.733219	gene-DIO2/gene-LOC121108310
GO:0050994	regulation of lipid catabolic process	2/257	33/10946	2.58	0.181062	0.733219	gene-CERS4/gene-PLIN3
GO:0051642	centrosome localization	2/257	33/10946	2.58	0.181062	0.733219	gene-LOC121106525/gene-PCNT
GO:0060043	regulation of cardiac muscle cell proliferation	2/257	33/10946	2.58	0.181062	0.733219	gene-NRG2/gene-WWTR1
GO:0070997	neuron death	2/257	33/10946	2.58	0.181062	0.733219	gene-DIO2/gene-HDAC9
GO:0007167	enzyme linked receptor protein signaling pathway	14/257	454/10946	1.31	0.181393	0.733219	gene-ANKHD1/gene-DLC1/gene-EGFR/gene-FER/gene-FLRT2/gene-GPC2/gene-GRB2/gene-LLGL2/gene-NRG2/gene-NTF3/gene-PGF/gene-SHC3/gene-ZFYVE16/gene-ZNF821
GO:0044089	positive regulation of cellular component biogenesis	11/257	342/10946	1.37	0.181529	0.733219	gene-ADGRL2/gene-BECN1/gene-FAM65C/gene-FER/gene-FLRT2/gene-GRB2/gene-HDAC9/gene-MAP1A/gene-NRXN3/gene-PCNT/gene-TENM3
GO:0045055	regulated exocytosis	9/257	269/10946	1.42	0.182304	0.733219	gene-APBA1/gene-CD9/gene-CNTNAP1/gene-CNTNAP2/gene-LLGL2/gene-PGF/gene-SLC44A5/gene-SNAP29/gene-VWF
GO:0098609	cell-cell adhesion	8/257	233/10946	1.46	0.182592	0.733219	gene-ADGRL2/gene-CDH10/gene-EGFR/gene-FER/gene-MEGF10/gene-NRXN3/gene-SHC3/gene-TENM3
GO:0030855	epithelial cell differentiation	15/257	493/10946	1.3	0.18377	0.733219	gene-EGFR/gene-FAM65C/gene-GRHL3/gene-KDM2A/gene-NRG2/gene-PCNT/gene-PROX2/gene-SLC44A5/gene-SLC4A9/gene-TCF4/gene-TMEM132A/gene-TMEM231/gene-UBAP2/gene-WWTR1/gene-ZNF821
GO:0006275	regulation of DNA replication	3/257	63/10946	2.03	0.183981	0.733219	gene-ANKHD1/gene-MCIDAS/gene-SHC3
GO:0008286	insulin receptor signaling pathway	3/257	63/10946	2.03	0.183981	0.733219	gene-FER/gene-GRB2/gene-SHC3
GO:0010171	body morphogenesis	3/257	63/10946	2.03	0.183981	0.733219	gene-FER/gene-TCF4/gene-TENM3
GO:0010594	regulation of endothelial cell migration	4/257	95/10946	1.79	0.184145	0.733219	gene-DLC1/gene-HDAC9/gene-PGF/gene-SNAI1
GO:0070848	response to growth factor	10/257	307/10946	1.39	0.186114	0.733219	gene-BECN1/gene-FER/gene-FLRT2/gene-GRB2/gene-LLGL2/gene-MAP1A/gene-NTF3/gene-SHC3/gene-SNAI1/gene-ZFYVE16
GO:0009798	axis specification	6/257	164/10946	1.56	0.18856	0.733219	gene-EGFR/gene-IFIH1/gene-LLGL2/gene-UBAP2/gene-WWTR1/gene-ZNF821
GO:0032886	regulation of microtubule-based process	6/257	164/10946	1.56	0.18856	0.733219	gene-BRCA1/gene-FAM65C/gene-FER/gene-MAP1A/gene-PCNT/gene-TNFAIP8L1
GO:0009267	cellular response to starvation	4/257	96/10946	1.77	0.18888	0.733219	gene-BECN1/gene-FAM65C/gene-GABARAPL2/gene-HDAC9
GO:0061326	renal tubule development	4/257	96/10946	1.77	0.18888	0.733219	gene-DLC1/gene-EGFR/gene-HDAC9/gene-TCF4
GO:0000045	autophagosome assembly	2/257	34/10946	2.51	0.189576	0.733219	gene-BECN1/gene-GABARAPL2
GO:0006073	cellular glucan metabolic process	2/257	34/10946	2.51	0.189576	0.733219	gene-BECN1/gene-G6PC
GO:0016052	carbohydrate catabolic process	2/257	34/10946	2.51	0.189576	0.733219	gene-BECN1/gene-G6PC
GO:0032434	regulation of proteasomal ubiquitin-dependent protein catabolic process	2/257	34/10946	2.51	0.189576	0.733219	gene-MAP1A/gene-RNF114
GO:0044042	glucan metabolic process	2/257	34/10946	2.51	0.189576	0.733219	gene-BECN1/gene-G6PC
GO:0045668	negative regulation of osteoblast differentiation	2/257	34/10946	2.51	0.189576	0.733219	gene-HDAC9/gene-NBR1
GO:0050000	chromosome localization	2/257	34/10946	2.51	0.189576	0.733219	gene-BECN1/gene-LOC121106525
GO:0051303	establishment of chromosome localization	2/257	34/10946	2.51	0.189576	0.733219	gene-BECN1/gene-LOC121106525
GO:0060425	lung morphogenesis	2/257	34/10946	2.51	0.189576	0.733219	gene-GRHL3/gene-WWTR1
GO:0071320	cellular response to cAMP	2/257	34/10946	2.51	0.189576	0.733219	gene-AKAP6/gene-PCNT
GO:0014020	primary neural tube formation	3/257	64/10946	2	0.189923	0.733219	gene-DLC1/gene-GRHL3/gene-KDM2A
GO:0032411	positive regulation of transporter activity	3/257	64/10946	2	0.189923	0.733219	gene-AKAP6/gene-PCNT/gene-WNK4
GO:0042440	pigment metabolic process	3/257	64/10946	2	0.189923	0.733219	gene-ARHGEF5/gene-MAN2A1/gene-SHC3
GO:0018108	peptidyl-tyrosine phosphorylation	5/257	130/10946	1.64	0.190648	0.733219	gene-EGFR/gene-FER/gene-GRB2/gene-NRG2/gene-SHC3
GO:0018212	peptidyl-tyrosine modification	5/257	130/10946	1.64	0.190648	0.733219	gene-EGFR/gene-FER/gene-GRB2/gene-NRG2/gene-SHC3
GO:0005975	carbohydrate metabolic process	8/257	236/10946	1.44	0.191389	0.733219	gene-B4GALT5/gene-BECN1/gene-CHST6/gene-G6PC/gene-MAN2A1/gene-MRGPRH/gene-SLC25A1/gene-YDJC
GO:0043603	cellular amide metabolic process	7/257	201/10946	1.48	0.194252	0.733219	gene-BAAT/gene-BECN1/gene-CERS4/gene-MRPS7/gene-PATL1/gene-SELENOT/gene-SLC25A1
GO:0050807	regulation of synapse organization	8/257	237/10946	1.44	0.194361	0.733219	gene-ADGRL2/gene-FEZ1/gene-FLRT2/gene-LOC121110409/gene-MAP1A/gene-NRXN3/gene-PATL1/gene-TENM3
GO:0060828	regulation of canonical Wnt signaling pathway	5/257	131/10946	1.63	0.194718	0.733219	gene-GPC2/gene-MCC/gene-SNAI1/gene-WNK4/gene-WWTR1
GO:0008356	asymmetric cell division	3/257	65/10946	1.97	0.195912	0.733219	gene-GPC2/gene-LLGL2/gene-ZFYVE16
GO:0060606	tube closure	3/257	65/10946	1.97	0.195912	0.733219	gene-DLC1/gene-GRHL3/gene-KDM2A
GO:0000018	regulation of DNA recombination	2/257	35/10946	2.43	0.198142	0.733219	gene-TERF2IP/gene-TP53BP1
GO:0007443	Malpighian tubule morphogenesis	2/257	35/10946	2.43	0.198142	0.733219	gene-DLC1/gene-EGFR
GO:0008355	olfactory learning	2/257	35/10946	2.43	0.198142	0.733219	gene-EGFR/gene-MAP1A
GO:0010830	regulation of myotube differentiation	2/257	35/10946	2.43	0.198142	0.733219	gene-FAM65C/gene-HDAC9
GO:0015909	long-chain fatty acid transport	2/257	35/10946	2.43	0.198142	0.733219	gene-PLA2G4A/gene-PLIN3
GO:0031103	axon regeneration	2/257	35/10946	2.43	0.198142	0.733219	gene-CHST4/gene-MAP1A
GO:0035277	spiracle morphogenesis, open tracheal system	2/257	35/10946	2.43	0.198142	0.733219	gene-DLC1/gene-EGFR
GO:0042670	retinal cone cell differentiation	2/257	35/10946	2.43	0.198142	0.733219	gene-DIO2/gene-LOC121108310
GO:0044264	cellular polysaccharide metabolic process	2/257	35/10946	2.43	0.198142	0.733219	gene-BECN1/gene-G6PC
GO:0046879	hormone secretion	2/257	35/10946	2.43	0.198142	0.733219	gene-SELENOT/gene-SLC44A5
GO:0060252	positive regulation of glial cell proliferation	2/257	35/10946	2.43	0.198142	0.733219	gene-NRG2/gene-WWTR1
GO:2001021	negative regulation of response to DNA damage stimulus	2/257	35/10946	2.43	0.198142	0.733219	gene-SNAI1/gene-TP53BP1
GO:0021782	glial cell development	4/257	98/10946	1.74	0.198465	0.733219	gene-CD9/gene-CNTNAP1/gene-CNTNAP2/gene-TENM3
GO:0032869	cellular response to insulin stimulus	5/257	132/10946	1.61	0.198818	0.733219	gene-DLC1/gene-FER/gene-GRB2/gene-HDAC9/gene-SHC3
GO:0007033	vacuole organization	3/257	66/10946	1.94	0.201948	0.733219	gene-BECN1/gene-GABARAPL2/gene-MAN2A1
GO:0042051	compound eye photoreceptor development	3/257	66/10946	1.94	0.201948	0.733219	gene-GRHL3/gene-KDM4B/gene-TENM3
GO:0010927	cellular component assembly involved in morphogenesis	5/257	133/10946	1.6	0.202948	0.733219	gene-ANKHD1/gene-CD9/gene-EGFR/gene-SGCZ/gene-TENM3
GO:0040017	positive regulation of locomotion	11/257	351/10946	1.33	0.203445	0.733219	gene-APBA1/gene-FAM65C/gene-FER/gene-HDAC9/gene-HMCN1/gene-NTF3/gene-PGF/gene-RUNDC1/gene-SNAI1/gene-TENM3/gene-ZNF821
GO:0051271	negative regulation of cellular component movement	7/257	204/10946	1.46	0.204097	0.733219	gene-CD9/gene-CERS4/gene-DLC1/gene-FAM65C/gene-HDAC9/gene-LLGL2/gene-MCC
GO:0045765	regulation of angiogenesis	6/257	169/10946	1.51	0.206671	0.733219	gene-BRCA1/gene-DLC1/gene-HDAC9/gene-MYDGF/gene-PGF/gene-SHC3
GO:0005977	glycogen metabolic process	2/257	36/10946	2.37	0.206754	0.733219	gene-BECN1/gene-G6PC
GO:0007365	periodic partitioning	2/257	36/10946	2.37	0.206754	0.733219	gene-EGFR/gene-GPC2
GO:0014743	regulation of muscle hypertrophy	2/257	36/10946	2.37	0.206754	0.733219	gene-AKAP6/gene-BECN1
GO:0031102	neuron projection regeneration	2/257	36/10946	2.37	0.206754	0.733219	gene-CHST4/gene-MAP1A
GO:0031338	regulation of vesicle fusion	2/257	36/10946	2.37	0.206754	0.733219	gene-PLA2G4A/gene-RUNDC1
GO:0035418	protein localization to synapse	2/257	36/10946	2.37	0.206754	0.733219	gene-MAP1A/gene-NRXN3
GO:1901570	fatty acid derivative biosynthetic process	2/257	36/10946	2.37	0.206754	0.733219	gene-PLA2G4A/gene-SLC25A1
GO:2000378	negative regulation of reactive oxygen species metabolic process	2/257	36/10946	2.37	0.206754	0.733219	gene-BECN1/gene-BRCA1
GO:0008284	positive regulation of cell population proliferation	14/257	466/10946	1.28	0.206821	0.733219	gene-CCNO/gene-EGFR/gene-FER/gene-GCFC2/gene-HDAC9/gene-KDM4B/gene-MEIS2/gene-MYDGF/gene-NRG2/gene-NTF3/gene-PGF/gene-PLA2G4A/gene-SHC3/gene-WWTR1
GO:0034765	regulation of ion transmembrane transport	7/257	205/10946	1.45	0.207421	0.733219	gene-AKAP6/gene-KCNA1/gene-KCNA5/gene-KCNH7/gene-NRXN3/gene-PCNT/gene-WNK4
GO:0006665	sphingolipid metabolic process	3/257	67/10946	1.91	0.208027	0.733219	gene-CERS4/gene-HACD4/gene-PDXDC1
GO:0007308	oocyte construction	3/257	67/10946	1.91	0.208027	0.733219	gene-EGFR/gene-IFIH1/gene-LLGL2
GO:0007309	oocyte axis specification	3/257	67/10946	1.91	0.208027	0.733219	gene-EGFR/gene-IFIH1/gene-LLGL2
GO:0009948	anterior/posterior axis specification	4/257	100/10946	1.7	0.208194	0.733219	gene-EGFR/gene-IFIH1/gene-LLGL2/gene-ZNF821
GO:0050678	regulation of epithelial cell proliferation	6/257	170/10946	1.5	0.210367	0.733219	gene-LLGL2/gene-MCC/gene-MYDGF/gene-PGF/gene-SNAI1/gene-WWTR1
GO:0000712	resolution of meiotic recombination intermediates	1/257	10/10946	4.26	0.211551	0.733219	gene-MSH4
GO:0000912	assembly of actomyosin apparatus involved in cytokinesis	1/257	10/10946	4.26	0.211551	0.733219	gene-DLC1
GO:0002639	positive regulation of immunoglobulin production	1/257	10/10946	4.26	0.211551	0.733219	gene-TP53BP1
GO:0002693	positive regulation of cellular extravasation	1/257	10/10946	4.26	0.211551	0.733219	gene-FAM65C
GO:0003272	endocardial cushion formation	1/257	10/10946	4.26	0.211551	0.733219	gene-SNAI1
GO:0006517	protein deglycosylation	1/257	10/10946	4.26	0.211551	0.733219	gene-MAN2A1
GO:0007473	wing disc proximal/distal pattern formation	1/257	10/10946	4.26	0.211551	0.733219	gene-EGFR
GO:0007482	haltere development	1/257	10/10946	4.26	0.211551	0.733219	gene-EGFR
GO:0008101	BMP signaling pathway	1/257	10/10946	4.26	0.211551	0.733219	gene-GPC2
GO:0010762	regulation of fibroblast migration	1/257	10/10946	4.26	0.211551	0.733219	gene-FER
GO:0010826	negative regulation of centrosome duplication	1/257	10/10946	4.26	0.211551	0.733219	gene-BRCA1
GO:0010833	telomere maintenance via telomere lengthening	1/257	10/10946	4.26	0.211551	0.733219	gene-TERF2IP
GO:0016336	establishment or maintenance of polarity of larval imaginal disc epithelium	1/257	10/10946	4.26	0.211551	0.733219	gene-LLGL2
GO:0021681	cerebellar granular layer development	1/257	10/10946	4.26	0.211551	0.733219	gene-NRXN3
GO:0021683	cerebellar granular layer morphogenesis	1/257	10/10946	4.26	0.211551	0.733219	gene-NRXN3
GO:0031392	regulation of prostaglandin biosynthetic process	1/257	10/10946	4.26	0.211551	0.733219	gene-PLA2G4A
GO:0031394	positive regulation of prostaglandin biosynthetic process	1/257	10/10946	4.26	0.211551	0.733219	gene-PLA2G4A
GO:0031987	locomotion involved in locomotory behavior	1/257	10/10946	4.26	0.211551	0.733219	gene-ADGRL2
GO:0032369	negative regulation of lipid transport	1/257	10/10946	4.26	0.211551	0.733219	gene-NRG2
GO:0034389	lipid droplet organization	1/257	10/10946	4.26	0.211551	0.733219	gene-PLIN3
GO:0035036	sperm-egg recognition	1/257	10/10946	4.26	0.211551	0.733219	gene-UBAP2
GO:0035216	haltere disc development	1/257	10/10946	4.26	0.211551	0.733219	gene-EGFR
GO:0036010	protein localization to endosome	1/257	10/10946	4.26	0.211551	0.733219	gene-APBA1
GO:0042694	muscle cell fate specification	1/257	10/10946	4.26	0.211551	0.733219	gene-EGFR
GO:0043416	regulation of skeletal muscle tissue regeneration	1/257	10/10946	4.26	0.211551	0.733219	gene-BECN1
GO:0044821	meiotic telomere tethering at nuclear periphery	1/257	10/10946	4.26	0.211551	0.733219	gene-LOC121106525
GO:0045200	establishment of neuroblast polarity	1/257	10/10946	4.26	0.211551	0.733219	gene-LLGL2
GO:0045463	R8 cell development	1/257	10/10946	4.26	0.211551	0.733219	gene-KDM4B
GO:0046606	negative regulation of centrosome cycle	1/257	10/10946	4.26	0.211551	0.733219	gene-BRCA1
GO:0046663	dorsal closure, leading edge cell differentiation	1/257	10/10946	4.26	0.211551	0.733219	gene-ZNF821
GO:0051340	regulation of ligase activity	1/257	10/10946	4.26	0.211551	0.733219	gene-WWTR1
GO:0051490	negative regulation of filopodium assembly	1/257	10/10946	4.26	0.211551	0.733219	gene-NRXN3
GO:0060074	synapse maturation	1/257	10/10946	4.26	0.211551	0.733219	gene-NRXN3
GO:0060973	cell migration involved in heart development	1/257	10/10946	4.26	0.211551	0.733219	gene-SNAI1
GO:0061331	epithelial cell proliferation involved in Malpighian tubule morphogenesis	1/257	10/10946	4.26	0.211551	0.733219	gene-EGFR
GO:0070197	meiotic attachment of telomere to nuclear envelope	1/257	10/10946	4.26	0.211551	0.733219	gene-LOC121106525
GO:0070897	transcription preinitiation complex assembly	1/257	10/10946	4.26	0.211551	0.733219	gene-RRN3
GO:0071514	genetic imprinting	1/257	10/10946	4.26	0.211551	0.733219	gene-BRCA1
GO:0071624	positive regulation of granulocyte chemotaxis	1/257	10/10946	4.26	0.211551	0.733219	gene-FAM65C
GO:0086091	regulation of heart rate by cardiac conduction	1/257	10/10946	4.26	0.211551	0.733219	gene-PCNT
GO:0090023	positive regulation of neutrophil chemotaxis	1/257	10/10946	4.26	0.211551	0.733219	gene-FAM65C
GO:0090398	cellular senescence	1/257	10/10946	4.26	0.211551	0.733219	gene-BECN1
GO:0097118	neuroligin clustering involved in postsynaptic membrane assembly	1/257	10/10946	4.26	0.211551	0.733219	gene-NRXN3
GO:0097240	chromosome attachment to the nuclear envelope	1/257	10/10946	4.26	0.211551	0.733219	gene-LOC121106525
GO:1901998	toxin transport	1/257	10/10946	4.26	0.211551	0.733219	gene-GGA3
GO:1990535	neuron projection maintenance	1/257	10/10946	4.26	0.211551	0.733219	gene-MAP1A
GO:2000289	regulation of photoreceptor cell axon guidance	1/257	10/10946	4.26	0.211551	0.733219	gene-SEMA4D
GO:2000305	semaphorin-plexin signaling pathway involved in regulation of photoreceptor cell axon guidance	1/257	10/10946	4.26	0.211551	0.733219	gene-SEMA4D
GO:2000404	regulation of T cell migration	1/257	10/10946	4.26	0.211551	0.733219	gene-FAM65C
GO:2000765	regulation of cytoplasmic translation	1/257	10/10946	4.26	0.211551	0.733219	gene-DPH6
GO:2000810	regulation of bicellular tight junction assembly	1/257	10/10946	4.26	0.211551	0.733219	gene-SNAI1
GO:2000811	negative regulation of anoikis	1/257	10/10946	4.26	0.211551	0.733219	gene-SNAI1
GO:2001279	regulation of unsaturated fatty acid biosynthetic process	1/257	10/10946	4.26	0.211551	0.733219	gene-PLA2G4A
GO:2001280	positive regulation of unsaturated fatty acid biosynthetic process	1/257	10/10946	4.26	0.211551	0.733219	gene-PLA2G4A
GO:0006310	DNA recombination	4/257	101/10946	1.69	0.21311	0.733219	gene-BRCA1/gene-CNTD1/gene-LOC121106525/gene-LOC424727
GO:0072175	epithelial tube formation	4/257	101/10946	1.69	0.21311	0.733219	gene-DLC1/gene-GRHL3/gene-KDM2A/gene-TCTN3
GO:0051260	protein homooligomerization	6/257	171/10946	1.49	0.214086	0.733219	gene-FAM65C/gene-KCNA1/gene-KCNA5/gene-MPP2/gene-TP53BP1/gene-VWF
GO:0007274	neuromuscular synaptic transmission	3/257	68/10946	1.88	0.214147	0.733219	gene-DLC1/gene-NTF3/gene-TENM3
GO:1903076	regulation of protein localization to plasma membrane	3/257	68/10946	1.88	0.214147	0.733219	gene-NRXN3/gene-WNK4/gene-ZNF821
GO:0010160	formation of animal organ boundary	2/257	37/10946	2.3	0.215405	0.733219	gene-GPC2/gene-NTF3
GO:0010518	positive regulation of phospholipase activity	2/257	37/10946	2.3	0.215405	0.733219	gene-DLC1/gene-NTF3
GO:0042770	signal transduction in response to DNA damage	2/257	37/10946	2.3	0.215405	0.733219	gene-BRCA1/gene-GRB2
GO:0046824	positive regulation of nucleocytoplasmic transport	2/257	37/10946	2.3	0.215405	0.733219	gene-BRCA1/gene-CPSF7
GO:2000179	positive regulation of neural precursor cell proliferation	2/257	37/10946	2.3	0.215405	0.733219	gene-HDAC9/gene-PGF
GO:2000779	regulation of double-strand break repair	2/257	37/10946	2.3	0.215405	0.733219	gene-TERF2IP/gene-TP53BP1
GO:0051235	maintenance of location	5/257	136/10946	1.57	0.215508	0.733219	gene-LOC121106525/gene-LOC121108310/gene-PCNT/gene-PLIN3/gene-SGCZ
GO:0006325	chromatin organization	8/257	244/10946	1.4	0.215687	0.733219	gene-APBB3/gene-CCNO/gene-HDAC9/gene-KDM2A/gene-KDM4B/gene-LOC107049269/gene-LOC124416955/gene-SLF1
GO:0030111	regulation of Wnt signaling pathway	6/257	172/10946	1.49	0.217828	0.733219	gene-FER/gene-GPC2/gene-MCC/gene-SNAI1/gene-WNK4/gene-WWTR1
GO:1903829	positive regulation of cellular protein localization	6/257	172/10946	1.49	0.217828	0.733219	gene-BRCA1/gene-FAM65C/gene-MAP1A/gene-NRXN3/gene-PCNT/gene-WNK4
GO:0008217	regulation of blood pressure	4/257	102/10946	1.67	0.218058	0.733219	gene-MRGPRH/gene-PGF/gene-PTGS2/gene-WNK4
GO:0051494	negative regulation of cytoskeleton organization	4/257	102/10946	1.67	0.218058	0.733219	gene-BRCA1/gene-DLC1/gene-MAP1A/gene-SSH3
GO:0022604	regulation of cell morphogenesis	12/257	395/10946	1.29	0.218901	0.733219	gene-DLC1/gene-FAM151B/gene-FAM151BL/gene-FER/gene-FEZ1/gene-FGD5/gene-GRHL3/gene-LLGL2/gene-LOC121110409/gene-MAP1A/gene-SEMA4D/gene-SSH3
GO:0030307	positive regulation of cell growth	5/257	137/10946	1.55	0.219748	0.733219	gene-AKAP6/gene-KDM2A/gene-MAP1A/gene-NRG2/gene-SLC44A5
GO:0032269	negative regulation of cellular protein metabolic process	14/257	472/10946	1.26	0.220114	0.733219	gene-BRCA1/gene-FLRT2/gene-GABARAPL2/gene-KDM4B/gene-LLGL2/gene-MAP1A/gene-NTF3/gene-PATL1/gene-PHLPP2/gene-SLF1/gene-TERF2IP/gene-TNFAIP8L1/gene-WNK4/gene-ZNF821
GO:0090263	positive regulation of canonical Wnt signaling pathway	3/257	69/10946	1.85	0.220305	0.733219	gene-GPC2/gene-WNK4/gene-WWTR1
GO:0060249	anatomical structure homeostasis	8/257	246/10946	1.39	0.22194	0.733219	gene-DLC1/gene-EGFR/gene-MAP1A/gene-PLA2G4A/gene-SGCZ/gene-TERF2IP/gene-WWTR1/gene-ZNF821
GO:0006952	defense response	14/257	473/10946	1.26	0.222366	0.733219	gene-ANKHD1/gene-ARHGEF5/gene-BECN1/gene-CORO1B/gene-FER/gene-GRB2/gene-HDAC9/gene-IFIH1/gene-IFNKL1/gene-LOC768614/gene-LOC776018/gene-PLA2G4A/gene-SHC3/gene-TNFAIP8L1
GO:0007605	sensory perception of sound	5/257	138/10946	1.54	0.224014	0.733219	gene-FAM65C/gene-MAP1A/gene-PCNT/gene-SNAI1/gene-TMEM132A
GO:0043604	amide biosynthetic process	5/257	138/10946	1.54	0.224014	0.733219	gene-CERS4/gene-MRPS7/gene-PATL1/gene-SELENOT/gene-SLC25A1
GO:0001941	postsynaptic membrane organization	2/257	38/10946	2.24	0.224089	0.733219	gene-NRXN3/gene-TENM3
GO:0010842	retina layer formation	2/257	38/10946	2.24	0.224089	0.733219	gene-LOC121108310/gene-MEGF10
GO:0016051	carbohydrate biosynthetic process	2/257	38/10946	2.24	0.224089	0.733219	gene-G6PC/gene-SLC25A1
GO:0016318	ommatidial rotation	2/257	38/10946	2.24	0.224089	0.733219	gene-EGFR/gene-ZNF821
GO:0031646	positive regulation of nervous system process	2/257	38/10946	2.24	0.224089	0.733219	gene-NRXN3/gene-TENM3
GO:0031952	regulation of protein autophosphorylation	2/257	38/10946	2.24	0.224089	0.733219	gene-NRG2/gene-PGF
GO:0048190	wing disc dorsal/ventral pattern formation	2/257	38/10946	2.24	0.224089	0.733219	gene-GPC2/gene-ZNF821
GO:0071158	positive regulation of cell cycle arrest	2/257	38/10946	2.24	0.224089	0.733219	gene-BRCA1/gene-FAM65C
GO:1902692	regulation of neuroblast proliferation	2/257	38/10946	2.24	0.224089	0.733219	gene-LLGL2/gene-PGF
GO:0031400	negative regulation of protein modification process	10/257	322/10946	1.32	0.225957	0.733219	gene-BRCA1/gene-FLRT2/gene-KDM4B/gene-LLGL2/gene-NTF3/gene-PHLPP2/gene-SLF1/gene-TERF2IP/gene-WNK4/gene-ZNF821
GO:0021954	central nervous system neuron development	3/257	70/10946	1.83	0.226498	0.733219	gene-CDH10/gene-SLC4A9/gene-TCTN3
GO:0048645	animal organ formation	3/257	70/10946	1.83	0.226498	0.733219	gene-GPC2/gene-NTF3/gene-WWTR1
GO:1903828	negative regulation of cellular protein localization	3/257	70/10946	1.83	0.226498	0.733219	gene-FAM65C/gene-MAP1A/gene-ZNF821
GO:0001539	cilium or flagellum-dependent cell motility	1/257	11/10946	3.87	0.23008	0.733219	gene-PCNT
GO:0002714	positive regulation of B cell mediated immunity	1/257	11/10946	3.87	0.23008	0.733219	gene-TP53BP1
GO:0002891	positive regulation of immunoglobulin mediated immune response	1/257	11/10946	3.87	0.23008	0.733219	gene-TP53BP1
GO:0006726	eye pigment biosynthetic process	1/257	11/10946	3.87	0.23008	0.733219	gene-MAN2A1
GO:0006896	Golgi to vacuole transport	1/257	11/10946	3.87	0.23008	0.733219	gene-AP1G1
GO:0007270	neuron-neuron synaptic transmission	1/257	11/10946	3.87	0.23008	0.733219	gene-APBA1
GO:0007445	determination of imaginal disc primordium	1/257	11/10946	3.87	0.23008	0.733219	gene-EGFR
GO:0010880	regulation of release of sequestered calcium ion into cytosol by sarcoplasmic reticulum	1/257	11/10946	3.87	0.23008	0.733219	gene-AKAP6
GO:0015693	magnesium ion transport	1/257	11/10946	3.87	0.23008	0.733219	gene-NIPAL3
GO:0015800	acidic amino acid transport	1/257	11/10946	3.87	0.23008	0.733219	gene-APBA1
GO:0019336	phenol-containing compound catabolic process	1/257	11/10946	3.87	0.23008	0.733219	gene-DIO2
GO:0021817	nucleokinesis involved in cell motility in cerebral cortex radial glia guided migration	1/257	11/10946	3.87	0.23008	0.733219	gene-LOC121106525
GO:0021903	rostrocaudal neural tube patterning	1/257	11/10946	3.87	0.23008	0.733219	gene-KDM2A
GO:0021904	dorsal/ventral neural tube patterning	1/257	11/10946	3.87	0.23008	0.733219	gene-TCTN3
GO:0022010	central nervous system myelination	1/257	11/10946	3.87	0.23008	0.733219	gene-TENM3
GO:0030730	sequestering of triglyceride	1/257	11/10946	3.87	0.23008	0.733219	gene-PLIN3
GO:0032291	axon ensheathment in central nervous system	1/257	11/10946	3.87	0.23008	0.733219	gene-TENM3
GO:0032331	negative regulation of chondrocyte differentiation	1/257	11/10946	3.87	0.23008	0.733219	gene-SNAI1
GO:0032801	receptor catabolic process	1/257	11/10946	3.87	0.23008	0.733219	gene-BECN1
GO:0033004	negative regulation of mast cell activation	1/257	11/10946	3.87	0.23008	0.733219	gene-FER
GO:0033197	response to vitamin E	1/257	11/10946	3.87	0.23008	0.733219	gene-BECN1
GO:0033866	nucleoside bisphosphate biosynthetic process	1/257	11/10946	3.87	0.23008	0.733219	gene-SLC25A1
GO:0034030	ribonucleoside bisphosphate biosynthetic process	1/257	11/10946	3.87	0.23008	0.733219	gene-SLC25A1
GO:0034033	purine nucleoside bisphosphate biosynthetic process	1/257	11/10946	3.87	0.23008	0.733219	gene-SLC25A1
GO:0034398	telomere tethering at nuclear periphery	1/257	11/10946	3.87	0.23008	0.733219	gene-LOC121106525
GO:0035071	salivary gland cell autophagic cell death	1/257	11/10946	3.87	0.23008	0.733219	gene-LLGL2
GO:0035225	determination of genital disc primordium	1/257	11/10946	3.87	0.23008	0.733219	gene-EGFR
GO:0035269	protein O-linked mannosylation	1/257	11/10946	3.87	0.23008	0.733219	gene-SDF2L1
GO:0035310	notum cell fate specification	1/257	11/10946	3.87	0.23008	0.733219	gene-EGFR
GO:0035965	cardiolipin acyl-chain remodeling	1/257	11/10946	3.87	0.23008	0.733219	gene-PLA2G4A
GO:0039531	regulation of viral-induced cytoplasmic pattern recognition receptor signaling pathway	1/257	11/10946	3.87	0.23008	0.733219	gene-ANKHD1
GO:0039535	regulation of RIG-I signaling pathway	1/257	11/10946	3.87	0.23008	0.733219	gene-ANKHD1
GO:0042441	eye pigment metabolic process	1/257	11/10946	3.87	0.23008	0.733219	gene-MAN2A1
GO:0042676	compound eye cone cell fate commitment	1/257	11/10946	3.87	0.23008	0.733219	gene-EGFR
GO:0043304	regulation of mast cell degranulation	1/257	11/10946	3.87	0.23008	0.733219	gene-FER
GO:0043324	pigment metabolic process involved in developmental pigmentation	1/257	11/10946	3.87	0.23008	0.733219	gene-MAN2A1
GO:0043474	pigment metabolic process involved in pigmentation	1/257	11/10946	3.87	0.23008	0.733219	gene-MAN2A1
GO:0043578	nuclear matrix organization	1/257	11/10946	3.87	0.23008	0.733219	gene-LOC121106525
GO:0043928	exonucleolytic catabolism of deadenylated mRNA	1/257	11/10946	3.87	0.23008	0.733219	gene-PATL1
GO:0044784	metaphase/anaphase transition of cell cycle	1/257	11/10946	3.87	0.23008	0.733219	gene-DLC1
GO:0045123	cellular extravasation	1/257	11/10946	3.87	0.23008	0.733219	gene-FER
GO:0045141	meiotic telomere clustering	1/257	11/10946	3.87	0.23008	0.733219	gene-LOC121106525
GO:0045191	regulation of isotype switching	1/257	11/10946	3.87	0.23008	0.733219	gene-TP53BP1
GO:0045911	positive regulation of DNA recombination	1/257	11/10946	3.87	0.23008	0.733219	gene-TP53BP1
GO:0045980	negative regulation of nucleotide metabolic process	1/257	11/10946	3.87	0.23008	0.733219	gene-HDAC9
GO:0046666	retinal cell programmed cell death	1/257	11/10946	3.87	0.23008	0.733219	gene-SLC4A9
GO:0046855	inositol phosphate dephosphorylation	1/257	11/10946	3.87	0.23008	0.733219	gene-PTEN
GO:0048790	maintenance of presynaptic active zone structure	1/257	11/10946	3.87	0.23008	0.733219	gene-TENM3
GO:0051782	negative regulation of cell division	1/257	11/10946	3.87	0.23008	0.733219	gene-FER
GO:0060236	regulation of mitotic spindle organization	1/257	11/10946	3.87	0.23008	0.733219	gene-FAM65C
GO:0060253	negative regulation of glial cell proliferation	1/257	11/10946	3.87	0.23008	0.733219	gene-CERS4
GO:0060602	branch elongation of an epithelium	1/257	11/10946	3.87	0.23008	0.733219	gene-WWTR1
GO:0060674	placenta blood vessel development	1/257	11/10946	3.87	0.23008	0.733219	gene-LLGL2
GO:0060836	lymphatic endothelial cell differentiation	1/257	11/10946	3.87	0.23008	0.733219	gene-PROX2
GO:0070562	regulation of vitamin D receptor signaling pathway	1/257	11/10946	3.87	0.23008	0.733219	gene-SNAI1
GO:0071107	response to parathyroid hormone	1/257	11/10946	3.87	0.23008	0.733219	gene-HDAC9
GO:0071374	cellular response to parathyroid hormone stimulus	1/257	11/10946	3.87	0.23008	0.733219	gene-HDAC9
GO:0071404	cellular response to low-density lipoprotein particle stimulus	1/257	11/10946	3.87	0.23008	0.733219	gene-CD9
GO:0071712	ER-associated misfolded protein catabolic process	1/257	11/10946	3.87	0.23008	0.733219	gene-SDF2L1
GO:0090220	chromosome localization to nuclear envelope involved in homologous chromosome segregation	1/257	11/10946	3.87	0.23008	0.733219	gene-LOC121106525
GO:0090286	obsolete cytoskeletal anchoring at nuclear membrane	1/257	11/10946	3.87	0.23008	0.733219	gene-LOC121106525
GO:0090292	nuclear matrix anchoring at nuclear membrane	1/257	11/10946	3.87	0.23008	0.733219	gene-LOC121106525
GO:0097106	postsynaptic density organization	1/257	11/10946	3.87	0.23008	0.733219	gene-NRXN3
GO:0099084	postsynaptic specialization organization	1/257	11/10946	3.87	0.23008	0.733219	gene-NRXN3
GO:1900119	positive regulation of execution phase of apoptosis	1/257	11/10946	3.87	0.23008	0.733219	gene-DLC1
GO:1900543	negative regulation of purine nucleotide metabolic process	1/257	11/10946	3.87	0.23008	0.733219	gene-HDAC9
GO:1902894	negative regulation of pri-miRNA transcription by RNA polymerase II	1/257	11/10946	3.87	0.23008	0.733219	gene-HDAC9
GO:1903361	protein localization to basolateral plasma membrane	1/257	11/10946	3.87	0.23008	0.733219	gene-APBA1
GO:2000042	negative regulation of double-strand break repair via homologous recombination	1/257	11/10946	3.87	0.23008	0.733219	gene-TP53BP1
GO:2000209	regulation of anoikis	1/257	11/10946	3.87	0.23008	0.733219	gene-SNAI1
GO:2000649	regulation of sodium ion transmembrane transporter activity	1/257	11/10946	3.87	0.23008	0.733219	gene-WNK4
GO:0010595	positive regulation of endothelial cell migration	3/257	71/10946	1.8	0.232725	0.733219	gene-HDAC9/gene-PGF/gene-SNAI1
GO:0035218	leg disc development	3/257	71/10946	1.8	0.232725	0.733219	gene-ARHGEF5/gene-EGFR/gene-GPC2
GO:0007591	molting cycle, chitin-based cuticle	2/257	39/10946	2.18	0.232799	0.733219	gene-GPC2/gene-LLGL2
GO:0042446	hormone biosynthetic process	2/257	39/10946	2.18	0.232799	0.733219	gene-DIO2/gene-SLC44A5
GO:0045446	endothelial cell differentiation	2/257	39/10946	2.18	0.232799	0.733219	gene-NRG2/gene-PROX2
GO:0048619	embryonic hindgut morphogenesis	2/257	39/10946	2.18	0.232799	0.733219	gene-DLC1/gene-EGFR
GO:0051457	maintenance of protein location in nucleus	2/257	39/10946	2.18	0.232799	0.733219	gene-LOC121106525/gene-LOC121108310
GO:1903051	negative regulation of proteolysis involved in cellular protein catabolic process	2/257	39/10946	2.18	0.232799	0.733219	gene-GABARAPL2/gene-MAP1A
GO:1903530	regulation of secretion by cell	12/257	401/10946	1.27	0.233799	0.733219	gene-APBB3/gene-ARHGEF5/gene-FER/gene-FEZ1/gene-G6PC/gene-IFIH1/gene-LLGL2/gene-MRGPRH/gene-NRG2/gene-PGF/gene-SELENOT/gene-SNAP29
GO:0030031	cell projection assembly	8/257	250/10946	1.36	0.234644	0.733219	gene-EGFR/gene-FGD5/gene-LLGL2/gene-PCNT/gene-TCTN3/gene-TMEM216/gene-TMEM231/gene-WWTR1
GO:0010634	positive regulation of epithelial cell migration	4/257	106/10946	1.61	0.238147	0.733219	gene-HDAC9/gene-PGF/gene-SNAI1/gene-ZNF821
GO:1904018	positive regulation of vasculature development	4/257	106/10946	1.61	0.238147	0.733219	gene-BRCA1/gene-HDAC9/gene-MYDGF/gene-PGF
GO:0006820	anion transport	7/257	214/10946	1.39	0.238214	0.733219	gene-APBA1/gene-G6PC/gene-PLA2G4A/gene-PLIN3/gene-SLC25A1/gene-SLC44A5/gene-SLC4A9
GO:1903050	regulation of proteolysis involved in cellular protein catabolic process	3/257	72/10946	1.77	0.238983	0.733219	gene-GABARAPL2/gene-MAP1A/gene-RNF114
GO:1904064	positive regulation of cation transmembrane transport	3/257	72/10946	1.77	0.238983	0.733219	gene-AKAP6/gene-PCNT/gene-WNK4
GO:0061138	morphogenesis of a branching epithelium	5/257	142/10946	1.5	0.24132	0.733219	gene-GRB2/gene-GRHL3/gene-KDM4B/gene-LLGL2/gene-WWTR1
GO:0001752	compound eye photoreceptor fate commitment	2/257	40/10946	2.13	0.241529	0.733219	gene-EGFR/gene-GRHL3
GO:0007450	dorsal/ventral pattern formation, imaginal disc	2/257	40/10946	2.13	0.241529	0.733219	gene-GPC2/gene-ZNF821
GO:0014032	neural crest cell development	2/257	40/10946	2.13	0.241529	0.733219	gene-NRG2/gene-SNAI1
GO:0030148	sphingolipid biosynthetic process	2/257	40/10946	2.13	0.241529	0.733219	gene-CERS4/gene-HACD4
GO:0043277	apoptotic cell clearance	2/257	40/10946	2.13	0.241529	0.733219	gene-BECN1/gene-MEGF10
GO:0090598	male anatomical structure morphogenesis	2/257	40/10946	2.13	0.241529	0.733219	gene-BECN1/gene-TCF4
GO:0048871	multicellular organismal homeostasis	7/257	215/10946	1.39	0.241726	0.733219	gene-DLC1/gene-EGFR/gene-GRHL3/gene-MAP1A/gene-PLA2G4A/gene-WWTR1/gene-ZNF821
GO:0051259	protein complex oligomerization	7/257	215/10946	1.39	0.241726	0.733219	gene-CPSF7/gene-FAM65C/gene-GRB2/gene-MPP2/gene-NBR1/gene-TP53BP1/gene-VWF
GO:0043473	pigmentation	4/257	107/10946	1.59	0.243237	0.733219	gene-GPC2/gene-HPS3/gene-MAN2A1/gene-SNAI1
GO:0048738	cardiac muscle tissue development	4/257	107/10946	1.59	0.243237	0.733219	gene-NRG2/gene-PROX2/gene-SGCZ/gene-TENM3
GO:0030336	negative regulation of cell migration	6/257	179/10946	1.43	0.244614	0.733219	gene-CERS4/gene-DLC1/gene-FAM65C/gene-HDAC9/gene-LLGL2/gene-MCC
GO:0031110	regulation of microtubule polymerization or depolymerization	3/257	73/10946	1.75	0.245269	0.733219	gene-FER/gene-MAP1A/gene-PCNT
GO:0034767	positive regulation of ion transmembrane transport	3/257	73/10946	1.75	0.245269	0.733219	gene-AKAP6/gene-PCNT/gene-WNK4
GO:0046425	regulation of receptor signaling pathway via JAK-STAT	3/257	73/10946	1.75	0.245269	0.733219	gene-FLRT2/gene-UBAP2/gene-ZNF821
GO:0050680	negative regulation of epithelial cell proliferation	3/257	73/10946	1.75	0.245269	0.733219	gene-LLGL2/gene-MCC/gene-SNAI1
GO:1904892	regulation of receptor signaling pathway via STAT	3/257	73/10946	1.75	0.245269	0.733219	gene-FLRT2/gene-UBAP2/gene-ZNF821
GO:0030902	hindbrain development	5/257	143/10946	1.49	0.245703	0.733219	gene-DLC1/gene-KDM2A/gene-NRXN3/gene-PCNT/gene-SLC4A9
GO:0000083	regulation of transcription involved in G1/S transition of mitotic cell cycle	1/257	12/10946	3.55	0.248175	0.733219	gene-CCNO
GO:0001742	oenocyte differentiation	1/257	12/10946	3.55	0.248175	0.733219	gene-EGFR
GO:0003157	endocardium development	1/257	12/10946	3.55	0.248175	0.733219	gene-NRG2
GO:0006278	RNA-dependent DNA biosynthetic process	1/257	12/10946	3.55	0.248175	0.733219	gene-TERF2IP
GO:0006359	regulation of transcription by RNA polymerase III	1/257	12/10946	3.55	0.248175	0.733219	gene-BRCA1
GO:0006379	mRNA cleavage	1/257	12/10946	3.55	0.248175	0.733219	gene-CPSF7
GO:0006663	platelet activating factor biosynthetic process	1/257	12/10946	3.55	0.248175	0.733219	gene-PLA2G4A
GO:0006991	response to sterol depletion	1/257	12/10946	3.55	0.248175	0.733219	gene-CERS4
GO:0007141	male meiosis I	1/257	12/10946	3.55	0.248175	0.733219	gene-CCNO
GO:0007339	binding of sperm to zona pellucida	1/257	12/10946	3.55	0.248175	0.733219	gene-UBAP2
GO:0007395	dorsal closure, spreading of leading edge cells	1/257	12/10946	3.55	0.248175	0.733219	gene-EGFR
GO:0008089	anterograde axonal transport	1/257	12/10946	3.55	0.248175	0.733219	gene-MAP1A
GO:0009069	serine family amino acid metabolic process	1/257	12/10946	3.55	0.248175	0.733219	gene-BAAT
GO:0010972	negative regulation of G2/M transition of mitotic cell cycle	1/257	12/10946	3.55	0.248175	0.733219	gene-BRCA1
GO:0030536	larval feeding behavior	1/257	12/10946	3.55	0.248175	0.733219	gene-MRGPRH
GO:0031340	positive regulation of vesicle fusion	1/257	12/10946	3.55	0.248175	0.733219	gene-PLA2G4A
GO:0032509	endosome transport via multivesicular body sorting pathway	1/257	12/10946	3.55	0.248175	0.733219	gene-VPS37C
GO:0032933	SREBP signaling pathway	1/257	12/10946	3.55	0.248175	0.733219	gene-CERS4
GO:0033145	positive regulation of intracellular steroid hormone receptor signaling pathway	1/257	12/10946	3.55	0.248175	0.733219	gene-WWTR1
GO:0033522	histone H2A ubiquitination	1/257	12/10946	3.55	0.248175	0.733219	gene-KDM2A
GO:0034397	telomere localization	1/257	12/10946	3.55	0.248175	0.733219	gene-LOC121106525
GO:0034643	establishment of mitochondrion localization, microtubule-mediated	1/257	12/10946	3.55	0.248175	0.733219	gene-MAP1A
GO:0035070	salivary gland histolysis	1/257	12/10946	3.55	0.248175	0.733219	gene-LLGL2
GO:0035090	maintenance of apical/basal cell polarity	1/257	12/10946	3.55	0.248175	0.733219	gene-LLGL2
GO:0035153	epithelial cell type specification, open tracheal system	1/257	12/10946	3.55	0.248175	0.733219	gene-KDM4B
GO:0035518	histone H2A monoubiquitination	1/257	12/10946	3.55	0.248175	0.733219	gene-KDM2A
GO:0036099	female germ-line stem cell population maintenance	1/257	12/10946	3.55	0.248175	0.733219	gene-RRN3
GO:0038110	interleukin-2-mediated signaling pathway	1/257	12/10946	3.55	0.248175	0.733219	gene-SHC3
GO:0045922	negative regulation of fatty acid metabolic process	1/257	12/10946	3.55	0.248175	0.733219	gene-BRCA1
GO:0046475	glycerophospholipid catabolic process	1/257	12/10946	3.55	0.248175	0.733219	gene-PLA2G4A
GO:0046845	branched duct epithelial cell fate determination, open tracheal system	1/257	12/10946	3.55	0.248175	0.733219	gene-EGFR
GO:0046847	filopodium assembly	1/257	12/10946	3.55	0.248175	0.733219	gene-FGD5
GO:0048138	germ-line cyst encapsulation	1/257	12/10946	3.55	0.248175	0.733219	gene-EGFR
GO:0048139	female germ-line cyst encapsulation	1/257	12/10946	3.55	0.248175	0.733219	gene-EGFR
GO:0048714	positive regulation of oligodendrocyte differentiation	1/257	12/10946	3.55	0.248175	0.733219	gene-TENM3
GO:0048840	otolith development	1/257	12/10946	3.55	0.248175	0.733219	gene-SLC44A5
GO:0051597	response to methylmercury	1/257	12/10946	3.55	0.248175	0.733219	gene-PLA2G4A
GO:0051645	Golgi localization	1/257	12/10946	3.55	0.248175	0.733219	gene-FAM65C
GO:0055094	response to lipoprotein particle	1/257	12/10946	3.55	0.248175	0.733219	gene-CD9
GO:0060285	cilium-dependent cell motility	1/257	12/10946	3.55	0.248175	0.733219	gene-PCNT
GO:0060384	innervation	1/257	12/10946	3.55	0.248175	0.733219	gene-NTF3
GO:0060706	cell differentiation involved in embryonic placenta development	1/257	12/10946	3.55	0.248175	0.733219	gene-GRHL3
GO:0060911	cardiac cell fate commitment	1/257	12/10946	3.55	0.248175	0.733219	gene-TENM3
GO:0062033	positive regulation of mitotic sister chromatid segregation	1/257	12/10946	3.55	0.248175	0.733219	gene-BECN1
GO:0070932	histone H3 deacetylation	1/257	12/10946	3.55	0.248175	0.733219	gene-HDAC9
GO:0071205	protein localization to juxtaparanode region of axon	1/257	12/10946	3.55	0.248175	0.733219	gene-CNTNAP1
GO:0071402	cellular response to lipoprotein particle stimulus	1/257	12/10946	3.55	0.248175	0.733219	gene-CD9
GO:0071501	cellular response to sterol depletion	1/257	12/10946	3.55	0.248175	0.733219	gene-CERS4
GO:0071625	vocalization behavior	1/257	12/10946	3.55	0.248175	0.733219	gene-NRXN3
GO:0072697	protein localization to cell cortex	1/257	12/10946	3.55	0.248175	0.733219	gene-LLGL2
GO:0090037	positive regulation of protein kinase C signaling	1/257	12/10946	3.55	0.248175	0.733219	gene-PHLPP2
GO:0090594	inflammatory response to wounding	1/257	12/10946	3.55	0.248175	0.733219	gene-PLA2G4A
GO:0098728	germline stem cell asymmetric division	1/257	12/10946	3.55	0.248175	0.733219	gene-GPC2
GO:0099623	regulation of cardiac muscle cell membrane repolarization	1/257	12/10946	3.55	0.248175	0.733219	gene-PCNT
GO:1903358	regulation of Golgi organization	1/257	12/10946	3.55	0.248175	0.733219	gene-PCNT
GO:1905606	regulation of presynapse assembly	1/257	12/10946	3.55	0.248175	0.733219	gene-NRXN3
GO:1905881	positive regulation of oogenesis	1/257	12/10946	3.55	0.248175	0.733219	gene-ZNF821
GO:2000331	regulation of terminal button organization	1/257	12/10946	3.55	0.248175	0.733219	gene-TENM3
GO:2000846	regulation of corticosteroid hormone secretion	1/257	12/10946	3.55	0.248175	0.733219	gene-NRG2
GO:0007098	centrosome cycle	4/257	108/10946	1.58	0.248352	0.733219	gene-BRCA1/gene-FER/gene-LOC121108310/gene-PCNT
GO:1902905	positive regulation of supramolecular fiber organization	4/257	108/10946	1.58	0.248352	0.733219	gene-FER/gene-GRB2/gene-MAP1A/gene-PCNT
GO:0006023	aminoglycan biosynthetic process	2/257	41/10946	2.08	0.250273	0.733219	gene-CHST4/gene-CHST6
GO:0007338	single fertilization	2/257	41/10946	2.08	0.250273	0.733219	gene-CD9/gene-UBAP2
GO:0009409	response to cold	2/257	41/10946	2.08	0.250273	0.733219	gene-CDH10/gene-VWF
GO:0009914	hormone transport	2/257	41/10946	2.08	0.250273	0.733219	gene-SELENOT/gene-SLC44A5
GO:0010517	regulation of phospholipase activity	2/257	41/10946	2.08	0.250273	0.733219	gene-DLC1/gene-NTF3
GO:0015908	fatty acid transport	2/257	41/10946	2.08	0.250273	0.733219	gene-PLA2G4A/gene-PLIN3
GO:0042706	eye photoreceptor cell fate commitment	2/257	41/10946	2.08	0.250273	0.733219	gene-EGFR/gene-GRHL3
GO:0060193	positive regulation of lipase activity	2/257	41/10946	2.08	0.250273	0.733219	gene-DLC1/gene-NTF3
GO:0021675	nerve development	3/257	74/10946	1.73	0.251581	0.733219	gene-CNTNAP1/gene-CNTNAP2/gene-NTF3
GO:0031398	positive regulation of protein ubiquitination	3/257	74/10946	1.73	0.251581	0.733219	gene-BRCA1/gene-KDM2A/gene-LOC121108310
GO:0014706	striated muscle tissue development	6/257	181/10946	1.41	0.252442	0.733219	gene-FAM65C/gene-MEGF10/gene-NRG2/gene-PROX2/gene-SGCZ/gene-TENM3
GO:0051707	response to other organism	11/257	370/10946	1.27	0.253173	0.733219	gene-ADGRL2/gene-ANKHD1/gene-BECN1/gene-CORO1B/gene-FER/gene-HMCN1/gene-IFIH1/gene-PLA2G4A/gene-SHC3/gene-TNFAIP8L1/gene-VWF
GO:0031334	positive regulation of protein-containing complex assembly	4/257	109/10946	1.56	0.25349	0.733219	gene-FER/gene-GRB2/gene-MAP1A/gene-PCNT
GO:0071695	anatomical structure maturation	4/257	109/10946	1.56	0.25349	0.733219	gene-ANKHD1/gene-BECN1/gene-CNTNAP1/gene-CNTNAP2
GO:0045165	cell fate commitment	10/257	333/10946	1.28	0.257113	0.733219	gene-EGFR/gene-GRHL3/gene-KDM4B/gene-LLGL2/gene-NTF3/gene-TCF4/gene-TENM3/gene-WWTR1/gene-ZFYVE16/gene-ZNF821
GO:0071248	cellular response to metal ion	3/257	75/10946	1.7	0.257917	0.733219	gene-BECN1/gene-NRXN3/gene-WNK4
GO:0071478	cellular response to radiation	3/257	75/10946	1.7	0.257917	0.733219	gene-GRB2/gene-SNAI1/gene-WWTR1
GO:1904375	regulation of protein localization to cell periphery	3/257	75/10946	1.7	0.257917	0.733219	gene-NRXN3/gene-WNK4/gene-ZNF821
GO:0016579	protein deubiquitination	4/257	110/10946	1.55	0.25865	0.733219	gene-BECN1/gene-BRCA1/gene-CCNO/gene-IFIH1
GO:0051091	positive regulation of DNA-binding transcription factor activity	4/257	110/10946	1.55	0.25865	0.733219	gene-FER/gene-HDAC9/gene-TERF2IP/gene-TP53BP1
GO:0019217	regulation of fatty acid metabolic process	2/257	42/10946	2.03	0.259027	0.733219	gene-BRCA1/gene-PLA2G4A
GO:0046552	photoreceptor cell fate commitment	2/257	42/10946	2.03	0.259027	0.733219	gene-EGFR/gene-GRHL3
GO:0051453	regulation of intracellular pH	2/257	42/10946	2.03	0.259027	0.733219	gene-SLC4A9/gene-SLC9A8
GO:1903078	positive regulation of protein localization to plasma membrane	2/257	42/10946	2.03	0.259027	0.733219	gene-NRXN3/gene-WNK4
GO:0071417	cellular response to organonitrogen compound	9/257	296/10946	1.3	0.260811	0.733219	gene-AKAP6/gene-BRCA1/gene-DLC1/gene-FER/gene-GRB2/gene-HDAC9/gene-MAP1A/gene-PCNT/gene-SHC3
GO:0043207	response to external biotic stimulus	11/257	373/10946	1.26	0.261401	0.733219	gene-ADGRL2/gene-ANKHD1/gene-BECN1/gene-CORO1B/gene-FER/gene-HMCN1/gene-IFIH1/gene-PLA2G4A/gene-SHC3/gene-TNFAIP8L1/gene-VWF
GO:0051493	regulation of cytoskeleton organization	10/257	335/10946	1.27	0.262931	0.733219	gene-BRCA1/gene-DLC1/gene-FAM65C/gene-FER/gene-GRB2/gene-MAP1A/gene-NTF3/gene-PCNT/gene-SSH3/gene-TNFAIP8L1
GO:0021915	neural tube development	4/257	111/10946	1.53	0.263831	0.733219	gene-DLC1/gene-GRHL3/gene-KDM2A/gene-TCTN3
GO:0001568	blood vessel development	8/257	259/10946	1.32	0.264109	0.733219	gene-ANKHD1/gene-BECN1/gene-HDAC9/gene-LLGL2/gene-NRXN3/gene-PGF/gene-SHC3/gene-WWTR1
GO:0035108	limb morphogenesis	3/257	76/10946	1.68	0.264275	0.733219	gene-GRHL3/gene-PCNT/gene-TMEM231
GO:0090316	positive regulation of intracellular protein transport	3/257	76/10946	1.68	0.264275	0.733219	gene-BRCA1/gene-FAM65C/gene-PCNT
GO:0001554	luteolysis	1/257	13/10946	3.28	0.265847	0.733219	gene-PLA2G4A
GO:0007091	metaphase/anaphase transition of mitotic cell cycle	1/257	13/10946	3.28	0.265847	0.733219	gene-DLC1
GO:0007171	activation of transmembrane receptor protein tyrosine kinase activity	1/257	13/10946	3.28	0.265847	0.733219	gene-NRG2
GO:0007479	leg disc proximal/distal pattern formation	1/257	13/10946	3.28	0.265847	0.733219	gene-EGFR
GO:0010390	histone monoubiquitination	1/257	13/10946	3.28	0.265847	0.733219	gene-KDM2A
GO:0010800	positive regulation of peptidyl-threonine phosphorylation	1/257	13/10946	3.28	0.265847	0.733219	gene-WNK4
GO:0015074	DNA integration	1/257	13/10946	3.28	0.265847	0.733219	gene-ENS-3
GO:0016335	morphogenesis of larval imaginal disc epithelium	1/257	13/10946	3.28	0.265847	0.733219	gene-LLGL2
GO:0021548	pons development	1/257	13/10946	3.28	0.265847	0.733219	gene-SLC4A9
GO:0030149	sphingolipid catabolic process	1/257	13/10946	3.28	0.265847	0.733219	gene-PDXDC1
GO:0030473	nuclear migration along microtubule	1/257	13/10946	3.28	0.265847	0.733219	gene-LOC121106525
GO:0030903	notochord development	1/257	13/10946	3.28	0.265847	0.733219	gene-WWTR1
GO:0032048	cardiolipin metabolic process	1/257	13/10946	3.28	0.265847	0.733219	gene-PLA2G4A
GO:0032435	negative regulation of proteasomal ubiquitin-dependent protein catabolic process	1/257	13/10946	3.28	0.265847	0.733219	gene-MAP1A
GO:0033158	obsolete regulation of protein import into nucleus, translocation	1/257	13/10946	3.28	0.265847	0.733219	gene-BRCA1
GO:0033160	obsolete positive regulation of protein import into nucleus, translocation	1/257	13/10946	3.28	0.265847	0.733219	gene-BRCA1
GO:0034111	negative regulation of homotypic cell-cell adhesion	1/257	13/10946	3.28	0.265847	0.733219	gene-CD9
GO:0035026	leading edge cell differentiation	1/257	13/10946	3.28	0.265847	0.733219	gene-ZNF821
GO:0035223	leg disc pattern formation	1/257	13/10946	3.28	0.265847	0.733219	gene-EGFR
GO:0040039	inductive cell migration	1/257	13/10946	3.28	0.265847	0.733219	gene-TENM3
GO:0042130	negative regulation of T cell proliferation	1/257	13/10946	3.28	0.265847	0.733219	gene-FAM65C
GO:0043330	response to exogenous dsRNA	1/257	13/10946	3.28	0.265847	0.733219	gene-IFIH1
GO:0045445	myoblast differentiation	1/257	13/10946	3.28	0.265847	0.733219	gene-NRG2
GO:0045571	negative regulation of imaginal disc growth	1/257	13/10946	3.28	0.265847	0.733219	gene-UBAP2
GO:0050996	positive regulation of lipid catabolic process	1/257	13/10946	3.28	0.265847	0.733219	gene-PLIN3
GO:0051290	protein heterotetramerization	1/257	13/10946	3.28	0.265847	0.733219	gene-CPSF7
GO:0051481	negative regulation of cytosolic calcium ion concentration	1/257	13/10946	3.28	0.265847	0.733219	gene-MRGPRH
GO:0051654	establishment of mitochondrion localization	1/257	13/10946	3.28	0.265847	0.733219	gene-MAP1A
GO:0051973	positive regulation of telomerase activity	1/257	13/10946	3.28	0.265847	0.733219	gene-GRHL3
GO:0070121	Kupffer's vesicle development	1/257	13/10946	3.28	0.265847	0.733219	gene-LLGL2
GO:0070317	negative regulation of G0 to G1 transition	1/257	13/10946	3.28	0.265847	0.733219	gene-BRCA1
GO:0070417	cellular response to cold	1/257	13/10946	3.28	0.265847	0.733219	gene-VWF
GO:0070527	platelet aggregation	1/257	13/10946	3.28	0.265847	0.733219	gene-MEGF10
GO:0070669	response to interleukin-2	1/257	13/10946	3.28	0.265847	0.733219	gene-SHC3
GO:0070884	regulation of calcineurin-NFAT signaling cascade	1/257	13/10946	3.28	0.265847	0.733219	gene-AKAP6
GO:0071352	cellular response to interleukin-2	1/257	13/10946	3.28	0.265847	0.733219	gene-SHC3
GO:0072215	regulation of metanephros development	1/257	13/10946	3.28	0.265847	0.733219	gene-WWTR1
GO:0090331	negative regulation of platelet aggregation	1/257	13/10946	3.28	0.265847	0.733219	gene-CD9
GO:0097104	postsynaptic membrane assembly	1/257	13/10946	3.28	0.265847	0.733219	gene-NRXN3
GO:0106056	regulation of calcineurin-mediated signaling	1/257	13/10946	3.28	0.265847	0.733219	gene-AKAP6
GO:1902750	negative regulation of cell cycle G2/M phase transition	1/257	13/10946	3.28	0.265847	0.733219	gene-BRCA1
GO:1990839	response to endothelin	1/257	13/10946	3.28	0.265847	0.733219	gene-SHC3
GO:2000010	positive regulation of protein localization to cell surface	1/257	13/10946	3.28	0.265847	0.733219	gene-MAP1A
GO:2000831	regulation of steroid hormone secretion	1/257	13/10946	3.28	0.265847	0.733219	gene-NRG2
GO:0007611	learning or memory	9/257	298/10946	1.29	0.267029	0.733219	gene-APBB3/gene-EGFR/gene-HDAC9/gene-MAP1A/gene-NRG2/gene-NRXN3/gene-NTAN1/gene-NTF3/gene-SHC3
GO:0002687	positive regulation of leukocyte migration	2/257	43/10946	1.98	0.267784	0.733219	gene-FAM65C/gene-PGF
GO:0006024	glycosaminoglycan biosynthetic process	2/257	43/10946	1.98	0.267784	0.733219	gene-CHST4/gene-CHST6
GO:0006112	energy reserve metabolic process	2/257	43/10946	1.98	0.267784	0.733219	gene-BECN1/gene-G6PC
GO:0021955	central nervous system neuron axonogenesis	2/257	43/10946	1.98	0.267784	0.733219	gene-CDH10/gene-TCTN3
GO:0042133	neurotransmitter metabolic process	2/257	43/10946	1.98	0.267784	0.733219	gene-BAAT/gene-SLC44A5
GO:0042220	response to cocaine	2/257	43/10946	1.98	0.267784	0.733219	gene-ADGRL2/gene-HDAC9
GO:0043536	positive regulation of blood vessel endothelial cell migration	2/257	43/10946	1.98	0.267784	0.733219	gene-HDAC9/gene-PGF
GO:0051647	nucleus localization	2/257	43/10946	1.98	0.267784	0.733219	gene-LOC121106525/gene-SSH3
GO:2000058	regulation of ubiquitin-dependent protein catabolic process	2/257	43/10946	1.98	0.267784	0.733219	gene-MAP1A/gene-RNF114
GO:0002119	nematode larval development	4/257	112/10946	1.52	0.269032	0.733219	gene-APBB3/gene-BECN1/gene-LOC121106525/gene-TCF4
GO:0007447	imaginal disc pattern formation	3/257	77/10946	1.66	0.270652	0.733219	gene-EGFR/gene-GPC2/gene-ZNF821
GO:0016525	negative regulation of angiogenesis	3/257	77/10946	1.66	0.270652	0.733219	gene-DLC1/gene-HDAC9/gene-SHC3
GO:0032507	maintenance of protein location in cell	3/257	77/10946	1.66	0.270652	0.733219	gene-LOC121106525/gene-LOC121108310/gene-SGCZ
GO:2000045	regulation of G1/S transition of mitotic cell cycle	3/257	77/10946	1.66	0.270652	0.733219	gene-ANKHD1/gene-EGFR/gene-PLA2G4A
GO:2000181	negative regulation of blood vessel morphogenesis	3/257	77/10946	1.66	0.270652	0.733219	gene-DLC1/gene-HDAC9/gene-SHC3
GO:1901699	cellular response to nitrogen compound	10/257	338/10946	1.26	0.271738	0.733219	gene-AKAP6/gene-BRCA1/gene-DLC1/gene-FER/gene-GRB2/gene-HDAC9/gene-IFIH1/gene-MAP1A/gene-PCNT/gene-SHC3
GO:0032970	regulation of actin filament-based process	7/257	224/10946	1.33	0.274035	0.733219	gene-AKAP6/gene-DLC1/gene-FER/gene-GRB2/gene-NTF3/gene-PCNT/gene-SSH3
GO:0031023	microtubule organizing center organization	4/257	113/10946	1.51	0.274251	0.733219	gene-BRCA1/gene-FER/gene-LOC121108310/gene-PCNT
GO:0044770	cell cycle phase transition	4/257	113/10946	1.51	0.274251	0.733219	gene-CCNO/gene-DLC1/gene-EGFR/gene-PCNT
GO:0048814	regulation of dendrite morphogenesis	4/257	113/10946	1.51	0.274251	0.733219	gene-DLC1/gene-FAM151B/gene-FAM151BL/gene-LOC121110409
GO:0009611	response to wounding	10/257	339/10946	1.26	0.274694	0.733219	gene-CD9/gene-CHST4/gene-FAM65C/gene-MAP1A/gene-MEGF10/gene-NRG2/gene-PLA2G4A/gene-SNAI1/gene-VWF/gene-WWTR1
GO:0000132	establishment of mitotic spindle orientation	2/257	44/10946	1.94	0.276541	0.733219	gene-DLC1/gene-LLGL2
GO:0001938	positive regulation of endothelial cell proliferation	2/257	44/10946	1.94	0.276541	0.733219	gene-MYDGF/gene-PGF
GO:0002011	morphogenesis of an epithelial sheet	2/257	44/10946	1.94	0.276541	0.733219	gene-SNAI1/gene-WWTR1
GO:0007492	endoderm development	2/257	44/10946	1.94	0.276541	0.733219	gene-ANKHD1/gene-WWTR1
GO:0014031	mesenchymal cell development	2/257	44/10946	1.94	0.276541	0.733219	gene-NRG2/gene-SNAI1
GO:0030866	cortical actin cytoskeleton organization	2/257	44/10946	1.94	0.276541	0.733219	gene-DLC1/gene-LLGL2
GO:0033865	nucleoside bisphosphate metabolic process	2/257	44/10946	1.94	0.276541	0.733219	gene-BAAT/gene-SLC25A1
GO:0033875	ribonucleoside bisphosphate metabolic process	2/257	44/10946	1.94	0.276541	0.733219	gene-BAAT/gene-SLC25A1
GO:0034032	purine nucleoside bisphosphate metabolic process	2/257	44/10946	1.94	0.276541	0.733219	gene-BAAT/gene-SLC25A1
GO:0048284	organelle fusion	2/257	44/10946	1.94	0.276541	0.733219	gene-BECN1/gene-SNAP29
GO:0051491	positive regulation of filopodium assembly	2/257	44/10946	1.94	0.276541	0.733219	gene-FAM65C/gene-TENM3
GO:0072595	maintenance of protein localization in organelle	2/257	44/10946	1.94	0.276541	0.733219	gene-LOC121106525/gene-LOC121108310
GO:0042542	response to hydrogen peroxide	3/257	78/10946	1.64	0.277045	0.733219	gene-BECN1/gene-PLA2G4A/gene-SHC3
GO:0043254	regulation of protein-containing complex assembly	7/257	225/10946	1.33	0.277695	0.733219	gene-FER/gene-GRB2/gene-MAP1A/gene-PATL1/gene-PCNT/gene-RRN3/gene-SSH3
GO:0030334	regulation of cell migration	14/257	497/10946	1.2	0.27913	0.733219	gene-CERS4/gene-DLC1/gene-FAM65C/gene-FER/gene-FLRT2/gene-HDAC9/gene-HMCN1/gene-LLGL2/gene-LOC121106525/gene-MCC/gene-NTF3/gene-PGF/gene-SNAI1/gene-ZNF821
GO:0032412	regulation of ion transmembrane transporter activity	4/257	114/10946	1.49	0.279487	0.733219	gene-AKAP6/gene-NRXN3/gene-PCNT/gene-WNK4
GO:0035303	regulation of dephosphorylation	4/257	114/10946	1.49	0.279487	0.733219	gene-AKAP6/gene-DLC1/gene-TMEM132A/gene-WNK4
GO:0040014	regulation of multicellular organism growth	4/257	114/10946	1.49	0.279487	0.733219	gene-BECN1/gene-DIO2/gene-GPC2/gene-MRGPRH
GO:0050730	regulation of peptidyl-tyrosine phosphorylation	4/257	114/10946	1.49	0.279487	0.733219	gene-NRG2/gene-NTF3/gene-PGF/gene-SHC3
GO:0071363	cellular response to growth factor stimulus	9/257	302/10946	1.27	0.2796	0.733219	gene-BECN1/gene-FLRT2/gene-GRB2/gene-LLGL2/gene-MAP1A/gene-NTF3/gene-SHC3/gene-SNAI1/gene-ZFYVE16
GO:0051129	negative regulation of cellular component organization	13/257	458/10946	1.21	0.280078	0.733219	gene-ANKHD1/gene-BECN1/gene-BRCA1/gene-CERS4/gene-DLC1/gene-FEZ1/gene-KDM4B/gene-MAP1A/gene-NRXN3/gene-PATL1/gene-SLF1/gene-SSH3/gene-TERF2IP
GO:0071375	cellular response to peptide hormone stimulus	6/257	188/10946	1.36	0.280357	0.733219	gene-DLC1/gene-FER/gene-GRB2/gene-HDAC9/gene-MAP1A/gene-SHC3
GO:0050803	regulation of synapse structure or activity	8/257	264/10946	1.29	0.280939	0.733219	gene-ADGRL2/gene-FEZ1/gene-FLRT2/gene-LOC121110409/gene-MAP1A/gene-NRXN3/gene-PATL1/gene-TENM3
GO:0010001	glial cell differentiation	5/257	151/10946	1.41	0.281453	0.733219	gene-CD9/gene-CNTNAP1/gene-CNTNAP2/gene-NTF3/gene-TENM3
GO:0000288	nuclear-transcribed mRNA catabolic process, deadenylation-dependent decay	1/257	14/10946	3.04	0.283104	0.733219	gene-PATL1
GO:0000460	maturation of 5.8S rRNA	1/257	14/10946	3.04	0.283104	0.733219	gene-SKIV2L2
GO:0002089	lens morphogenesis in camera-type eye	1/257	14/10946	3.04	0.283104	0.733219	gene-PROX2
GO:0002691	regulation of cellular extravasation	1/257	14/10946	3.04	0.283104	0.733219	gene-FAM65C
GO:0007362	terminal region determination	1/257	14/10946	3.04	0.283104	0.733219	gene-ZNF821
GO:0007400	neuroblast fate determination	1/257	14/10946	3.04	0.283104	0.733219	gene-TCF4
GO:0008594	photoreceptor cell morphogenesis	1/257	14/10946	3.04	0.283104	0.733219	gene-ZNF821
GO:0010288	response to lead ion	1/257	14/10946	3.04	0.283104	0.733219	gene-BECN1
GO:0010544	negative regulation of platelet activation	1/257	14/10946	3.04	0.283104	0.733219	gene-CD9
GO:0010592	positive regulation of lamellipodium assembly	1/257	14/10946	3.04	0.283104	0.733219	gene-HDAC9
GO:0010667	negative regulation of cardiac muscle cell apoptotic process	1/257	14/10946	3.04	0.283104	0.733219	gene-NRG2
GO:0010831	positive regulation of myotube differentiation	1/257	14/10946	3.04	0.283104	0.733219	gene-FAM65C
GO:0010839	negative regulation of keratinocyte proliferation	1/257	14/10946	3.04	0.283104	0.733219	gene-SNAI1
GO:0010889	regulation of sequestering of triglyceride	1/257	14/10946	3.04	0.283104	0.733219	gene-PLIN3
GO:0010894	negative regulation of steroid biosynthetic process	1/257	14/10946	3.04	0.283104	0.733219	gene-SNAI1
GO:0010896	regulation of triglyceride catabolic process	1/257	14/10946	3.04	0.283104	0.733219	gene-PLIN3
GO:0010922	positive regulation of phosphatase activity	1/257	14/10946	3.04	0.283104	0.733219	gene-AKAP6
GO:0021815	modulation of microtubule cytoskeleton involved in cerebral cortex radial glia guided migration	1/257	14/10946	3.04	0.283104	0.733219	gene-LOC121106525
GO:0031050	dsRNA processing	1/257	14/10946	3.04	0.283104	0.733219	gene-IFIH1
GO:0032611	interleukin-1 beta production	1/257	14/10946	3.04	0.283104	0.733219	gene-TNFAIP8L1
GO:0032612	interleukin-1 production	1/257	14/10946	3.04	0.283104	0.733219	gene-TNFAIP8L1
GO:0032958	inositol phosphate biosynthetic process	1/257	14/10946	3.04	0.283104	0.733219	gene-PPIP5K1
GO:0033006	regulation of mast cell activation involved in immune response	1/257	14/10946	3.04	0.283104	0.733219	gene-FER
GO:0033233	regulation of protein sumoylation	1/257	14/10946	3.04	0.283104	0.733219	gene-HDAC9
GO:0034109	homotypic cell-cell adhesion	1/257	14/10946	3.04	0.283104	0.733219	gene-MEGF10
GO:0036120	cellular response to platelet-derived growth factor stimulus	1/257	14/10946	3.04	0.283104	0.733219	gene-SNAI1
GO:0038202	TORC1 signaling	1/257	14/10946	3.04	0.283104	0.733219	gene-SHC3
GO:0043496	regulation of protein homodimerization activity	1/257	14/10946	3.04	0.283104	0.733219	gene-NRG2
GO:0043586	tongue development	1/257	14/10946	3.04	0.283104	0.733219	gene-NTF3
GO:0045167	asymmetric protein localization involved in cell fate determination	1/257	14/10946	3.04	0.283104	0.733219	gene-LLGL2
GO:0045663	positive regulation of myoblast differentiation	1/257	14/10946	3.04	0.283104	0.733219	gene-FAM65C
GO:0045723	positive regulation of fatty acid biosynthetic process	1/257	14/10946	3.04	0.283104	0.733219	gene-PLA2G4A
GO:0046037	GMP metabolic process	1/257	14/10946	3.04	0.283104	0.733219	gene-MPP2
GO:0046469	platelet activating factor metabolic process	1/257	14/10946	3.04	0.283104	0.733219	gene-PLA2G4A
GO:0046710	GDP metabolic process	1/257	14/10946	3.04	0.283104	0.733219	gene-MPP2
GO:0047497	mitochondrion transport along microtubule	1/257	14/10946	3.04	0.283104	0.733219	gene-MAP1A
GO:0048069	eye pigmentation	1/257	14/10946	3.04	0.283104	0.733219	gene-MAN2A1
GO:0050975	sensory perception of touch	1/257	14/10946	3.04	0.283104	0.733219	gene-APBA1
GO:0051895	negative regulation of focal adhesion assembly	1/257	14/10946	3.04	0.283104	0.733219	gene-DLC1
GO:0060038	cardiac muscle cell proliferation	1/257	14/10946	3.04	0.283104	0.733219	gene-TENM3
GO:0061436	establishment of skin barrier	1/257	14/10946	3.04	0.283104	0.733219	gene-GRHL3
GO:0070102	interleukin-6-mediated signaling pathway	1/257	14/10946	3.04	0.283104	0.733219	gene-FER
GO:0070918	production of small RNA involved in gene silencing by RNA	1/257	14/10946	3.04	0.283104	0.733219	gene-IFIH1
GO:0071480	cellular response to gamma radiation	1/257	14/10946	3.04	0.283104	0.733219	gene-WWTR1
GO:0097114	NMDA glutamate receptor clustering	1/257	14/10946	3.04	0.283104	0.733219	gene-NRXN3
GO:0098780	response to mitochondrial depolarisation	1/257	14/10946	3.04	0.283104	0.733219	gene-BECN1
GO:1902305	regulation of sodium ion transmembrane transport	1/257	14/10946	3.04	0.283104	0.733219	gene-WNK4
GO:1903392	negative regulation of adherens junction organization	1/257	14/10946	3.04	0.283104	0.733219	gene-DLC1
GO:1990709	presynaptic active zone organization	1/257	14/10946	3.04	0.283104	0.733219	gene-TENM3
GO:2000142	regulation of DNA-templated transcription, initiation	1/257	14/10946	3.04	0.283104	0.733219	gene-RRN3
GO:2000291	regulation of myoblast proliferation	1/257	14/10946	3.04	0.283104	0.733219	gene-GCFC2
GO:2000727	positive regulation of cardiac muscle cell differentiation	1/257	14/10946	3.04	0.283104	0.733219	gene-AKAP6
GO:0044344	cellular response to fibroblast growth factor stimulus	3/257	79/10946	1.62	0.283454	0.733219	gene-FLRT2/gene-GRB2/gene-SNAI1
GO:0045667	regulation of osteoblast differentiation	3/257	79/10946	1.62	0.283454	0.733219	gene-HDAC9/gene-NBR1/gene-SNAI1
GO:0071774	response to fibroblast growth factor	3/257	79/10946	1.62	0.283454	0.733219	gene-FLRT2/gene-GRB2/gene-SNAI1
GO:0042692	muscle cell differentiation	8/257	265/10946	1.29	0.28434	0.733219	gene-ANKHD1/gene-EGFR/gene-FAM65C/gene-MEGF10/gene-NRG2/gene-NTF3/gene-PROX2/gene-SGCZ
GO:0002164	larval development	6/257	189/10946	1.35	0.284403	0.733219	gene-APBB3/gene-BECN1/gene-KDM2A/gene-LLGL2/gene-LOC121106525/gene-TCF4
GO:0001738	morphogenesis of a polarized epithelium	4/257	115/10946	1.48	0.284739	0.733219	gene-EGFR/gene-GRHL3/gene-LLGL2/gene-ZNF821
GO:0006487	protein N-linked glycosylation	2/257	45/10946	1.89	0.285291	0.733219	gene-DPAGT1/gene-TMEM258
GO:0046717	acid secretion	2/257	45/10946	1.89	0.285291	0.733219	gene-APBA1/gene-PLA2G4A
GO:0048015	phosphatidylinositol-mediated signaling	2/257	45/10946	1.89	0.285291	0.733219	gene-MEGF10/gene-PI4KA
GO:2001022	positive regulation of response to DNA damage stimulus	2/257	45/10946	1.89	0.285291	0.733219	gene-APBB3/gene-BRCA1
GO:0001558	regulation of cell growth	9/257	304/10946	1.26	0.285948	0.733219	gene-AKAP6/gene-APBB3/gene-FAM151B/gene-FAM151BL/gene-FEZ1/gene-KDM2A/gene-MAP1A/gene-NRG2/gene-SLC44A5
GO:2000146	negative regulation of cell motility	6/257	190/10946	1.34	0.288462	0.733219	gene-CERS4/gene-DLC1/gene-FAM65C/gene-HDAC9/gene-LLGL2/gene-MCC
GO:0000187	activation of MAPK activity	3/257	80/10946	1.6	0.289876	0.733219	gene-NRG2/gene-NTF3/gene-SHC3
GO:0002768	immune response-regulating cell surface receptor signaling pathway	3/257	80/10946	1.6	0.289876	0.733219	gene-FER/gene-GRB2/gene-SHC3
GO:0051668	localization within membrane	3/257	80/10946	1.6	0.289876	0.733219	gene-APBA1/gene-LLGL2/gene-NRXN3
GO:0061333	renal tubule morphogenesis	3/257	80/10946	1.6	0.289876	0.733219	gene-DLC1/gene-EGFR/gene-HDAC9
GO:0044772	mitotic cell cycle phase transition	4/257	116/10946	1.47	0.290005	0.733219	gene-CCNO/gene-DLC1/gene-EGFR/gene-PCNT
GO:0001570	vasculogenesis	2/257	46/10946	1.85	0.294031	0.733219	gene-HDAC9/gene-WWTR1
GO:0010324	membrane invagination	2/257	46/10946	1.85	0.294031	0.733219	gene-BECN1/gene-MEGF10
GO:0033047	regulation of mitotic sister chromatid segregation	2/257	46/10946	1.85	0.294031	0.733219	gene-BECN1/gene-DLC1
GO:0048709	oligodendrocyte differentiation	2/257	46/10946	1.85	0.294031	0.733219	gene-CD9/gene-TENM3
GO:0071156	regulation of cell cycle arrest	2/257	46/10946	1.85	0.294031	0.733219	gene-BRCA1/gene-FAM65C
GO:0099024	plasma membrane invagination	2/257	46/10946	1.85	0.294031	0.733219	gene-BECN1/gene-MEGF10
GO:1904377	positive regulation of protein localization to cell periphery	2/257	46/10946	1.85	0.294031	0.733219	gene-NRXN3/gene-WNK4
GO:0009894	regulation of catabolic process	12/257	424/10946	1.21	0.294255	0.733219	gene-ANKHD1/gene-BECN1/gene-CERS4/gene-FEZ1/gene-GABARAPL2/gene-GGA3/gene-HDAC9/gene-KDM4B/gene-MAP1A/gene-PLIN3/gene-RNF114/gene-TNFAIP8L1
GO:0042326	negative regulation of phosphorylation	8/257	268/10946	1.27	0.294606	0.733219	gene-FLRT2/gene-HDAC9/gene-LLGL2/gene-NTF3/gene-PHLPP2/gene-TERF2IP/gene-WNK4/gene-ZNF821
GO:0022898	regulation of transmembrane transporter activity	4/257	117/10946	1.46	0.295285	0.733219	gene-AKAP6/gene-NRXN3/gene-PCNT/gene-WNK4
GO:1903320	regulation of protein modification by small protein conjugation or removal	4/257	117/10946	1.46	0.295285	0.733219	gene-BRCA1/gene-HDAC9/gene-KDM2A/gene-LOC121108310
GO:0018958	phenol-containing compound metabolic process	3/257	81/10946	1.58	0.296308	0.733219	gene-ARHGEF5/gene-DIO2/gene-SHC3
GO:0051965	positive regulation of synapse assembly	3/257	81/10946	1.58	0.296308	0.733219	gene-ADGRL2/gene-FLRT2/gene-NRXN3
GO:0120034	positive regulation of plasma membrane bounded cell projection assembly	3/257	81/10946	1.58	0.296308	0.733219	gene-FAM65C/gene-HDAC9/gene-TENM3
GO:1902806	regulation of cell cycle G1/S phase transition	3/257	81/10946	1.58	0.296308	0.733219	gene-ANKHD1/gene-EGFR/gene-PLA2G4A
GO:0001946	lymphangiogenesis	1/257	15/10946	2.84	0.299958	0.733219	gene-PROX2
GO:0002753	cytoplasmic pattern recognition receptor signaling pathway	1/257	15/10946	2.84	0.299958	0.733219	gene-IFIH1
GO:0007080	mitotic metaphase plate congression	1/257	15/10946	2.84	0.299958	0.733219	gene-BECN1
GO:0007549	dosage compensation	1/257	15/10946	2.84	0.299958	0.733219	gene-BRCA1
GO:0009235	cobalamin metabolic process	1/257	15/10946	2.84	0.299958	0.733219	gene-GIF
GO:0009826	unidimensional cell growth	1/257	15/10946	2.84	0.299958	0.733219	gene-FER
GO:0014719	skeletal muscle satellite cell activation	1/257	15/10946	2.84	0.299958	0.733219	gene-MEGF10
GO:0014812	muscle cell migration	1/257	15/10946	2.84	0.299958	0.733219	gene-MEGF10
GO:0016233	telomere capping	1/257	15/10946	2.84	0.299958	0.733219	gene-TERF2IP
GO:0018146	keratan sulfate biosynthetic process	1/257	15/10946	2.84	0.299958	0.733219	gene-CHST6
GO:0018298	protein-chromophore linkage	1/257	15/10946	2.84	0.299958	0.733219	gene-OPNVA
GO:0021814	cell motility involved in cerebral cortex radial glia guided migration	1/257	15/10946	2.84	0.299958	0.733219	gene-LOC121106525
GO:0031581	hemidesmosome assembly	1/257	15/10946	2.84	0.299958	0.733219	gene-LLGL2
GO:0032480	negative regulation of type I interferon production	1/257	15/10946	2.84	0.299958	0.733219	gene-IFIH1
GO:0033363	secretory granule organization	1/257	15/10946	2.84	0.299958	0.733219	gene-RUNDC1
GO:0033561	regulation of water loss via skin	1/257	15/10946	2.84	0.299958	0.733219	gene-GRHL3
GO:0034629	cellular protein-containing complex localization	1/257	15/10946	2.84	0.299958	0.733219	gene-AKAP6
GO:0035641	locomotory exploration behavior	1/257	15/10946	2.84	0.299958	0.733219	gene-SLC4A9
GO:0042255	ribosome assembly	1/257	15/10946	2.84	0.299958	0.733219	gene-MRPS7
GO:0042403	thyroid hormone metabolic process	1/257	15/10946	2.84	0.299958	0.733219	gene-DIO2
GO:0045738	negative regulation of DNA repair	1/257	15/10946	2.84	0.299958	0.733219	gene-TP53BP1
GO:0046599	regulation of centriole replication	1/257	15/10946	2.84	0.299958	0.733219	gene-BRCA1
GO:0051281	positive regulation of release of sequestered calcium ion into cytosol	1/257	15/10946	2.84	0.299958	0.733219	gene-AKAP6
GO:0060314	regulation of ryanodine-sensitive calcium-release channel activity	1/257	15/10946	2.84	0.299958	0.733219	gene-AKAP6
GO:0061101	neuroendocrine cell differentiation	1/257	15/10946	2.84	0.299958	0.733219	gene-TCF4
GO:0061912	selective autophagy	1/257	15/10946	2.84	0.299958	0.733219	gene-BECN1
GO:0070831	basement membrane assembly	1/257	15/10946	2.84	0.299958	0.733219	gene-TENM3
GO:0072488	ammonium transmembrane transport	1/257	15/10946	2.84	0.299958	0.733219	gene-SLC44A5
GO:0090036	regulation of protein kinase C signaling	1/257	15/10946	2.84	0.299958	0.733219	gene-PHLPP2
GO:0090224	regulation of spindle organization	1/257	15/10946	2.84	0.299958	0.733219	gene-FAM65C
GO:1904467	regulation of tumor necrosis factor secretion	1/257	15/10946	2.84	0.299958	0.733219	gene-IFIH1
GO:2000780	negative regulation of double-strand break repair	1/257	15/10946	2.84	0.299958	0.733219	gene-TP53BP1
GO:2001013	epithelial cell proliferation involved in renal tubule morphogenesis	1/257	15/10946	2.84	0.299958	0.733219	gene-EGFR
GO:0015849	organic acid transport	4/257	118/10946	1.44	0.300578	0.733219	gene-APBA1/gene-PLA2G4A/gene-PLIN3/gene-SLC25A1
GO:0046942	carboxylic acid transport	4/257	118/10946	1.44	0.300578	0.733219	gene-APBA1/gene-PLA2G4A/gene-PLIN3/gene-SLC25A1
GO:0022407	regulation of cell-cell adhesion	6/257	193/10946	1.32	0.300713	0.733219	gene-CD9/gene-FAM65C/gene-GRB2/gene-SNAI1/gene-TENM3/gene-ZNF821
GO:0009607	response to biotic stimulus	11/257	387/10946	1.21	0.300916	0.733219	gene-ADGRL2/gene-ANKHD1/gene-BECN1/gene-CORO1B/gene-FER/gene-HMCN1/gene-IFIH1/gene-PLA2G4A/gene-SHC3/gene-TNFAIP8L1/gene-VWF
GO:0051272	positive regulation of cellular component movement	9/257	309/10946	1.24	0.301987	0.733219	gene-CHST4/gene-FAM65C/gene-FER/gene-HDAC9/gene-HMCN1/gene-NTF3/gene-PGF/gene-SNAI1/gene-ZNF821
GO:0002699	positive regulation of immune effector process	3/257	82/10946	1.56	0.302749	0.733219	gene-ANKHD1/gene-FER/gene-TP53BP1
GO:0030833	regulation of actin filament polymerization	3/257	82/10946	1.56	0.302749	0.733219	gene-FER/gene-GRB2/gene-SSH3
GO:0038083	peptidyl-tyrosine autophosphorylation	2/257	47/10946	1.81	0.302756	0.733219	gene-FER/gene-GRB2
GO:0060191	regulation of lipase activity	2/257	47/10946	1.81	0.302756	0.733219	gene-DLC1/gene-NTF3
GO:0051963	regulation of synapse assembly	5/257	156/10946	1.37	0.304298	0.733219	gene-ADGRL2/gene-FLRT2/gene-MAP1A/gene-NRXN3/gene-PATL1
GO:0043087	regulation of GTPase activity	8/257	271/10946	1.26	0.304961	0.733219	gene-DLC1/gene-FGD5/gene-IFIH1/gene-IQGAP3/gene-LLGL2/gene-LOC121110409/gene-NTF3/gene-RUNDC1
GO:0008219	cell death	12/257	428/10946	1.19	0.305223	0.733219	gene-BECN1/gene-BRCA1/gene-DIO2/gene-DLC1/gene-HDAC9/gene-LLGL2/gene-LOC121108310/gene-MEGF10/gene-PGA5/gene-SHC3/gene-SLC4A9/gene-TNFAIP8L1
GO:0060537	muscle tissue development	6/257	195/10946	1.31	0.308935	0.733219	gene-FAM65C/gene-MEGF10/gene-NRG2/gene-PROX2/gene-SGCZ/gene-TENM3
GO:0022408	negative regulation of cell-cell adhesion	3/257	83/10946	1.54	0.309196	0.733219	gene-CD9/gene-FAM65C/gene-SNAI1
GO:0003208	cardiac ventricle morphogenesis	2/257	48/10946	1.77	0.311462	0.733219	gene-GRHL3/gene-NRG2
GO:0048641	regulation of skeletal muscle tissue development	2/257	48/10946	1.77	0.311462	0.733219	gene-HDAC9/gene-MEGF10
GO:0051092	positive regulation of NF-kappaB transcription factor activity	2/257	48/10946	1.77	0.311462	0.733219	gene-FER/gene-TERF2IP
GO:1903363	negative regulation of cellular protein catabolic process	2/257	48/10946	1.77	0.311462	0.733219	gene-GABARAPL2/gene-MAP1A
GO:0006259	DNA metabolic process	8/257	273/10946	1.25	0.311909	0.733219	gene-APBB3/gene-BRCA1/gene-CNTD1/gene-KDM2A/gene-LOC121106525/gene-LOC424727/gene-TERF2IP/gene-TP53BP1
GO:0030534	adult behavior	5/257	158/10946	1.35	0.313517	0.733219	gene-EGFR/gene-NRXN3/gene-NTAN1/gene-NTF3/gene-TRMT1L
GO:0032868	response to insulin	5/257	158/10946	1.35	0.313517	0.733219	gene-DLC1/gene-FER/gene-GRB2/gene-HDAC9/gene-SHC3
GO:0050808	synapse organization	7/257	235/10946	1.27	0.314923	0.733219	gene-ADGRL2/gene-CNTNAP1/gene-CNTNAP2/gene-MAP1A/gene-NRXN3/gene-SEMA4D/gene-TENM3
GO:0120031	plasma membrane bounded cell projection assembly	7/257	235/10946	1.27	0.314923	0.733219	gene-FGD5/gene-LLGL2/gene-PCNT/gene-TCTN3/gene-TMEM216/gene-TMEM231/gene-WWTR1
GO:0035050	embryonic heart tube development	3/257	84/10946	1.52	0.315649	0.733219	gene-KDM2A/gene-PCNT/gene-WWTR1
GO:0051592	response to calcium ion	3/257	84/10946	1.52	0.315649	0.733219	gene-NRXN3/gene-PLA2G4A/gene-WNK4
GO:0061982	meiosis I cell cycle process	3/257	84/10946	1.52	0.315649	0.733219	gene-CCNO/gene-CNTD1/gene-LOC121106525
GO:1901343	negative regulation of vasculature development	3/257	84/10946	1.52	0.315649	0.733219	gene-DLC1/gene-HDAC9/gene-SHC3
GO:0001825	blastocyst formation	1/257	16/10946	2.66	0.316417	0.733219	gene-KDM4B
GO:0002093	auditory receptor cell morphogenesis	1/257	16/10946	2.66	0.316417	0.733219	gene-FAM65C
GO:0006301	postreplication repair	1/257	16/10946	2.66	0.316417	0.733219	gene-BRCA1
GO:0006476	protein deacetylation	1/257	16/10946	2.66	0.316417	0.733219	gene-HDAC9
GO:0006491	N-glycan processing	1/257	16/10946	2.66	0.316417	0.733219	gene-MAN2A1
GO:0006642	triglyceride mobilization	1/257	16/10946	2.66	0.316417	0.733219	gene-PLIN3
GO:0006699	bile acid biosynthetic process	1/257	16/10946	2.66	0.316417	0.733219	gene-BAAT
GO:0007620	copulation	1/257	16/10946	2.66	0.316417	0.733219	gene-UBAP2
GO:0010664	negative regulation of striated muscle cell apoptotic process	1/257	16/10946	2.66	0.316417	0.733219	gene-NRG2
GO:0010882	regulation of cardiac muscle contraction by calcium ion signaling	1/257	16/10946	2.66	0.316417	0.733219	gene-HDAC9
GO:0016246	RNA interference	1/257	16/10946	2.66	0.316417	0.733219	gene-IFIH1
GO:0016476	regulation of embryonic cell shape	1/257	16/10946	2.66	0.316417	0.733219	gene-FER
GO:0016572	histone phosphorylation	1/257	16/10946	2.66	0.316417	0.733219	gene-CCNO
GO:0031294	lymphocyte costimulation	1/257	16/10946	2.66	0.316417	0.733219	gene-GRB2
GO:0031295	T cell costimulation	1/257	16/10946	2.66	0.316417	0.733219	gene-GRB2
GO:0031622	positive regulation of fever generation	1/257	16/10946	2.66	0.316417	0.733219	gene-PLA2G4A
GO:0031652	positive regulation of heat generation	1/257	16/10946	2.66	0.316417	0.733219	gene-PLA2G4A
GO:0032205	negative regulation of telomere maintenance	1/257	16/10946	2.66	0.316417	0.733219	gene-TERF2IP
GO:0035262	gonad morphogenesis	1/257	16/10946	2.66	0.316417	0.733219	gene-TCF4
GO:0035309	wing and notum subfield formation	1/257	16/10946	2.66	0.316417	0.733219	gene-EGFR
GO:0035461	vitamin transmembrane transport	1/257	16/10946	2.66	0.316417	0.733219	gene-SLC44A5
GO:0042339	keratan sulfate metabolic process	1/257	16/10946	2.66	0.316417	0.733219	gene-CHST6
GO:0042675	compound eye cone cell differentiation	1/257	16/10946	2.66	0.316417	0.733219	gene-EGFR
GO:0045117	azole transmembrane transport	1/257	16/10946	2.66	0.316417	0.733219	gene-SLC44A5
GO:0045175	basal protein localization	1/257	16/10946	2.66	0.316417	0.733219	gene-LLGL2
GO:0046668	regulation of retinal cell programmed cell death	1/257	16/10946	2.66	0.316417	0.733219	gene-EGFR
GO:0050910	detection of mechanical stimulus involved in sensory perception of sound	1/257	16/10946	2.66	0.316417	0.733219	gene-TMEM132A
GO:0051154	negative regulation of striated muscle cell differentiation	1/257	16/10946	2.66	0.316417	0.733219	gene-HDAC9
GO:0051972	regulation of telomerase activity	1/257	16/10946	2.66	0.316417	0.733219	gene-GRHL3
GO:0051984	positive regulation of chromosome segregation	1/257	16/10946	2.66	0.316417	0.733219	gene-BECN1
GO:0055017	cardiac muscle tissue growth	1/257	16/10946	2.66	0.316417	0.733219	gene-TENM3
GO:0060009	Sertoli cell development	1/257	16/10946	2.66	0.316417	0.733219	gene-PCNT
GO:0060088	auditory receptor cell stereocilium organization	1/257	16/10946	2.66	0.316417	0.733219	gene-FAM65C
GO:0071622	regulation of granulocyte chemotaxis	1/257	16/10946	2.66	0.316417	0.733219	gene-FAM65C
GO:0090022	regulation of neutrophil chemotaxis	1/257	16/10946	2.66	0.316417	0.733219	gene-FAM65C
GO:0090325	regulation of locomotion involved in locomotory behavior	1/257	16/10946	2.66	0.316417	0.733219	gene-RUNDC1
GO:0090330	regulation of platelet aggregation	1/257	16/10946	2.66	0.316417	0.733219	gene-CD9
GO:0099068	postsynapse assembly	1/257	16/10946	2.66	0.316417	0.733219	gene-NRXN3
GO:0099558	maintenance of synapse structure	1/257	16/10946	2.66	0.316417	0.733219	gene-TENM3
GO:1901889	negative regulation of cell junction assembly	1/257	16/10946	2.66	0.316417	0.733219	gene-DLC1
GO:1902624	positive regulation of neutrophil migration	1/257	16/10946	2.66	0.316417	0.733219	gene-FAM65C
GO:1904475	regulation of Ras GTPase binding	1/257	16/10946	2.66	0.316417	0.733219	gene-FAM65C
GO:2000059	negative regulation of ubiquitin-dependent protein catabolic process	1/257	16/10946	2.66	0.316417	0.733219	gene-MAP1A
GO:2000737	negative regulation of stem cell differentiation	1/257	16/10946	2.66	0.316417	0.733219	gene-WWTR1
GO:0000302	response to reactive oxygen species	4/257	121/10946	1.41	0.316518	0.733219	gene-BECN1/gene-FER/gene-PLA2G4A/gene-SHC3
GO:0001745	compound eye morphogenesis	6/257	197/10946	1.3	0.317195	0.733219	gene-ANKHD1/gene-EGFR/gene-GRHL3/gene-KDM4B/gene-TENM3/gene-ZNF821
GO:0060341	regulation of cellular localization	13/257	473/10946	1.17	0.319414	0.733219	gene-AKAP6/gene-ARHGEF5/gene-BECN1/gene-BRCA1/gene-CPSF7/gene-FAM65C/gene-FER/gene-MAP1A/gene-NRXN3/gene-PCNT/gene-RUNDC1/gene-WNK4/gene-ZNF821
GO:0055114	oxidation-reduction process	10/257	354/10946	1.2	0.320103	0.733219	gene-ALOX15B/gene-AOC3/gene-BECN1/gene-C5orf63/gene-CYB561A3/gene-DIO2/gene-G6PC/gene-KDM2A/gene-KDM4B/gene-SELENOT
GO:0014033	neural crest cell differentiation	2/257	49/10946	1.74	0.320145	0.733219	gene-NRG2/gene-SNAI1
GO:0014068	positive regulation of phosphatidylinositol 3-kinase signaling	2/257	49/10946	1.74	0.320145	0.733219	gene-BECN1/gene-MYDGF
GO:0019748	secondary metabolic process	2/257	49/10946	1.74	0.320145	0.733219	gene-ARHGEF5/gene-SHC3
GO:0070373	negative regulation of ERK1 and ERK2 cascade	2/257	49/10946	1.74	0.320145	0.733219	gene-PHLPP2/gene-WNK4
GO:0035148	tube formation	4/257	122/10946	1.4	0.321848	0.733219	gene-DLC1/gene-GRHL3/gene-KDM2A/gene-TCTN3
GO:0030177	positive regulation of Wnt signaling pathway	3/257	85/10946	1.5	0.322104	0.733219	gene-GPC2/gene-WNK4/gene-WWTR1
GO:0048663	neuron fate commitment	3/257	85/10946	1.5	0.322104	0.733219	gene-EGFR/gene-GRHL3/gene-TCF4
GO:0010506	regulation of autophagy	5/257	160/10946	1.33	0.322772	0.733219	gene-ANKHD1/gene-BECN1/gene-FEZ1/gene-KDM4B/gene-TNFAIP8L1
GO:0021537	telencephalon development	5/257	160/10946	1.33	0.322772	0.733219	gene-KDM2A/gene-LOC121106525/gene-PCNT/gene-PHLPP2/gene-TCTN3
GO:0071214	cellular response to abiotic stimulus	5/257	160/10946	1.33	0.322772	0.733219	gene-FAM65C/gene-GRB2/gene-HDAC9/gene-SNAI1/gene-WWTR1
GO:0104004	cellular response to environmental stimulus	5/257	160/10946	1.33	0.322772	0.733219	gene-FAM65C/gene-GRB2/gene-HDAC9/gene-SNAI1/gene-WWTR1
GO:0032101	regulation of response to external stimulus	12/257	435/10946	1.17	0.324672	0.733219	gene-ANKHD1/gene-BECN1/gene-CD9/gene-CERS4/gene-FAM65C/gene-NRG2/gene-NTF3/gene-PGF/gene-PLA2G4A/gene-SEMA4D/gene-SHC3/gene-SNAI1
GO:0034622	cellular protein-containing complex assembly	9/257	316/10946	1.21	0.324792	0.733219	gene-CPSF7/gene-IFIH1/gene-LLGL2/gene-MRPS7/gene-NRG2/gene-PATL1/gene-PCNT/gene-RRN3/gene-SNAP29
GO:0012501	programmed cell death	11/257	396/10946	1.18	0.327126	0.733219	gene-BECN1/gene-BRCA1/gene-DIO2/gene-DLC1/gene-HDAC9/gene-LLGL2/gene-LOC121108310/gene-MEGF10/gene-SHC3/gene-SLC4A9/gene-TNFAIP8L1
GO:0002764	immune response-regulating signaling pathway	4/257	123/10946	1.39	0.327185	0.733219	gene-FER/gene-GRB2/gene-IFIH1/gene-SHC3
GO:0051048	negative regulation of secretion	4/257	123/10946	1.39	0.327185	0.733219	gene-MRGPRH/gene-NRG2/gene-SNAP29/gene-WNK4
GO:0090257	regulation of muscle system process	5/257	161/10946	1.32	0.327412	0.733219	gene-AKAP6/gene-BECN1/gene-HDAC9/gene-PCNT/gene-SHC3
GO:0042058	regulation of epidermal growth factor receptor signaling pathway	3/257	86/10946	1.49	0.32856	0.733219	gene-FER/gene-GRB2/gene-SHC3
GO:0043524	negative regulation of neuron apoptotic process	3/257	86/10946	1.49	0.32856	0.733219	gene-KDM2A/gene-MAP1A/gene-NTF3
GO:0000725	recombinational repair	2/257	50/10946	1.7	0.328802	0.733219	gene-BRCA1/gene-LOC121106525
GO:0030279	negative regulation of ossification	2/257	50/10946	1.7	0.328802	0.733219	gene-HDAC9/gene-NBR1
GO:0030518	intracellular steroid hormone receptor signaling pathway	2/257	50/10946	1.7	0.328802	0.733219	gene-BRCA1/gene-WWTR1
GO:0033143	regulation of intracellular steroid hormone receptor signaling pathway	2/257	50/10946	1.7	0.328802	0.733219	gene-BRCA1/gene-WWTR1
GO:0035304	regulation of protein dephosphorylation	2/257	50/10946	1.7	0.328802	0.733219	gene-AKAP6/gene-DLC1
GO:0048010	vascular endothelial growth factor receptor signaling pathway	2/257	50/10946	1.7	0.328802	0.733219	gene-PGF/gene-SHC3
GO:0051294	establishment of spindle orientation	2/257	50/10946	1.7	0.328802	0.733219	gene-DLC1/gene-LLGL2
GO:1901222	regulation of NIK/NF-kappaB signaling	2/257	50/10946	1.7	0.328802	0.733219	gene-HDAC9/gene-TERF2IP
GO:1903524	positive regulation of blood circulation	2/257	50/10946	1.7	0.328802	0.733219	gene-MRGPRH/gene-SHC3
GO:2000379	positive regulation of reactive oxygen species metabolic process	2/257	50/10946	1.7	0.328802	0.733219	gene-GRB2/gene-HDAC9
GO:1901342	regulation of vasculature development	6/257	200/10946	1.28	0.329649	0.733219	gene-BRCA1/gene-DLC1/gene-HDAC9/gene-MYDGF/gene-PGF/gene-SHC3
GO:0007600	sensory perception	9/257	318/10946	1.21	0.331372	0.733219	gene-APBA1/gene-FAM65C/gene-MAP1A/gene-MRGPRH/gene-PCNT/gene-SLC4A9/gene-SNAI1/gene-TENM3/gene-TMEM132A
GO:0001763	morphogenesis of a branching structure	5/257	162/10946	1.31	0.332059	0.733219	gene-GRB2/gene-GRHL3/gene-KDM4B/gene-LLGL2/gene-WWTR1
GO:0000038	very long-chain fatty acid metabolic process	1/257	17/10946	2.51	0.33249	0.733219	gene-HACD4
GO:0000462	maturation of SSU-rRNA from tricistronic rRNA transcript (SSU-rRNA, 5.8S rRNA, LSU-rRNA)	1/257	17/10946	2.51	0.33249	0.733219	gene-FAM207A
GO:0002637	regulation of immunoglobulin production	1/257	17/10946	2.51	0.33249	0.733219	gene-TP53BP1
GO:0003203	endocardial cushion morphogenesis	1/257	17/10946	2.51	0.33249	0.733219	gene-SNAI1
GO:0006968	cellular defense response	1/257	17/10946	2.51	0.33249	0.733219	gene-BECN1
GO:0007406	negative regulation of neuroblast proliferation	1/257	17/10946	2.51	0.33249	0.733219	gene-LLGL2
GO:0009414	response to water deprivation	1/257	17/10946	2.51	0.33249	0.733219	gene-CD9
GO:0010665	regulation of cardiac muscle cell apoptotic process	1/257	17/10946	2.51	0.33249	0.733219	gene-NRG2
GO:0016574	histone ubiquitination	1/257	17/10946	2.51	0.33249	0.733219	gene-KDM2A
GO:0030195	negative regulation of blood coagulation	1/257	17/10946	2.51	0.33249	0.733219	gene-CD9
GO:0030206	chondroitin sulfate biosynthetic process	1/257	17/10946	2.51	0.33249	0.733219	gene-CHST4
GO:0032104	regulation of response to extracellular stimulus	1/257	17/10946	2.51	0.33249	0.733219	gene-SNAI1
GO:0032107	regulation of response to nutrient levels	1/257	17/10946	2.51	0.33249	0.733219	gene-SNAI1
GO:0032648	regulation of interferon-beta production	1/257	17/10946	2.51	0.33249	0.733219	gene-IFIH1
GO:0042447	hormone catabolic process	1/257	17/10946	2.51	0.33249	0.733219	gene-DIO2
GO:0045196	establishment or maintenance of neuroblast polarity	1/257	17/10946	2.51	0.33249	0.733219	gene-LLGL2
GO:0046461	neutral lipid catabolic process	1/257	17/10946	2.51	0.33249	0.733219	gene-LBFABP
GO:0046464	acylglycerol catabolic process	1/257	17/10946	2.51	0.33249	0.733219	gene-LBFABP
GO:0048713	regulation of oligodendrocyte differentiation	1/257	17/10946	2.51	0.33249	0.733219	gene-TENM3
GO:0050732	negative regulation of peptidyl-tyrosine phosphorylation	1/257	17/10946	2.51	0.33249	0.733219	gene-NTF3
GO:0051195	obsolete negative regulation of cofactor metabolic process	1/257	17/10946	2.51	0.33249	0.733219	gene-HDAC9
GO:0060760	positive regulation of response to cytokine stimulus	1/257	17/10946	2.51	0.33249	0.733219	gene-IFIH1
GO:0060914	heart formation	1/257	17/10946	2.51	0.33249	0.733219	gene-WWTR1
GO:0061037	negative regulation of cartilage development	1/257	17/10946	2.51	0.33249	0.733219	gene-SNAI1
GO:0061065	regulation of dauer larval development	1/257	17/10946	2.51	0.33249	0.733219	gene-RUNDC1
GO:0070983	dendrite guidance	1/257	17/10946	2.51	0.33249	0.733219	gene-TENM3
GO:0090279	regulation of calcium ion import	1/257	17/10946	2.51	0.33249	0.733219	gene-WNK4
GO:0098586	cellular response to virus	1/257	17/10946	2.51	0.33249	0.733219	gene-IFIH1
GO:0098901	regulation of cardiac muscle cell action potential	1/257	17/10946	2.51	0.33249	0.733219	gene-PCNT
GO:1900047	negative regulation of hemostasis	1/257	17/10946	2.51	0.33249	0.733219	gene-CD9
GO:1990542	mitochondrial transmembrane transport	1/257	17/10946	2.51	0.33249	0.733219	gene-SLC25A1
GO:2000114	regulation of establishment of cell polarity	1/257	17/10946	2.51	0.33249	0.733219	gene-FAM65C
GO:2000401	regulation of lymphocyte migration	1/257	17/10946	2.51	0.33249	0.733219	gene-FAM65C
GO:2001106	regulation of Rho guanyl-nucleotide exchange factor activity	1/257	17/10946	2.51	0.33249	0.733219	gene-FAM65C
GO:0043408	regulation of MAPK cascade	11/257	398/10946	1.18	0.333019	0.733811	gene-GRB2/gene-MYDGF/gene-NBR1/gene-NRG2/gene-NRXN3/gene-NTF3/gene-PHLPP2/gene-SHC3/gene-TNFAIP8L1/gene-WNK4/gene-ZNF821
GO:0006887	exocytosis	9/257	319/10946	1.2	0.334672	0.735325	gene-APBA1/gene-CD9/gene-CNTNAP1/gene-CNTNAP2/gene-LLGL2/gene-PGF/gene-SLC44A5/gene-SNAP29/gene-VWF
GO:0050890	cognition	9/257	319/10946	1.2	0.334672	0.735325	gene-APBB3/gene-EGFR/gene-HDAC9/gene-MAP1A/gene-NRG2/gene-NRXN3/gene-NTAN1/gene-NTF3/gene-SHC3
GO:0000075	cell cycle checkpoint	3/257	87/10946	1.47	0.335015	0.735325	gene-BRCA1/gene-SLF1/gene-TP53BP1
GO:0008064	regulation of actin polymerization or depolymerization	3/257	87/10946	1.47	0.335015	0.735325	gene-FER/gene-GRB2/gene-SSH3
GO:0015718	monocarboxylic acid transport	3/257	87/10946	1.47	0.335015	0.735325	gene-APBA1/gene-PLA2G4A/gene-PLIN3
GO:0006414	translational elongation	2/257	51/10946	1.67	0.337428	0.735451	gene-MRPS7/gene-SELENOT
GO:0008630	intrinsic apoptotic signaling pathway in response to DNA damage	2/257	51/10946	1.67	0.337428	0.735451	gene-BRCA1/gene-LOC121108310
GO:0040001	establishment of mitotic spindle localization	2/257	51/10946	1.67	0.337428	0.735451	gene-DLC1/gene-LLGL2
GO:0046470	phosphatidylcholine metabolic process	2/257	51/10946	1.67	0.337428	0.735451	gene-PLA2G4A/gene-SLC44A5
GO:0046822	regulation of nucleocytoplasmic transport	2/257	51/10946	1.67	0.337428	0.735451	gene-BRCA1/gene-CPSF7
GO:0048864	stem cell development	2/257	51/10946	1.67	0.337428	0.735451	gene-NRG2/gene-SNAI1
GO:0050775	positive regulation of dendrite morphogenesis	2/257	51/10946	1.67	0.337428	0.735451	gene-FAM151B/gene-FAM151BL
GO:0051591	response to cAMP	2/257	51/10946	1.67	0.337428	0.735451	gene-AKAP6/gene-PCNT
GO:2000243	positive regulation of reproductive process	2/257	51/10946	1.67	0.337428	0.735451	gene-RUNDC1/gene-ZNF821
GO:0050866	negative regulation of cell activation	3/257	88/10946	1.45	0.341467	0.73677	gene-CD9/gene-FAM65C/gene-FER
GO:1901184	regulation of ERBB signaling pathway	3/257	88/10946	1.45	0.341467	0.73677	gene-FER/gene-GRB2/gene-SHC3
GO:0032409	regulation of transporter activity	4/257	126/10946	1.35	0.343225	0.73677	gene-AKAP6/gene-NRXN3/gene-PCNT/gene-WNK4
GO:0046889	positive regulation of lipid biosynthetic process	2/257	52/10946	1.64	0.346022	0.73677	gene-CERS4/gene-PLA2G4A
GO:0002052	positive regulation of neuroblast proliferation	1/257	18/10946	2.37	0.348187	0.73677	gene-PGF
GO:0002181	cytoplasmic translation	1/257	18/10946	2.37	0.348187	0.73677	gene-PATL1
GO:0002712	regulation of B cell mediated immunity	1/257	18/10946	2.37	0.348187	0.73677	gene-TP53BP1
GO:0002889	regulation of immunoglobulin mediated immune response	1/257	18/10946	2.37	0.348187	0.73677	gene-TP53BP1
GO:0007045	cell-substrate junction assembly	1/257	18/10946	2.37	0.348187	0.73677	gene-DLC1
GO:0007176	regulation of epidermal growth factor-activated receptor activity	1/257	18/10946	2.37	0.348187	0.73677	gene-SHC3
GO:0010884	positive regulation of lipid storage	1/257	18/10946	2.37	0.348187	0.73677	gene-PLIN3
GO:0016325	oocyte microtubule cytoskeleton organization	1/257	18/10946	2.37	0.348187	0.73677	gene-LLGL2
GO:0021697	cerebellar cortex formation	1/257	18/10946	2.37	0.348187	0.73677	gene-NRXN3
GO:0030951	establishment or maintenance of microtubule cytoskeleton polarity	1/257	18/10946	2.37	0.348187	0.73677	gene-LLGL2
GO:0042149	cellular response to glucose starvation	1/257	18/10946	2.37	0.348187	0.73677	gene-BECN1
GO:0046662	regulation of oviposition	1/257	18/10946	2.37	0.348187	0.73677	gene-RUNDC1
GO:0048041	focal adhesion assembly	1/257	18/10946	2.37	0.348187	0.73677	gene-DLC1
GO:0051310	metaphase plate congression	1/257	18/10946	2.37	0.348187	0.73677	gene-BECN1
GO:0051497	negative regulation of stress fiber assembly	1/257	18/10946	2.37	0.348187	0.73677	gene-DLC1
GO:0060573	cell fate specification involved in pattern specification	1/257	18/10946	2.37	0.348187	0.73677	gene-EGFR
GO:0072378	blood coagulation, fibrin clot formation	1/257	18/10946	2.37	0.348187	0.73677	gene-VWF
GO:0090208	positive regulation of triglyceride metabolic process	1/257	18/10946	2.37	0.348187	0.73677	gene-PLIN3
GO:1900117	regulation of execution phase of apoptosis	1/257	18/10946	2.37	0.348187	0.73677	gene-DLC1
GO:1901223	negative regulation of NIK/NF-kappaB signaling	1/257	18/10946	2.37	0.348187	0.73677	gene-HDAC9
GO:1905097	regulation of guanyl-nucleotide exchange factor activity	1/257	18/10946	2.37	0.348187	0.73677	gene-FAM65C
GO:2000311	regulation of AMPA receptor activity	1/257	18/10946	2.37	0.348187	0.73677	gene-NRXN3
GO:0006790	sulfur compound metabolic process	4/257	127/10946	1.34	0.348578	0.73677	gene-BAAT/gene-CHST4/gene-CHST6/gene-SLC25A1
GO:0007626	locomotory behavior	7/257	244/10946	1.22	0.349164	0.73677	gene-ADGRL2/gene-APBA1/gene-MRGPRH/gene-NTAN1/gene-NTF3/gene-SLC4A9/gene-TRMT1L
GO:0098542	defense response to other organism	5/257	166/10946	1.28	0.350703	0.73677	gene-ANKHD1/gene-CORO1B/gene-IFIH1/gene-SHC3/gene-TNFAIP8L1
GO:0021953	central nervous system neuron differentiation	4/257	128/10946	1.33	0.353932	0.73677	gene-CDH10/gene-NRXN3/gene-SLC4A9/gene-TCTN3
GO:0060627	regulation of vesicle-mediated transport	8/257	285/10946	1.2	0.354202	0.73677	gene-BECN1/gene-FER/gene-FEZ1/gene-LLGL2/gene-NTF3/gene-PLA2G4A/gene-RUNDC1/gene-SNAP29
GO:0022037	metencephalon development	3/257	90/10946	1.42	0.354357	0.73677	gene-NRXN3/gene-PCNT/gene-SLC4A9
GO:0030832	regulation of actin filament length	3/257	90/10946	1.42	0.354357	0.73677	gene-FER/gene-GRB2/gene-SSH3
GO:0035051	cardiocyte differentiation	3/257	90/10946	1.42	0.354357	0.73677	gene-NRG2/gene-PROX2/gene-TENM3
GO:0060173	limb development	3/257	90/10946	1.42	0.354357	0.73677	gene-GRHL3/gene-PCNT/gene-TMEM231
GO:0006513	protein monoubiquitination	2/257	53/10946	1.61	0.354578	0.73677	gene-KDM2A/gene-LOC121108310
GO:0007525	somatic muscle development	2/257	53/10946	1.61	0.354578	0.73677	gene-CORO1B/gene-KDM2A
GO:0030500	regulation of bone mineralization	2/257	53/10946	1.61	0.354578	0.73677	gene-NBR1/gene-PLA2G4A
GO:0030865	cortical cytoskeleton organization	2/257	53/10946	1.61	0.354578	0.73677	gene-DLC1/gene-LLGL2
GO:0043123	positive regulation of I-kappaB kinase/NF-kappaB signaling	2/257	53/10946	1.61	0.354578	0.73677	gene-ANKHD1/gene-TERF2IP
GO:0061025	membrane fusion	2/257	53/10946	1.61	0.354578	0.73677	gene-CD9/gene-SNAP29
GO:0002064	epithelial cell development	9/257	325/10946	1.18	0.354582	0.73677	gene-EGFR/gene-FAM65C/gene-GRHL3/gene-PCNT/gene-PROX2/gene-SLC4A9/gene-TMEM132A/gene-UBAP2/gene-WWTR1
GO:0045184	establishment of protein localization	12/257	446/10946	1.15	0.355776	0.73677	gene-AKAP6/gene-APBA1/gene-BECN1/gene-FAM65C/gene-GGA3/gene-LLGL2/gene-MAP1A/gene-MCC/gene-NRXN3/gene-RUNDC1/gene-SELENOT/gene-SPATA2
GO:0001933	negative regulation of protein phosphorylation	7/257	246/10946	1.21	0.356837	0.73677	gene-FLRT2/gene-LLGL2/gene-NTF3/gene-PHLPP2/gene-TERF2IP/gene-WNK4/gene-ZNF821
GO:0035282	segmentation	6/257	207/10946	1.23	0.358929	0.73677	gene-EGFR/gene-GPC2/gene-IFIH1/gene-KDM2A/gene-LLGL2/gene-ZNF821
GO:0007596	blood coagulation	3/257	91/10946	1.4	0.360792	0.73677	gene-CD9/gene-MEGF10/gene-VWF
GO:0050817	coagulation	3/257	91/10946	1.4	0.360792	0.73677	gene-CD9/gene-MEGF10/gene-VWF
GO:1903362	regulation of cellular protein catabolic process	3/257	91/10946	1.4	0.360792	0.73677	gene-GABARAPL2/gene-MAP1A/gene-RNF114
GO:0009617	response to bacterium	8/257	287/10946	1.19	0.361327	0.73677	gene-ADGRL2/gene-ANKHD1/gene-FER/gene-HMCN1/gene-PLA2G4A/gene-SHC3/gene-TNFAIP8L1/gene-VWF
GO:0007442	hindgut morphogenesis	2/257	54/10946	1.58	0.363095	0.73677	gene-DLC1/gene-EGFR
GO:0035088	establishment or maintenance of apical/basal cell polarity	2/257	54/10946	1.58	0.363095	0.73677	gene-EGFR/gene-LLGL2
GO:0045746	negative regulation of Notch signaling pathway	2/257	54/10946	1.58	0.363095	0.73677	gene-LLGL2/gene-MEGF10
GO:0046467	membrane lipid biosynthetic process	2/257	54/10946	1.58	0.363095	0.73677	gene-CERS4/gene-HACD4
GO:0046888	negative regulation of hormone secretion	2/257	54/10946	1.58	0.363095	0.73677	gene-MRGPRH/gene-NRG2
GO:0055007	cardiac muscle cell differentiation	2/257	54/10946	1.58	0.363095	0.73677	gene-NRG2/gene-PROX2
GO:0061245	establishment or maintenance of bipolar cell polarity	2/257	54/10946	1.58	0.363095	0.73677	gene-EGFR/gene-LLGL2
GO:0061525	hindgut development	2/257	54/10946	1.58	0.363095	0.73677	gene-DLC1/gene-EGFR
GO:0070167	regulation of biomineral tissue development	2/257	54/10946	1.58	0.363095	0.73677	gene-NBR1/gene-PLA2G4A
GO:1903035	negative regulation of response to wounding	2/257	54/10946	1.58	0.363095	0.73677	gene-CD9/gene-CERS4
GO:0002076	osteoblast development	1/257	19/10946	2.24	0.363516	0.73677	gene-HDAC9
GO:0006284	base-excision repair	1/257	19/10946	2.24	0.363516	0.73677	gene-FEN1
GO:0006378	mRNA polyadenylation	1/257	19/10946	2.24	0.363516	0.73677	gene-CPSF7
GO:0007449	proximal/distal pattern formation, imaginal disc	1/257	19/10946	2.24	0.363516	0.73677	gene-EGFR
GO:0007526	larval somatic muscle development	1/257	19/10946	2.24	0.363516	0.73677	gene-KDM2A
GO:0010662	regulation of striated muscle cell apoptotic process	1/257	19/10946	2.24	0.363516	0.73677	gene-NRG2
GO:0010765	positive regulation of sodium ion transport	1/257	19/10946	2.24	0.363516	0.73677	gene-WNK4
GO:0031620	regulation of fever generation	1/257	19/10946	2.24	0.363516	0.73677	gene-PLA2G4A
GO:0031915	positive regulation of synaptic plasticity	1/257	19/10946	2.24	0.363516	0.73677	gene-MAP1A
GO:0032703	negative regulation of interleukin-2 production	1/257	19/10946	2.24	0.363516	0.73677	gene-HDAC9
GO:0036303	lymph vessel morphogenesis	1/257	19/10946	2.24	0.363516	0.73677	gene-PROX2
GO:0040026	positive regulation of vulval development	1/257	19/10946	2.24	0.363516	0.73677	gene-APBA1
GO:0042891	obsolete antibiotic transport	1/257	19/10946	2.24	0.363516	0.73677	gene-SLC25A1
GO:0043029	T cell homeostasis	1/257	19/10946	2.24	0.363516	0.73677	gene-CHST4
GO:0045022	early endosome to late endosome transport	1/257	19/10946	2.24	0.363516	0.73677	gene-BECN1
GO:0045939	negative regulation of steroid metabolic process	1/257	19/10946	2.24	0.363516	0.73677	gene-SNAI1
GO:0046940	nucleoside monophosphate phosphorylation	1/257	19/10946	2.24	0.363516	0.73677	gene-MPP2
GO:0048102	autophagic cell death	1/257	19/10946	2.24	0.363516	0.73677	gene-LLGL2
GO:0060008	Sertoli cell differentiation	1/257	19/10946	2.24	0.363516	0.73677	gene-PCNT
GO:0060465	pharynx development	1/257	19/10946	2.24	0.363516	0.73677	gene-TENM3
GO:0072132	mesenchyme morphogenesis	1/257	19/10946	2.24	0.363516	0.73677	gene-SNAI1
GO:0098927	vesicle-mediated transport between endosomal compartments	1/257	19/10946	2.24	0.363516	0.73677	gene-BECN1
GO:1901068	guanosine-containing compound metabolic process	1/257	19/10946	2.24	0.363516	0.73677	gene-MPP2
GO:1903077	negative regulation of protein localization to plasma membrane	1/257	19/10946	2.24	0.363516	0.73677	gene-ZNF821
GO:1904376	negative regulation of protein localization to cell periphery	1/257	19/10946	2.24	0.363516	0.73677	gene-ZNF821
GO:1905209	positive regulation of cardiocyte differentiation	1/257	19/10946	2.24	0.363516	0.73677	gene-AKAP6
GO:0031329	regulation of cellular catabolic process	10/257	368/10946	1.16	0.363851	0.73677	gene-ANKHD1/gene-BECN1/gene-FEZ1/gene-GABARAPL2/gene-HDAC9/gene-KDM4B/gene-MAP1A/gene-PLIN3/gene-RNF114/gene-TNFAIP8L1
GO:0045596	negative regulation of cell differentiation	12/257	449/10946	1.14	0.36435	0.73677	gene-ANKHD1/gene-APBB3/gene-CERS4/gene-DIO2/gene-EGFR/gene-GRHL3/gene-HDAC9/gene-KDM4B/gene-LLGL2/gene-NBR1/gene-SNAI1/gene-WWTR1
GO:0006937	regulation of muscle contraction	4/257	130/10946	1.31	0.36464	0.73677	gene-AKAP6/gene-HDAC9/gene-PCNT/gene-SHC3
GO:0030335	positive regulation of cell migration	8/257	288/10946	1.18	0.364896	0.73677	gene-FAM65C/gene-FER/gene-HDAC9/gene-HMCN1/gene-NTF3/gene-PGF/gene-SNAI1/gene-ZNF821
GO:0030155	regulation of cell adhesion	10/257	369/10946	1.15	0.367009	0.73677	gene-CD9/gene-DLC1/gene-FAM65C/gene-FER/gene-GRB2/gene-NRG2/gene-PGF/gene-SNAI1/gene-TENM3/gene-ZNF821
GO:1901566	organonitrogen compound biosynthetic process	12/257	450/10946	1.14	0.367215	0.73677	gene-CERS4/gene-CHST4/gene-CHST6/gene-HACD4/gene-MAN2A1/gene-MRPS7/gene-PATL1/gene-PLA2G4A/gene-SELENOT/gene-SLC25A1/gene-SLC44A5/gene-SLC4A9
GO:0002790	peptide secretion	3/257	92/10946	1.39	0.367217	0.73677	gene-BECN1/gene-GGA3/gene-SELENOT
GO:0007266	Rho protein signal transduction	3/257	92/10946	1.39	0.367217	0.73677	gene-DLC1/gene-FAM65C/gene-LOC121110409
GO:0007599	hemostasis	3/257	92/10946	1.39	0.367217	0.73677	gene-CD9/gene-MEGF10/gene-VWF
GO:0002066	columnar/cuboidal epithelial cell development	6/257	209/10946	1.22	0.367333	0.73677	gene-EGFR/gene-FAM65C/gene-SLC4A9/gene-TMEM132A/gene-UBAP2/gene-WWTR1
GO:0048514	blood vessel morphogenesis	6/257	209/10946	1.22	0.367333	0.73677	gene-BECN1/gene-HDAC9/gene-NRXN3/gene-PGF/gene-SHC3/gene-WWTR1
GO:0006518	peptide metabolic process	4/257	131/10946	1.3	0.369992	0.73677	gene-BECN1/gene-MRPS7/gene-PATL1/gene-SELENOT
GO:0016311	dephosphorylation	4/257	131/10946	1.3	0.369992	0.73677	gene-G6PC/gene-PHLPP2/gene-PTEN/gene-SSH3
GO:1901215	negative regulation of neuron death	4/257	131/10946	1.3	0.369992	0.73677	gene-HDAC9/gene-KDM2A/gene-MAP1A/gene-NTF3
GO:0010563	negative regulation of phosphorus metabolic process	9/257	330/10946	1.16	0.371296	0.73677	gene-FLRT2/gene-HDAC9/gene-LLGL2/gene-NTF3/gene-PHLPP2/gene-TERF2IP/gene-TMEM132A/gene-WNK4/gene-ZNF821
GO:0045936	negative regulation of phosphate metabolic process	9/257	330/10946	1.16	0.371296	0.73677	gene-FLRT2/gene-HDAC9/gene-LLGL2/gene-NTF3/gene-PHLPP2/gene-TERF2IP/gene-TMEM132A/gene-WNK4/gene-ZNF821
GO:0006939	smooth muscle contraction	2/257	55/10946	1.55	0.37157	0.73677	gene-HMCN1/gene-MRGPRH
GO:0032570	response to progesterone	2/257	55/10946	1.55	0.37157	0.73677	gene-NRG2/gene-WWTR1
GO:0044262	cellular carbohydrate metabolic process	2/257	55/10946	1.55	0.37157	0.73677	gene-BECN1/gene-G6PC
GO:0071260	cellular response to mechanical stimulus	2/257	55/10946	1.55	0.37157	0.73677	gene-FAM65C/gene-HDAC9
GO:1901568	fatty acid derivative metabolic process	2/257	55/10946	1.55	0.37157	0.73677	gene-PLA2G4A/gene-SLC25A1
GO:0007164	establishment of tissue polarity	3/257	93/10946	1.37	0.373631	0.73677	gene-EGFR/gene-GRHL3/gene-ZNF821
GO:0042254	ribosome biogenesis	3/257	93/10946	1.37	0.373631	0.73677	gene-MRPS7/gene-RRN3/gene-SRFBP1
GO:1902904	negative regulation of supramolecular fiber organization	3/257	93/10946	1.37	0.373631	0.73677	gene-DLC1/gene-MAP1A/gene-SSH3
GO:0030278	regulation of ossification	4/257	132/10946	1.29	0.375341	0.73677	gene-HDAC9/gene-NBR1/gene-PLA2G4A/gene-SNAI1
GO:0001542	ovulation from ovarian follicle	1/257	20/10946	2.13	0.378486	0.73677	gene-PLA2G4A
GO:0006356	regulation of transcription by RNA polymerase I	1/257	20/10946	2.13	0.378486	0.73677	gene-RRN3
GO:0006413	translational initiation	1/257	20/10946	2.13	0.378486	0.73677	gene-PATL1
GO:0006656	phosphatidylcholine biosynthetic process	1/257	20/10946	2.13	0.378486	0.73677	gene-SLC44A5
GO:0006891	intra-Golgi vesicle-mediated transport	1/257	20/10946	2.13	0.378486	0.73677	gene-GABARAPL2
GO:0006984	ER-nucleus signaling pathway	1/257	20/10946	2.13	0.378486	0.73677	gene-CERS4
GO:0007354	zygotic determination of anterior/posterior axis, embryo	1/257	20/10946	2.13	0.378486	0.73677	gene-ZNF821
GO:0007464	R3/R4 cell fate commitment	1/257	20/10946	2.13	0.378486	0.73677	gene-GRHL3
GO:0010543	regulation of platelet activation	1/257	20/10946	2.13	0.378486	0.73677	gene-CD9
GO:0010719	negative regulation of epithelial to mesenchymal transition	1/257	20/10946	2.13	0.378486	0.73677	gene-LLGL2
GO:0014017	neuroblast fate commitment	1/257	20/10946	2.13	0.378486	0.73677	gene-TCF4
GO:0015986	ATP synthesis coupled proton transport	1/257	20/10946	2.13	0.378486	0.73677	gene-ATP5H
GO:0021522	spinal cord motor neuron differentiation	1/257	20/10946	2.13	0.378486	0.73677	gene-TCTN3
GO:0030011	maintenance of cell polarity	1/257	20/10946	2.13	0.378486	0.73677	gene-LLGL2
GO:0030432	peristalsis	1/257	20/10946	2.13	0.378486	0.73677	gene-MRGPRH
GO:0031641	regulation of myelination	1/257	20/10946	2.13	0.378486	0.73677	gene-TENM3
GO:0033003	regulation of mast cell activation	1/257	20/10946	2.13	0.378486	0.73677	gene-FER
GO:0035601	protein deacylation	1/257	20/10946	2.13	0.378486	0.73677	gene-HDAC9
GO:0036149	phosphatidylinositol acyl-chain remodeling	1/257	20/10946	2.13	0.378486	0.73677	gene-PLA2G4A
GO:0043300	regulation of leukocyte degranulation	1/257	20/10946	2.13	0.378486	0.73677	gene-FER
GO:0043631	RNA polyadenylation	1/257	20/10946	2.13	0.378486	0.73677	gene-CPSF7
GO:0045176	apical protein localization	1/257	20/10946	2.13	0.378486	0.73677	gene-LLGL2
GO:0045610	regulation of hemocyte differentiation	1/257	20/10946	2.13	0.378486	0.73677	gene-EGFR
GO:0045792	negative regulation of cell size	1/257	20/10946	2.13	0.378486	0.73677	gene-SEMA4D
GO:0048056	R3/R4 cell differentiation	1/257	20/10946	2.13	0.378486	0.73677	gene-GRHL3
GO:0060123	regulation of growth hormone secretion	1/257	20/10946	2.13	0.378486	0.73677	gene-SELENOT
GO:0060143	positive regulation of syncytium formation by plasma membrane fusion	1/257	20/10946	2.13	0.378486	0.73677	gene-FAM65C
GO:0070316	regulation of G0 to G1 transition	1/257	20/10946	2.13	0.378486	0.73677	gene-BRCA1
GO:0071498	cellular response to fluid shear stress	1/257	20/10946	2.13	0.378486	0.73677	gene-HDAC9
GO:0071868	cellular response to monoamine stimulus	1/257	20/10946	2.13	0.378486	0.73677	gene-AKAP6
GO:0071870	cellular response to catecholamine stimulus	1/257	20/10946	2.13	0.378486	0.73677	gene-AKAP6
GO:0098732	macromolecule deacylation	1/257	20/10946	2.13	0.378486	0.73677	gene-HDAC9
GO:1901739	regulation of myoblast fusion	1/257	20/10946	2.13	0.378486	0.73677	gene-FAM65C
GO:1902042	negative regulation of extrinsic apoptotic signaling pathway via death domain receptors	1/257	20/10946	2.13	0.378486	0.73677	gene-BRCA1
GO:0051276	chromosome organization	12/257	454/10946	1.13	0.378705	0.73677	gene-APBB3/gene-BECN1/gene-CCNO/gene-HDAC9/gene-KDM2A/gene-KDM4B/gene-LOC107049269/gene-LOC121106525/gene-LOC121108310/gene-LOC124416955/gene-SLF1/gene-TERF2IP
GO:0001936	regulation of endothelial cell proliferation	2/257	56/10946	1.52	0.379999	0.73677	gene-MYDGF/gene-PGF
GO:0051291	protein heterooligomerization	2/257	56/10946	1.52	0.379999	0.73677	gene-CPSF7/gene-GRB2
GO:0061062	regulation of nematode larval development	2/257	56/10946	1.52	0.379999	0.73677	gene-APBA1/gene-RUNDC1
GO:0010921	regulation of phosphatase activity	3/257	94/10946	1.36	0.380032	0.73677	gene-AKAP6/gene-TMEM132A/gene-WNK4
GO:0010769	regulation of cell morphogenesis involved in differentiation	8/257	293/10946	1.16	0.382783	0.73677	gene-DLC1/gene-FAM151B/gene-FAM151BL/gene-FEZ1/gene-LOC121110409/gene-MAP1A/gene-SEMA4D/gene-SSH3
GO:0040013	negative regulation of locomotion	6/257	213/10946	1.2	0.384165	0.73677	gene-CERS4/gene-DLC1/gene-FAM65C/gene-HDAC9/gene-LLGL2/gene-MCC
GO:1901653	cellular response to peptide	6/257	213/10946	1.2	0.384165	0.73677	gene-DLC1/gene-FER/gene-GRB2/gene-HDAC9/gene-MAP1A/gene-SHC3
GO:2000147	positive regulation of cell motility	8/257	294/10946	1.16	0.386367	0.73677	gene-FAM65C/gene-FER/gene-HDAC9/gene-HMCN1/gene-NTF3/gene-PGF/gene-SNAI1/gene-ZNF821
GO:0001736	establishment of planar polarity	3/257	95/10946	1.34	0.38642	0.73677	gene-EGFR/gene-GRHL3/gene-ZNF821
GO:0008306	associative learning	3/257	95/10946	1.34	0.38642	0.73677	gene-APBB3/gene-EGFR/gene-MAP1A
GO:0009306	protein secretion	3/257	95/10946	1.34	0.38642	0.73677	gene-BECN1/gene-GGA3/gene-SELENOT
GO:0015893	drug transport	3/257	95/10946	1.34	0.38642	0.73677	gene-GIF/gene-SLC25A1/gene-SLC44A5
GO:0050731	positive regulation of peptidyl-tyrosine phosphorylation	3/257	95/10946	1.34	0.38642	0.73677	gene-NRG2/gene-NTF3/gene-PGF
GO:0048569	post-embryonic animal organ development	9/257	335/10946	1.14	0.388085	0.73677	gene-ARHGEF5/gene-DLC1/gene-EGFR/gene-GPC2/gene-KDM2A/gene-LLGL2/gene-LOC121106525/gene-TCF4/gene-TENM3
GO:0000724	double-strand break repair via homologous recombination	2/257	57/10946	1.49	0.388381	0.73677	gene-BRCA1/gene-LOC121106525
GO:0003143	embryonic heart tube morphogenesis	2/257	57/10946	1.49	0.388381	0.73677	gene-KDM2A/gene-WWTR1
GO:0008033	tRNA processing	2/257	57/10946	1.49	0.388381	0.73677	gene-ADAT1/gene-TRMT1L
GO:0009116	nucleoside metabolic process	2/257	57/10946	1.49	0.388381	0.73677	gene-DHFR/gene-MPP2
GO:0030968	endoplasmic reticulum unfolded protein response	2/257	57/10946	1.49	0.388381	0.73677	gene-MYDGF/gene-SHC3
GO:0033045	regulation of sister chromatid segregation	2/257	57/10946	1.49	0.388381	0.73677	gene-BECN1/gene-DLC1
GO:0051653	spindle localization	2/257	57/10946	1.49	0.388381	0.73677	gene-DLC1/gene-LLGL2
GO:1903670	regulation of sprouting angiogenesis	2/257	57/10946	1.49	0.388381	0.73677	gene-DLC1/gene-HDAC9
GO:0001764	neuron migration	4/257	135/10946	1.26	0.391363	0.73677	gene-ADGRL2/gene-APBB3/gene-MAP1A/gene-PCNT
GO:0007346	regulation of mitotic cell cycle	9/257	336/10946	1.14	0.391449	0.73677	gene-ANKHD1/gene-BECN1/gene-BRCA1/gene-DLC1/gene-EGFR/gene-FAM65C/gene-PCNT/gene-PLA2G4A/gene-TMEM231
GO:0071345	cellular response to cytokine stimulus	9/257	336/10946	1.14	0.391449	0.73677	gene-AKAP6/gene-BRCA1/gene-FAM65C/gene-FER/gene-FLRT2/gene-GRB2/gene-HDAC9/gene-PGF/gene-SHC3
GO:0045185	maintenance of protein location	3/257	96/10946	1.33	0.392792	0.73677	gene-LOC121106525/gene-LOC121108310/gene-SGCZ
GO:0048599	oocyte development	3/257	96/10946	1.33	0.392792	0.73677	gene-EGFR/gene-IFIH1/gene-LLGL2
GO:0002092	positive regulation of receptor internalization	1/257	21/10946	2.03	0.393105	0.73677	gene-NTF3
GO:0007016	obsolete cytoskeletal anchoring at plasma membrane	1/257	21/10946	2.03	0.393105	0.73677	gene-SGCZ
GO:0007205	protein kinase C-activating G protein-coupled receptor signaling pathway	1/257	21/10946	2.03	0.393105	0.73677	gene-DGKB
GO:0007638	mechanosensory behavior	1/257	21/10946	2.03	0.393105	0.73677	gene-NRXN3
GO:0009415	response to water	1/257	21/10946	2.03	0.393105	0.73677	gene-CD9
GO:0010226	response to lithium ion	1/257	21/10946	2.03	0.393105	0.73677	gene-PLA2G4A
GO:0010799	regulation of peptidyl-threonine phosphorylation	1/257	21/10946	2.03	0.393105	0.73677	gene-WNK4
GO:0010823	negative regulation of mitochondrion organization	1/257	21/10946	2.03	0.393105	0.73677	gene-ANKHD1
GO:0021533	cell differentiation in hindbrain	1/257	21/10946	2.03	0.393105	0.73677	gene-NRXN3
GO:0021772	olfactory bulb development	1/257	21/10946	2.03	0.393105	0.73677	gene-PCNT
GO:0021988	olfactory lobe development	1/257	21/10946	2.03	0.393105	0.73677	gene-PCNT
GO:0030073	insulin secretion	1/257	21/10946	2.03	0.393105	0.73677	gene-SELENOT
GO:0030260	entry into host	1/257	21/10946	2.03	0.393105	0.73677	gene-GRB2
GO:0030858	positive regulation of epithelial cell differentiation	1/257	21/10946	2.03	0.393105	0.73677	gene-ZNF821
GO:0032945	negative regulation of mononuclear cell proliferation	1/257	21/10946	2.03	0.393105	0.73677	gene-FAM65C
GO:0042478	regulation of eye photoreceptor cell development	1/257	21/10946	2.03	0.393105	0.73677	gene-DIO2
GO:0043491	protein kinase B signaling	1/257	21/10946	2.03	0.393105	0.73677	gene-MEGF10
GO:0044058	regulation of digestive system process	1/257	21/10946	2.03	0.393105	0.73677	gene-WNK4
GO:0044409	entry into host	1/257	21/10946	2.03	0.393105	0.73677	gene-GRB2
GO:0044458	motile cilium assembly	1/257	21/10946	2.03	0.393105	0.73677	gene-LLGL2
GO:0045465	R8 cell differentiation	1/257	21/10946	2.03	0.393105	0.73677	gene-KDM4B
GO:0045600	positive regulation of fat cell differentiation	1/257	21/10946	2.03	0.393105	0.73677	gene-SNAI1
GO:0050650	chondroitin sulfate proteoglycan biosynthetic process	1/257	21/10946	2.03	0.393105	0.73677	gene-CHST4
GO:0050672	negative regulation of lymphocyte proliferation	1/257	21/10946	2.03	0.393105	0.73677	gene-FAM65C
GO:0050819	negative regulation of coagulation	1/257	21/10946	2.03	0.393105	0.73677	gene-CD9
GO:0051150	regulation of smooth muscle cell differentiation	1/257	21/10946	2.03	0.393105	0.73677	gene-ANKHD1
GO:0051806	entry into host	1/257	21/10946	2.03	0.393105	0.73677	gene-GRB2
GO:0051828	entry into host	1/257	21/10946	2.03	0.393105	0.73677	gene-GRB2
GO:0060419	heart growth	1/257	21/10946	2.03	0.393105	0.73677	gene-TENM3
GO:0072578	neurotransmitter-gated ion channel clustering	1/257	21/10946	2.03	0.393105	0.73677	gene-NRXN3
GO:0090050	positive regulation of cell migration involved in sprouting angiogenesis	1/257	21/10946	2.03	0.393105	0.73677	gene-HDAC9
GO:0097696	receptor signaling pathway via STAT	1/257	21/10946	2.03	0.393105	0.73677	gene-FER
GO:0098930	axonal transport	1/257	21/10946	2.03	0.393105	0.73677	gene-MAP1A
GO:1901021	positive regulation of calcium ion transmembrane transporter activity	1/257	21/10946	2.03	0.393105	0.73677	gene-AKAP6
GO:1901264	carbohydrate derivative transport	1/257	21/10946	2.03	0.393105	0.73677	gene-G6PC
GO:1902229	regulation of intrinsic apoptotic signaling pathway in response to DNA damage	1/257	21/10946	2.03	0.393105	0.73677	gene-SNAI1
GO:1990928	response to amino acid starvation	1/257	21/10946	2.03	0.393105	0.73677	gene-BECN1
GO:2000725	regulation of cardiac muscle cell differentiation	1/257	21/10946	2.03	0.393105	0.73677	gene-AKAP6
GO:0001525	angiogenesis	4/257	136/10946	1.25	0.396692	0.739993	gene-BECN1/gene-NRXN3/gene-PGF/gene-SHC3
GO:0006892	post-Golgi vesicle-mediated transport	2/257	58/10946	1.47	0.396713	0.739993	gene-GGA3/gene-LLGL2
GO:0007478	leg disc morphogenesis	2/257	58/10946	1.47	0.396713	0.739993	gene-ARHGEF5/gene-GPC2
GO:0007480	imaginal disc-derived leg morphogenesis	2/257	58/10946	1.47	0.396713	0.739993	gene-ARHGEF5/gene-GPC2
GO:0048678	response to axon injury	2/257	58/10946	1.47	0.396713	0.739993	gene-CHST4/gene-MAP1A
GO:0051293	establishment of spindle localization	2/257	58/10946	1.47	0.396713	0.739993	gene-DLC1/gene-LLGL2
GO:0051222	positive regulation of protein transport	6/257	216/10946	1.18	0.396794	0.739993	gene-APBB3/gene-BRCA1/gene-FAM65C/gene-IFIH1/gene-PCNT/gene-PGF
GO:0007584	response to nutrient	5/257	176/10946	1.21	0.397459	0.739993	gene-BECN1/gene-BRCA1/gene-MAP1A/gene-PLA2G4A/gene-VWF
GO:0007613	memory	5/257	176/10946	1.21	0.397459	0.739993	gene-HDAC9/gene-MAP1A/gene-NRG2/gene-NTAN1/gene-NTF3
GO:0071902	positive regulation of protein serine/threonine kinase activity	5/257	176/10946	1.21	0.397459	0.739993	gene-AKAP6/gene-NRG2/gene-NRXN3/gene-NTF3/gene-SHC3
GO:0007088	regulation of mitotic nuclear division	3/257	97/10946	1.32	0.399147	0.742645	gene-BECN1/gene-DLC1/gene-FAM65C
GO:0042594	response to starvation	4/257	137/10946	1.24	0.402013	0.7432	gene-BECN1/gene-FAM65C/gene-GABARAPL2/gene-HDAC9
GO:1901990	regulation of mitotic cell cycle phase transition	5/257	177/10946	1.2	0.402127	0.7432	gene-ANKHD1/gene-BRCA1/gene-EGFR/gene-PCNT/gene-PLA2G4A
GO:0043624	cellular protein complex disassembly	2/257	59/10946	1.44	0.404992	0.7432	gene-MRPS7/gene-NRG2
GO:0044782	cilium organization	6/257	218/10946	1.17	0.405209	0.7432	gene-LLGL2/gene-PCNT/gene-TCTN3/gene-TMEM216/gene-TMEM231/gene-WWTR1
GO:0030178	negative regulation of Wnt signaling pathway	3/257	98/10946	1.3	0.405485	0.7432	gene-FER/gene-MCC/gene-SNAI1
GO:0045834	positive regulation of lipid metabolic process	3/257	98/10946	1.3	0.405485	0.7432	gene-CERS4/gene-PLA2G4A/gene-PLIN3
GO:0060560	developmental growth involved in morphogenesis	4/257	138/10946	1.23	0.407327	0.7432	gene-FER/gene-MAP1A/gene-MPP2/gene-WWTR1
GO:0002886	regulation of myeloid leukocyte mediated immunity	1/257	22/10946	1.94	0.407381	0.7432	gene-FER
GO:0006110	regulation of glycolytic process	1/257	22/10946	1.94	0.407381	0.7432	gene-HDAC9
GO:0007569	cell aging	1/257	22/10946	1.94	0.407381	0.7432	gene-BECN1
GO:0030811	regulation of nucleotide catabolic process	1/257	22/10946	1.94	0.407381	0.7432	gene-HDAC9
GO:0031650	regulation of heat generation	1/257	22/10946	1.94	0.407381	0.7432	gene-PLA2G4A
GO:0032094	response to food	1/257	22/10946	1.94	0.407381	0.7432	gene-G6PC
GO:0035075	response to ecdysone	1/257	22/10946	1.94	0.407381	0.7432	gene-LLGL2
GO:0035902	response to immobilization stress	1/257	22/10946	1.94	0.407381	0.7432	gene-VWF
GO:0036148	phosphatidylglycerol acyl-chain remodeling	1/257	22/10946	1.94	0.407381	0.7432	gene-PLA2G4A
GO:0036150	phosphatidylserine acyl-chain remodeling	1/257	22/10946	1.94	0.407381	0.7432	gene-PLA2G4A
GO:0040019	positive regulation of embryonic development	1/257	22/10946	1.94	0.407381	0.7432	gene-TENM3
GO:0040024	dauer larval development	1/257	22/10946	1.94	0.407381	0.7432	gene-BECN1
GO:0042136	neurotransmitter biosynthetic process	1/257	22/10946	1.94	0.407381	0.7432	gene-SLC44A5
GO:0042693	muscle cell fate commitment	1/257	22/10946	1.94	0.407381	0.7432	gene-EGFR
GO:0045616	regulation of keratinocyte differentiation	1/257	22/10946	1.94	0.407381	0.7432	gene-GRHL3
GO:0045923	positive regulation of fatty acid metabolic process	1/257	22/10946	1.94	0.407381	0.7432	gene-PLA2G4A
GO:0046148	pigment biosynthetic process	1/257	22/10946	1.94	0.407381	0.7432	gene-MAN2A1
GO:0048067	cuticle pigmentation	1/257	22/10946	1.94	0.407381	0.7432	gene-GPC2
GO:0048085	adult chitin-containing cuticle pigmentation	1/257	22/10946	1.94	0.407381	0.7432	gene-GPC2
GO:1900744	regulation of p38MAPK cascade	1/257	22/10946	1.94	0.407381	0.7432	gene-PHLPP2
GO:1902253	regulation of intrinsic apoptotic signaling pathway by p53 class mediator	1/257	22/10946	1.94	0.407381	0.7432	gene-RRN3
GO:1902745	positive regulation of lamellipodium organization	1/257	22/10946	1.94	0.407381	0.7432	gene-HDAC9
GO:2000463	positive regulation of excitatory postsynaptic potential	1/257	22/10946	1.94	0.407381	0.7432	gene-NRXN3
GO:0007431	salivary gland development	3/257	99/10946	1.29	0.411803	0.744183	gene-EGFR/gene-LLGL2/gene-TNFAIP8L1
GO:0001649	osteoblast differentiation	2/257	60/10946	1.42	0.413217	0.744183	gene-HDAC9/gene-SNAI1
GO:0032543	mitochondrial translation	2/257	60/10946	1.42	0.413217	0.744183	gene-MRPL16/gene-MRPS7
GO:0046580	negative regulation of Ras protein signal transduction	2/257	60/10946	1.42	0.413217	0.744183	gene-DLC1/gene-FAM65C
GO:0010038	response to metal ion	6/257	220/10946	1.16	0.413617	0.744183	gene-APBB3/gene-BECN1/gene-NRXN3/gene-PLA2G4A/gene-SHC3/gene-WNK4
GO:0042063	gliogenesis	6/257	220/10946	1.16	0.413617	0.744183	gene-CD9/gene-CNTNAP1/gene-CNTNAP2/gene-LOC121106525/gene-NTF3/gene-TENM3
GO:1902903	regulation of supramolecular fiber organization	6/257	220/10946	1.16	0.413617	0.744183	gene-DLC1/gene-FER/gene-GRB2/gene-MAP1A/gene-PCNT/gene-SSH3
GO:0031396	regulation of protein ubiquitination	3/257	100/10946	1.28	0.4181	0.744183	gene-BRCA1/gene-KDM2A/gene-LOC121108310
GO:0001945	lymph vessel development	1/257	23/10946	1.85	0.421323	0.744183	gene-PROX2
GO:0002675	positive regulation of acute inflammatory response	1/257	23/10946	1.85	0.421323	0.744183	gene-PLA2G4A
GO:0002824	positive regulation of adaptive immune response based on somatic recombination of immune receptors built from immunoglobulin superfamily domains	1/257	23/10946	1.85	0.421323	0.744183	gene-TP53BP1
GO:0007259	receptor signaling pathway via JAK-STAT	1/257	23/10946	1.85	0.421323	0.744183	gene-FER
GO:0007310	oocyte dorsal/ventral axis specification	1/257	23/10946	1.85	0.421323	0.744183	gene-EGFR
GO:0007593	chitin-based cuticle sclerotization	1/257	23/10946	1.85	0.421323	0.744183	gene-GPC2
GO:0010996	response to auditory stimulus	1/257	23/10946	1.85	0.421323	0.744183	gene-NRXN3
GO:0015695	organic cation transport	1/257	23/10946	1.85	0.421323	0.744183	gene-SLC44A5
GO:0016575	histone deacetylation	1/257	23/10946	1.85	0.421323	0.744183	gene-HDAC9
GO:0017085	response to insecticide	1/257	23/10946	1.85	0.421323	0.744183	gene-MAP1A
GO:0018107	peptidyl-threonine phosphorylation	1/257	23/10946	1.85	0.421323	0.744183	gene-WNK4
GO:0018210	peptidyl-threonine modification	1/257	23/10946	1.85	0.421323	0.744183	gene-WNK4
GO:0030490	maturation of SSU-rRNA	1/257	23/10946	1.85	0.421323	0.744183	gene-SRFBP1
GO:0032481	positive regulation of type I interferon production	1/257	23/10946	1.85	0.421323	0.744183	gene-IFIH1
GO:0034067	protein localization to Golgi apparatus	1/257	23/10946	1.85	0.421323	0.744183	gene-FAM65C
GO:0034198	cellular response to amino acid starvation	1/257	23/10946	1.85	0.421323	0.744183	gene-BECN1
GO:0035017	cuticle pattern formation	1/257	23/10946	1.85	0.421323	0.744183	gene-LLGL2
GO:0046785	microtubule polymerization	1/257	23/10946	1.85	0.421323	0.744183	gene-PCNT
GO:0048483	autonomic nervous system development	1/257	23/10946	1.85	0.421323	0.744183	gene-NTF3
GO:0048793	pronephros development	1/257	23/10946	1.85	0.421323	0.744183	gene-WWTR1
GO:0048857	neural nucleus development	1/257	23/10946	1.85	0.421323	0.744183	gene-SLC4A9
GO:0050881	musculoskeletal movement	1/257	23/10946	1.85	0.421323	0.744183	gene-MAP1A
GO:0051968	positive regulation of synaptic transmission, glutamatergic	1/257	23/10946	1.85	0.421323	0.744183	gene-NRXN3
GO:0060441	epithelial tube branching involved in lung morphogenesis	1/257	23/10946	1.85	0.421323	0.744183	gene-WWTR1
GO:0071869	response to catecholamine	1/257	23/10946	1.85	0.421323	0.744183	gene-AKAP6
GO:0072395	signal transduction involved in cell cycle checkpoint	1/257	23/10946	1.85	0.421323	0.744183	gene-BRCA1
GO:0072401	signal transduction involved in DNA integrity checkpoint	1/257	23/10946	1.85	0.421323	0.744183	gene-BRCA1
GO:0072422	signal transduction involved in DNA damage checkpoint	1/257	23/10946	1.85	0.421323	0.744183	gene-BRCA1
GO:1900147	regulation of Schwann cell migration	1/257	23/10946	1.85	0.421323	0.744183	gene-CERS4
GO:1902622	regulation of neutrophil migration	1/257	23/10946	1.85	0.421323	0.744183	gene-FAM65C
GO:1903963	arachidonate transport	1/257	23/10946	1.85	0.421323	0.744183	gene-PLA2G4A
GO:0006401	RNA catabolic process	2/257	61/10946	1.4	0.421385	0.744183	gene-PATL1/gene-SKIV2L2
GO:0009566	fertilization	2/257	61/10946	1.4	0.421385	0.744183	gene-CD9/gene-UBAP2
GO:0010923	negative regulation of phosphatase activity	2/257	61/10946	1.4	0.421385	0.744183	gene-TMEM132A/gene-WNK4
GO:0019229	regulation of vasoconstriction	2/257	61/10946	1.4	0.421385	0.744183	gene-MRGPRH/gene-SHC3
GO:0034614	cellular response to reactive oxygen species	2/257	61/10946	1.4	0.421385	0.744183	gene-BECN1/gene-FER
GO:1903510	mucopolysaccharide metabolic process	2/257	61/10946	1.4	0.421385	0.744183	gene-CHST4/gene-CHST6
GO:0007568	aging	8/257	304/10946	1.12	0.42225	0.744183	gene-BECN1/gene-CERS4/gene-EGFR/gene-GRB2/gene-MRGPRH/gene-PATL1/gene-PLA2G4A/gene-SHC3
GO:0010256	endomembrane system organization	7/257	263/10946	1.13	0.422395	0.744183	gene-GRHL3/gene-LOC121106525/gene-LOC121108310/gene-RUNDC1/gene-SNAP29/gene-TENM3/gene-TMEM231
GO:1904062	regulation of cation transmembrane transport	4/257	141/10946	1.21	0.423209	0.744183	gene-AKAP6/gene-NRXN3/gene-PCNT/gene-WNK4
GO:0048546	digestive tract morphogenesis	3/257	101/10946	1.27	0.424375	0.744183	gene-DLC1/gene-EGFR/gene-FER
GO:1903522	regulation of blood circulation	5/257	182/10946	1.17	0.425401	0.744183	gene-AKAP6/gene-HDAC9/gene-MRGPRH/gene-PCNT/gene-SHC3
GO:0031669	cellular response to nutrient levels	4/257	142/10946	1.2	0.428482	0.744183	gene-BECN1/gene-FAM65C/gene-GABARAPL2/gene-HDAC9
GO:0090068	positive regulation of cell cycle process	4/257	142/10946	1.2	0.428482	0.744183	gene-ANKHD1/gene-BECN1/gene-BRCA1/gene-FAM65C
GO:0010389	regulation of G2/M transition of mitotic cell cycle	2/257	62/10946	1.37	0.429495	0.744183	gene-BRCA1/gene-PCNT
GO:0031016	pancreas development	2/257	62/10946	1.37	0.429495	0.744183	gene-SELENOT/gene-WWTR1
GO:0034620	cellular response to unfolded protein	2/257	62/10946	1.37	0.429495	0.744183	gene-MYDGF/gene-SHC3
GO:0043401	steroid hormone mediated signaling pathway	2/257	62/10946	1.37	0.429495	0.744183	gene-BRCA1/gene-WWTR1
GO:0051058	negative regulation of small GTPase mediated signal transduction	2/257	62/10946	1.37	0.429495	0.744183	gene-DLC1/gene-FAM65C
GO:1901796	regulation of signal transduction by p53 class mediator	2/257	62/10946	1.37	0.429495	0.744183	gene-RRN3/gene-SNAI1
GO:0030900	forebrain development	7/257	265/10946	1.13	0.430099	0.744183	gene-DLC1/gene-KDM2A/gene-LOC121106525/gene-PCNT/gene-PHLPP2/gene-SLC4A9/gene-TCTN3
GO:0031667	response to nutrient levels	9/257	348/10946	1.1	0.431864	0.744183	gene-BECN1/gene-BRCA1/gene-FAM65C/gene-G6PC/gene-GABARAPL2/gene-HDAC9/gene-MAP1A/gene-PLA2G4A/gene-VWF
GO:0070372	regulation of ERK1 and ERK2 cascade	4/257	143/10946	1.19	0.433741	0.744183	gene-NRXN3/gene-PHLPP2/gene-SHC3/gene-WNK4
GO:0060271	cilium assembly	6/257	225/10946	1.14	0.434577	0.744183	gene-LLGL2/gene-PCNT/gene-TCTN3/gene-TMEM216/gene-TMEM231/gene-WWTR1
GO:0006826	iron ion transport	1/257	24/10946	1.77	0.434939	0.744183	gene-CP
GO:0007469	antennal development	1/257	24/10946	1.77	0.434939	0.744183	gene-EGFR
GO:0009135	purine nucleoside diphosphate metabolic process	1/257	24/10946	1.77	0.434939	0.744183	gene-MPP2
GO:0009179	purine ribonucleoside diphosphate metabolic process	1/257	24/10946	1.77	0.434939	0.744183	gene-MPP2
GO:0009185	ribonucleoside diphosphate metabolic process	1/257	24/10946	1.77	0.434939	0.744183	gene-MPP2
GO:0009649	entrainment of circadian clock	1/257	24/10946	1.77	0.434939	0.744183	gene-PHLPP2
GO:0010002	cardioblast differentiation	1/257	24/10946	1.77	0.434939	0.744183	gene-NRG2
GO:0010575	positive regulation of vascular endothelial growth factor production	1/257	24/10946	1.77	0.434939	0.744183	gene-BRCA1
GO:0010824	regulation of centrosome duplication	1/257	24/10946	1.77	0.434939	0.744183	gene-BRCA1
GO:0015701	bicarbonate transport	1/257	24/10946	1.77	0.434939	0.744183	gene-SLC4A9
GO:0019369	arachidonic acid metabolic process	1/257	24/10946	1.77	0.434939	0.744183	gene-PLA2G4A
GO:0021884	forebrain neuron development	1/257	24/10946	1.77	0.434939	0.744183	gene-SLC4A9
GO:0021957	corticospinal tract morphogenesis	1/257	24/10946	1.77	0.434939	0.744183	gene-CDH10
GO:0030166	proteoglycan biosynthetic process	1/257	24/10946	1.77	0.434939	0.744183	gene-CHST4
GO:0030431	sleep	1/257	24/10946	1.77	0.434939	0.744183	gene-DLC1
GO:0030521	androgen receptor signaling pathway	1/257	24/10946	1.77	0.434939	0.744183	gene-BRCA1
GO:0030947	regulation of vascular endothelial growth factor receptor signaling pathway	1/257	24/10946	1.77	0.434939	0.744183	gene-PGF
GO:0032232	negative regulation of actin filament bundle assembly	1/257	24/10946	1.77	0.434939	0.744183	gene-DLC1
GO:0032309	icosanoid secretion	1/257	24/10946	1.77	0.434939	0.744183	gene-PLA2G4A
GO:0033144	negative regulation of intracellular steroid hormone receptor signaling pathway	1/257	24/10946	1.77	0.434939	0.744183	gene-BRCA1
GO:0043129	surfactant homeostasis	1/257	24/10946	1.77	0.434939	0.744183	gene-PLA2G4A
GO:0043470	regulation of carbohydrate catabolic process	1/257	24/10946	1.77	0.434939	0.744183	gene-HDAC9
GO:0044331	cell-cell adhesion mediated by cadherin	1/257	24/10946	1.77	0.434939	0.744183	gene-FER
GO:0048681	negative regulation of axon regeneration	1/257	24/10946	1.77	0.434939	0.744183	gene-CERS4
GO:0048741	skeletal muscle fiber development	1/257	24/10946	1.77	0.434939	0.744183	gene-FAM65C
GO:0050879	multicellular organismal movement	1/257	24/10946	1.77	0.434939	0.744183	gene-MAP1A
GO:0051196	obsolete regulation of coenzyme metabolic process	1/257	24/10946	1.77	0.434939	0.744183	gene-HDAC9
GO:0051898	negative regulation of protein kinase B signaling	1/257	24/10946	1.77	0.434939	0.744183	gene-PHLPP2
GO:0061045	negative regulation of wound healing	1/257	24/10946	1.77	0.434939	0.744183	gene-CD9
GO:0070571	negative regulation of neuron projection regeneration	1/257	24/10946	1.77	0.434939	0.744183	gene-CERS4
GO:0071359	cellular response to dsRNA	1/257	24/10946	1.77	0.434939	0.744183	gene-IFIH1
GO:0071715	icosanoid transport	1/257	24/10946	1.77	0.434939	0.744183	gene-PLA2G4A
GO:0072176	nephric duct development	1/257	24/10946	1.77	0.434939	0.744183	gene-WWTR1
GO:0072376	protein activation cascade	1/257	24/10946	1.77	0.434939	0.744183	gene-VWF
GO:0072499	photoreceptor cell axon guidance	1/257	24/10946	1.77	0.434939	0.744183	gene-ZNF821
GO:0120033	negative regulation of plasma membrane bounded cell projection assembly	1/257	24/10946	1.77	0.434939	0.744183	gene-NRXN3
GO:1901571	fatty acid derivative transport	1/257	24/10946	1.77	0.434939	0.744183	gene-PLA2G4A
GO:1902893	regulation of pri-miRNA transcription by RNA polymerase II	1/257	24/10946	1.77	0.434939	0.744183	gene-HDAC9
GO:1905476	negative regulation of protein localization to membrane	1/257	24/10946	1.77	0.434939	0.744183	gene-ZNF821
GO:2000008	regulation of protein localization to cell surface	1/257	24/10946	1.77	0.434939	0.744183	gene-MAP1A
GO:0016053	organic acid biosynthetic process	3/257	103/10946	1.24	0.436855	0.745193	gene-BAAT/gene-HACD4/gene-PLA2G4A
GO:0034764	positive regulation of transmembrane transport	3/257	103/10946	1.24	0.436855	0.745193	gene-AKAP6/gene-PCNT/gene-WNK4
GO:0043043	peptide biosynthetic process	3/257	103/10946	1.24	0.436855	0.745193	gene-MRPS7/gene-PATL1/gene-SELENOT
GO:0046394	carboxylic acid biosynthetic process	3/257	103/10946	1.24	0.436855	0.745193	gene-BAAT/gene-HACD4/gene-PLA2G4A
GO:0098742	cell-cell adhesion via plasma-membrane adhesion molecules	3/257	103/10946	1.24	0.436855	0.745193	gene-ADGRL2/gene-NRXN3/gene-TENM3
GO:1904951	positive regulation of establishment of protein localization	6/257	226/10946	1.13	0.438755	0.747305	gene-APBB3/gene-BRCA1/gene-FAM65C/gene-IFIH1/gene-PCNT/gene-PGF
GO:0110053	regulation of actin filament organization	4/257	144/10946	1.18	0.438988	0.747305	gene-DLC1/gene-FER/gene-GRB2/gene-SSH3
GO:0044255	cellular lipid metabolic process	10/257	392/10946	1.09	0.440155	0.747305	gene-BAAT/gene-CERS4/gene-G6PC/gene-GRB2/gene-HACD4/gene-LBFABP/gene-NRG2/gene-PLA2G4A/gene-PLIN3/gene-SLC44A5
GO:0045786	negative regulation of cell cycle	6/257	227/10946	1.13	0.442928	0.747305	gene-APBB3/gene-BRCA1/gene-EGFR/gene-SLF1/gene-TMEM231/gene-TP53BP1
GO:0006260	DNA replication	3/257	104/10946	1.23	0.443057	0.747305	gene-BRCA1/gene-FEN1/gene-POLD4
GO:0050900	leukocyte migration	3/257	104/10946	1.23	0.443057	0.747305	gene-FER/gene-GRB2/gene-SHC3
GO:1901987	regulation of cell cycle phase transition	5/257	186/10946	1.14	0.4439	0.747305	gene-ANKHD1/gene-BRCA1/gene-EGFR/gene-PCNT/gene-PLA2G4A
GO:0045927	positive regulation of growth	7/257	269/10946	1.11	0.445466	0.747305	gene-AKAP6/gene-DIO2/gene-KDM2A/gene-MAP1A/gene-NRG2/gene-SLC44A5/gene-WWTR1
GO:0090630	activation of GTPase activity	2/257	64/10946	1.33	0.445532	0.747305	gene-NTF3/gene-RUNDC1
GO:0099173	postsynapse organization	2/257	64/10946	1.33	0.445532	0.747305	gene-NRXN3/gene-TENM3
GO:1901991	negative regulation of mitotic cell cycle phase transition	2/257	64/10946	1.33	0.445532	0.747305	gene-BRCA1/gene-EGFR
GO:0019216	regulation of lipid metabolic process	6/257	228/10946	1.12	0.447095	0.747305	gene-BRCA1/gene-CERS4/gene-GRHL3/gene-PLA2G4A/gene-PLIN3/gene-SNAI1
GO:0045087	innate immune response	6/257	228/10946	1.12	0.447095	0.747305	gene-ANKHD1/gene-ARHGEF5/gene-FER/gene-GRB2/gene-IFIH1/gene-SHC3
GO:0002090	regulation of receptor internalization	1/257	25/10946	1.7	0.448235	0.747305	gene-NTF3
GO:0002708	positive regulation of lymphocyte mediated immunity	1/257	25/10946	1.7	0.448235	0.747305	gene-TP53BP1
GO:0010165	response to X-ray	1/257	25/10946	1.7	0.448235	0.747305	gene-VWF
GO:0014821	phasic smooth muscle contraction	1/257	25/10946	1.7	0.448235	0.747305	gene-MRGPRH
GO:0014842	regulation of skeletal muscle satellite cell proliferation	1/257	25/10946	1.7	0.448235	0.747305	gene-GCFC2
GO:0034502	protein localization to chromosome	1/257	25/10946	1.7	0.448235	0.747305	gene-TERF2IP
GO:0036152	phosphatidylethanolamine acyl-chain remodeling	1/257	25/10946	1.7	0.448235	0.747305	gene-PLA2G4A
GO:0046471	phosphatidylglycerol metabolic process	1/257	25/10946	1.7	0.448235	0.747305	gene-PLA2G4A
GO:0046843	dorsal appendage formation	1/257	25/10946	1.7	0.448235	0.747305	gene-EGFR
GO:0050974	detection of mechanical stimulus involved in sensory perception	1/257	25/10946	1.7	0.448235	0.747305	gene-TMEM132A
GO:0051124	synaptic growth at neuromuscular junction	1/257	25/10946	1.7	0.448235	0.747305	gene-TENM3
GO:0051145	smooth muscle cell differentiation	1/257	25/10946	1.7	0.448235	0.747305	gene-NTF3
GO:0051646	mitochondrion localization	1/257	25/10946	1.7	0.448235	0.747305	gene-MAP1A
GO:0060317	cardiac epithelial to mesenchymal transition	1/257	25/10946	1.7	0.448235	0.747305	gene-SNAI1
GO:0061337	cardiac conduction	1/257	25/10946	1.7	0.448235	0.747305	gene-PCNT
GO:0070050	neuron cellular homeostasis	1/257	25/10946	1.7	0.448235	0.747305	gene-MAP1A
GO:0070301	cellular response to hydrogen peroxide	1/257	25/10946	1.7	0.448235	0.747305	gene-BECN1
GO:0070664	negative regulation of leukocyte proliferation	1/257	25/10946	1.7	0.448235	0.747305	gene-FAM65C
GO:0070741	response to interleukin-6	1/257	25/10946	1.7	0.448235	0.747305	gene-FER
GO:0071354	cellular response to interleukin-6	1/257	25/10946	1.7	0.448235	0.747305	gene-FER
GO:1903146	regulation of autophagy of mitochondrion	1/257	25/10946	1.7	0.448235	0.747305	gene-ANKHD1
GO:0044283	small molecule biosynthetic process	5/257	187/10946	1.14	0.448504	0.747305	gene-BAAT/gene-G6PC/gene-HACD4/gene-PLA2G4A/gene-SLC25A1
GO:0035272	exocrine system development	3/257	105/10946	1.22	0.449233	0.747305	gene-EGFR/gene-LLGL2/gene-TNFAIP8L1
GO:0046488	phosphatidylinositol metabolic process	3/257	105/10946	1.22	0.449233	0.747305	gene-GRB2/gene-NRG2/gene-PLA2G4A
GO:0051347	positive regulation of transferase activity	8/257	312/10946	1.09	0.450872	0.747305	gene-AKAP6/gene-GRHL3/gene-LOC121108310/gene-NRG2/gene-NRXN3/gene-NTF3/gene-SHC3/gene-WNK4
GO:0009991	response to extracellular stimulus	9/257	354/10946	1.08	0.452021	0.747305	gene-BECN1/gene-BRCA1/gene-FAM65C/gene-G6PC/gene-GABARAPL2/gene-HDAC9/gene-MAP1A/gene-PLA2G4A/gene-VWF
GO:0002685	regulation of leukocyte migration	2/257	65/10946	1.31	0.453457	0.747305	gene-FAM65C/gene-PGF
GO:0007616	long-term memory	2/257	65/10946	1.31	0.453457	0.747305	gene-HDAC9/gene-NTF3
GO:0031532	actin cytoskeleton reorganization	2/257	65/10946	1.31	0.453457	0.747305	gene-FER/gene-SHC3
GO:0034332	adherens junction organization	2/257	65/10946	1.31	0.453457	0.747305	gene-CDH10/gene-DLC1
GO:0048859	formation of anatomical boundary	2/257	65/10946	1.31	0.453457	0.747305	gene-GPC2/gene-NTF3
GO:0061097	regulation of protein tyrosine kinase activity	2/257	65/10946	1.31	0.453457	0.747305	gene-NRG2/gene-SHC3
GO:1902749	regulation of cell cycle G2/M phase transition	2/257	65/10946	1.31	0.453457	0.747305	gene-BRCA1/gene-PCNT
GO:0008593	regulation of Notch signaling pathway	3/257	106/10946	1.21	0.455381	0.747305	gene-LLGL2/gene-MEGF10/gene-ZFYVE16
GO:0072001	renal system development	6/257	230/10946	1.11	0.455409	0.747305	gene-DLC1/gene-EGFR/gene-HDAC9/gene-PCNT/gene-TCF4/gene-WWTR1
GO:0042327	positive regulation of phosphorylation	12/257	481/10946	1.06	0.456838	0.747305	gene-AKAP6/gene-EGFR/gene-MYDGF/gene-NRG2/gene-NRXN3/gene-NTF3/gene-PCNT/gene-PGF/gene-SHC3/gene-TERF2IP/gene-TNFAIP8L1/gene-WNK4
GO:0048608	reproductive structure development	9/257	356/10946	1.08	0.45872	0.747305	gene-EGFR/gene-GRB2/gene-GRHL3/gene-LLGL2/gene-PCNT/gene-PLA2G4A/gene-TCF4/gene-TENM3/gene-VWF
GO:0046661	male sex differentiation	4/257	148/10946	1.15	0.459829	0.747305	gene-BECN1/gene-PCNT/gene-TCF4/gene-TENM3
GO:0055001	muscle cell development	4/257	148/10946	1.15	0.459829	0.747305	gene-ANKHD1/gene-FAM65C/gene-MEGF10/gene-SGCZ
GO:1903827	regulation of cellular protein localization	7/257	273/10946	1.09	0.460764	0.747305	gene-BRCA1/gene-FAM65C/gene-MAP1A/gene-NRXN3/gene-PCNT/gene-WNK4/gene-ZNF821
GO:0002686	negative regulation of leukocyte migration	1/257	26/10946	1.64	0.461219	0.747305	gene-FAM65C
GO:0007026	negative regulation of microtubule depolymerization	1/257	26/10946	1.64	0.461219	0.747305	gene-MAP1A
GO:0009988	cell-cell recognition	1/257	26/10946	1.64	0.461219	0.747305	gene-UBAP2
GO:0010332	response to gamma radiation	1/257	26/10946	1.64	0.461219	0.747305	gene-WWTR1
GO:0010574	regulation of vascular endothelial growth factor production	1/257	26/10946	1.64	0.461219	0.747305	gene-BRCA1
GO:0014857	regulation of skeletal muscle cell proliferation	1/257	26/10946	1.64	0.461219	0.747305	gene-GCFC2
GO:0014904	myotube cell development	1/257	26/10946	1.64	0.461219	0.747305	gene-FAM65C
GO:0018991	oviposition	1/257	26/10946	1.64	0.461219	0.747305	gene-LOC121106525
GO:0031929	TOR signaling	1/257	26/10946	1.64	0.461219	0.747305	gene-SHC3
GO:0032506	cytokinetic process	1/257	26/10946	1.64	0.461219	0.747305	gene-DLC1
GO:0035025	positive regulation of Rho protein signal transduction	1/257	26/10946	1.64	0.461219	0.747305	gene-ARHGEF5
GO:0035825	homologous recombination	1/257	26/10946	1.64	0.461219	0.747305	gene-CNTD1
GO:0044319	wound healing, spreading of cells	1/257	26/10946	1.64	0.461219	0.747305	gene-SNAI1
GO:0046456	icosanoid biosynthetic process	1/257	26/10946	1.64	0.461219	0.747305	gene-PLA2G4A
GO:0046503	glycerolipid catabolic process	1/257	26/10946	1.64	0.461219	0.747305	gene-LBFABP
GO:0070307	lens fiber cell development	1/257	26/10946	1.64	0.461219	0.747305	gene-PROX2
GO:0071526	semaphorin-plexin signaling pathway	1/257	26/10946	1.64	0.461219	0.747305	gene-SEMA4D
GO:0071867	response to monoamine	1/257	26/10946	1.64	0.461219	0.747305	gene-AKAP6
GO:0072348	sulfur compound transport	1/257	26/10946	1.64	0.461219	0.747305	gene-SLC44A5
GO:0090183	regulation of kidney development	1/257	26/10946	1.64	0.461219	0.747305	gene-WWTR1
GO:0090505	epiboly involved in wound healing	1/257	26/10946	1.64	0.461219	0.747305	gene-SNAI1
GO:1904424	regulation of GTP binding	1/257	26/10946	1.64	0.461219	0.747305	gene-FAM65C
GO:1905953	negative regulation of lipid localization	1/257	26/10946	1.64	0.461219	0.747305	gene-NRG2
GO:2000573	positive regulation of DNA biosynthetic process	1/257	26/10946	1.64	0.461219	0.747305	gene-GRHL3
GO:0007413	axonal fasciculation	2/257	66/10946	1.29	0.461316	0.747305	gene-FEZ1/gene-TENM3
GO:0030326	embryonic limb morphogenesis	2/257	66/10946	1.29	0.461316	0.747305	gene-GRHL3/gene-TMEM231
GO:0035305	negative regulation of dephosphorylation	2/257	66/10946	1.29	0.461316	0.747305	gene-TMEM132A/gene-WNK4
GO:0045214	sarcomere organization	2/257	66/10946	1.29	0.461316	0.747305	gene-ANKHD1/gene-SGCZ
GO:0046683	response to organophosphorus	2/257	66/10946	1.29	0.461316	0.747305	gene-AKAP6/gene-PCNT
GO:0048580	regulation of post-embryonic development	2/257	66/10946	1.29	0.461316	0.747305	gene-APBA1/gene-RUNDC1
GO:0051053	negative regulation of DNA metabolic process	2/257	66/10946	1.29	0.461316	0.747305	gene-TERF2IP/gene-TP53BP1
GO:0072089	stem cell proliferation	2/257	66/10946	1.29	0.461316	0.747305	gene-LLGL2/gene-WWTR1
GO:0106030	neuron projection fasciculation	2/257	66/10946	1.29	0.461316	0.747305	gene-FEZ1/gene-TENM3
GO:0009994	oocyte differentiation	3/257	107/10946	1.19	0.4615	0.747305	gene-EGFR/gene-IFIH1/gene-LLGL2
GO:0040029	regulation of gene expression, epigenetic	3/257	107/10946	1.19	0.4615	0.747305	gene-BRCA1/gene-HDAC9/gene-IFIH1
GO:0061458	reproductive system development	9/257	357/10946	1.07	0.462065	0.747666	gene-EGFR/gene-GRB2/gene-GRHL3/gene-LLGL2/gene-PCNT/gene-PLA2G4A/gene-TCF4/gene-TENM3/gene-VWF
GO:0023014	signal transduction by protein phosphorylation	5/257	190/10946	1.12	0.462256	0.747666	gene-GRB2/gene-NRG2/gene-PCNT/gene-SHC3/gene-WNK4
GO:0015031	protein transport	11/257	441/10946	1.06	0.462551	0.747713	gene-AKAP6/gene-APBA1/gene-BECN1/gene-GGA3/gene-IST1/gene-MAP1A/gene-NUP85/gene-RUNDC1/gene-SELENOT/gene-SPATA2/gene-VPS37C
GO:0048839	inner ear development	4/257	149/10946	1.14	0.464999	0.751238	gene-FAM65C/gene-SLC44A5/gene-SLC4A9/gene-TMEM132A
GO:0006412	translation	5/257	191/10946	1.11	0.466818	0.751359	gene-MRPL19/gene-MRPS7/gene-PATL1/gene-RPL27/gene-SELENOT
GO:0033157	regulation of intracellular protein transport	3/257	108/10946	1.18	0.46759	0.751359	gene-BRCA1/gene-FAM65C/gene-PCNT
GO:0007435	salivary gland morphogenesis	2/257	67/10946	1.27	0.46911	0.751359	gene-LLGL2/gene-TNFAIP8L1
GO:0048661	positive regulation of smooth muscle cell proliferation	2/257	67/10946	1.27	0.46911	0.751359	gene-HDAC9/gene-SHC3
GO:0043161	proteasome-mediated ubiquitin-dependent protein catabolic process	4/257	150/10946	1.14	0.470152	0.751359	gene-DDB1/gene-KCTD2/gene-KDM2A/gene-LOC121108310
GO:0016032	viral process	3/257	109/10946	1.17	0.47365	0.751359	gene-LOC112531814/gene-LOC121108470/gene-LOC124417122
GO:0031503	protein-containing complex localization	3/257	109/10946	1.17	0.47365	0.751359	gene-AKAP6/gene-APBA1/gene-NRXN3
GO:0006099	tricarboxylic acid cycle	1/257	27/10946	1.58	0.4739	0.751359	gene-DLST
GO:0007129	synapsis	1/257	27/10946	1.58	0.4739	0.751359	gene-LOC121106525
GO:0021515	cell differentiation in spinal cord	1/257	27/10946	1.58	0.4739	0.751359	gene-TCTN3
GO:0021517	ventral spinal cord development	1/257	27/10946	1.58	0.4739	0.751359	gene-TCTN3
GO:0030072	peptide hormone secretion	1/257	27/10946	1.58	0.4739	0.751359	gene-SELENOT
GO:0036151	phosphatidylcholine acyl-chain remodeling	1/257	27/10946	1.58	0.4739	0.751359	gene-PLA2G4A
GO:0040036	regulation of fibroblast growth factor receptor signaling pathway	1/257	27/10946	1.58	0.4739	0.751359	gene-NRXN3
GO:0042052	rhabdomere development	1/257	27/10946	1.58	0.4739	0.751359	gene-GRHL3
GO:0042307	positive regulation of protein import into nucleus	1/257	27/10946	1.58	0.4739	0.751359	gene-BRCA1
GO:0043331	response to dsRNA	1/257	27/10946	1.58	0.4739	0.751359	gene-IFIH1
GO:0043966	histone H3 acetylation	1/257	27/10946	1.58	0.4739	0.751359	gene-SGF29
GO:0043967	histone H4 acetylation	1/257	27/10946	1.58	0.4739	0.751359	gene-APBB3
GO:0044060	regulation of endocrine process	1/257	27/10946	1.58	0.4739	0.751359	gene-NRG2
GO:0046128	purine ribonucleoside metabolic process	1/257	27/10946	1.58	0.4739	0.751359	gene-MPP2
GO:0046688	response to copper ion	1/257	27/10946	1.58	0.4739	0.751359	gene-BECN1
GO:0048146	positive regulation of fibroblast proliferation	1/257	27/10946	1.58	0.4739	0.751359	gene-CCNO
GO:0048875	chemical homeostasis within a tissue	1/257	27/10946	1.58	0.4739	0.751359	gene-PLA2G4A
GO:0060536	cartilage morphogenesis	1/257	27/10946	1.58	0.4739	0.751359	gene-SNAI1
GO:0061063	positive regulation of nematode larval development	1/257	27/10946	1.58	0.4739	0.751359	gene-APBA1
GO:0090174	organelle membrane fusion	1/257	27/10946	1.58	0.4739	0.751359	gene-SNAP29
GO:0090322	regulation of superoxide metabolic process	1/257	27/10946	1.58	0.4739	0.751359	gene-SHC3
GO:0097421	liver regeneration	1/257	27/10946	1.58	0.4739	0.751359	gene-VWF
GO:0098869	cellular oxidant detoxification	1/257	27/10946	1.58	0.4739	0.751359	gene-SELENOT
GO:1990748	cellular detoxification	1/257	27/10946	1.58	0.4739	0.751359	gene-SELENOT
GO:2001026	regulation of endothelial cell chemotaxis	1/257	27/10946	1.58	0.4739	0.751359	gene-SNAI1
GO:2001028	positive regulation of endothelial cell chemotaxis	1/257	27/10946	1.58	0.4739	0.751359	gene-SNAI1
GO:0031668	cellular response to extracellular stimulus	4/257	151/10946	1.13	0.475286	0.752617	gene-BECN1/gene-FAM65C/gene-GABARAPL2/gene-HDAC9
GO:0043523	regulation of neuron apoptotic process	4/257	151/10946	1.13	0.475286	0.752617	gene-HDAC9/gene-KDM2A/gene-MAP1A/gene-NTF3
GO:0045785	positive regulation of cell adhesion	5/257	193/10946	1.1	0.475908	0.752617	gene-GRB2/gene-NRG2/gene-PGF/gene-TENM3/gene-ZNF821
GO:0001578	microtubule bundle formation	2/257	68/10946	1.25	0.476836	0.752617	gene-FER/gene-MAP1A
GO:0010565	regulation of cellular ketone metabolic process	2/257	68/10946	1.25	0.476836	0.752617	gene-BRCA1/gene-PLA2G4A
GO:0014066	regulation of phosphatidylinositol 3-kinase signaling	2/257	68/10946	1.25	0.476836	0.752617	gene-BECN1/gene-MYDGF
GO:0051983	regulation of chromosome segregation	2/257	68/10946	1.25	0.476836	0.752617	gene-BECN1/gene-DLC1
GO:1901988	negative regulation of cell cycle phase transition	2/257	68/10946	1.25	0.476836	0.752617	gene-BRCA1/gene-EGFR
GO:0022409	positive regulation of cell-cell adhesion	3/257	110/10946	1.16	0.479678	0.755222	gene-GRB2/gene-TENM3/gene-ZNF821
GO:1902850	microtubule cytoskeleton organization involved in mitosis	3/257	110/10946	1.16	0.479678	0.755222	gene-DLC1/gene-LLGL2/gene-PCNT
GO:0032535	regulation of cellular component size	7/257	278/10946	1.07	0.479757	0.755222	gene-BECN1/gene-FER/gene-FEZ1/gene-GRB2/gene-MAP1A/gene-SEMA4D/gene-SSH3
GO:0009791	post-embryonic development	12/257	489/10946	1.05	0.479899	0.755222	gene-APBB3/gene-ARHGEF5/gene-BECN1/gene-DLC1/gene-EGFR/gene-GPC2/gene-KDM2A/gene-LLGL2/gene-LOC121106525/gene-SLC4A9/gene-TCF4/gene-TENM3
GO:0072347	response to anesthetic	2/257	69/10946	1.23	0.484493	0.755222	gene-ADGRL2/gene-HDAC9
GO:0007422	peripheral nervous system development	3/257	111/10946	1.15	0.485674	0.755222	gene-EGFR/gene-NTF3/gene-TCF4
GO:0008202	steroid metabolic process	3/257	111/10946	1.15	0.485674	0.755222	gene-BAAT/gene-G6PC/gene-LBFABP
GO:0001954	positive regulation of cell-matrix adhesion	1/257	28/10946	1.52	0.486282	0.755222	gene-PGF
GO:0007158	neuron cell-cell adhesion	1/257	28/10946	1.52	0.486282	0.755222	gene-NRXN3
GO:0007315	pole plasm assembly	1/257	28/10946	1.52	0.486282	0.755222	gene-IFIH1
GO:0007379	segment specification	1/257	28/10946	1.52	0.486282	0.755222	gene-KDM2A
GO:0010656	negative regulation of muscle cell apoptotic process	1/257	28/10946	1.52	0.486282	0.755222	gene-NRG2
GO:0021801	cerebral cortex radial glia guided migration	1/257	28/10946	1.52	0.486282	0.755222	gene-LOC121106525
GO:0022030	telencephalon glial cell migration	1/257	28/10946	1.52	0.486282	0.755222	gene-LOC121106525
GO:0032007	negative regulation of TOR signaling	1/257	28/10946	1.52	0.486282	0.755222	gene-TNFAIP8L1
GO:0032387	negative regulation of intracellular transport	1/257	28/10946	1.52	0.486282	0.755222	gene-MAP1A
GO:0034968	histone lysine methylation	1/257	28/10946	1.52	0.486282	0.755222	gene-SLF1
GO:0042278	purine nucleoside metabolic process	1/257	28/10946	1.52	0.486282	0.755222	gene-MPP2
GO:0045661	regulation of myoblast differentiation	1/257	28/10946	1.52	0.486282	0.755222	gene-FAM65C
GO:0048582	positive regulation of post-embryonic development	1/257	28/10946	1.52	0.486282	0.755222	gene-APBA1
GO:0048730	epidermis morphogenesis	1/257	28/10946	1.52	0.486282	0.755222	gene-LLGL2
GO:0051298	centrosome duplication	1/257	28/10946	1.52	0.486282	0.755222	gene-BRCA1
GO:0051865	protein autoubiquitination	1/257	28/10946	1.52	0.486282	0.755222	gene-BRCA1
GO:0060122	inner ear receptor cell stereocilium organization	1/257	28/10946	1.52	0.486282	0.755222	gene-FAM65C
GO:0061512	protein localization to cilium	1/257	28/10946	1.52	0.486282	0.755222	gene-TCTN3
GO:0098815	modulation of excitatory postsynaptic potential	1/257	28/10946	1.52	0.486282	0.755222	gene-NRXN3
GO:1900087	positive regulation of G1/S transition of mitotic cell cycle	1/257	28/10946	1.52	0.486282	0.755222	gene-ANKHD1
GO:1901616	organic hydroxy compound catabolic process	1/257	28/10946	1.52	0.486282	0.755222	gene-DIO2
GO:2000060	positive regulation of ubiquitin-dependent protein catabolic process	1/257	28/10946	1.52	0.486282	0.755222	gene-RNF114
GO:0006886	intracellular protein transport	10/257	407/10946	1.05	0.487608	0.756862	gene-AKAP6/gene-AP1G1/gene-APBA1/gene-CLTCL1/gene-GGA3/gene-MAP1A/gene-RAMP2/gene-RUNDC1/gene-STX3/gene-VPS11
GO:0006644	phospholipid metabolic process	5/257	196/10946	1.09	0.489447	0.758078	gene-GRB2/gene-NRG2/gene-PLA2G4A/gene-PLPP1/gene-SLC44A5
GO:0009314	response to radiation	7/257	281/10946	1.06	0.491069	0.758078	gene-APBB3/gene-BRCA1/gene-GRB2/gene-SLC4A9/gene-SNAI1/gene-VWF/gene-WWTR1
GO:0008045	motor neuron axon guidance	3/257	112/10946	1.14	0.491636	0.758078	gene-GPC2/gene-SEMA4D/gene-TENM3
GO:0051783	regulation of nuclear division	3/257	112/10946	1.14	0.491636	0.758078	gene-BECN1/gene-DLC1/gene-FAM65C
GO:1901888	regulation of cell junction assembly	2/257	70/10946	1.22	0.492082	0.758078	gene-DLC1/gene-SNAI1
GO:0001934	positive regulation of protein phosphorylation	11/257	451/10946	1.04	0.492576	0.758078	gene-AKAP6/gene-MYDGF/gene-NRG2/gene-NRXN3/gene-NTF3/gene-PCNT/gene-PGF/gene-SHC3/gene-TERF2IP/gene-TNFAIP8L1/gene-WNK4
GO:0061061	muscle structure development	11/257	451/10946	1.04	0.492576	0.758078	gene-ANKHD1/gene-CORO1B/gene-EGFR/gene-FAM65C/gene-KDM2A/gene-MEGF10/gene-NRG2/gene-NTF3/gene-PROX2/gene-SGCZ/gene-TCF4
GO:0008344	adult locomotory behavior	3/257	113/10946	1.13	0.497565	0.758078	gene-NTAN1/gene-NTF3/gene-TRMT1L
GO:0009743	response to carbohydrate	3/257	113/10946	1.13	0.497565	0.758078	gene-MAP1A/gene-SELENOT/gene-VWF
GO:0043588	skin development	3/257	113/10946	1.13	0.497565	0.758078	gene-GRHL3/gene-LLGL2/gene-WWTR1
GO:1903531	negative regulation of secretion by cell	3/257	113/10946	1.13	0.497565	0.758078	gene-MRGPRH/gene-NRG2/gene-SNAP29
GO:1990778	protein localization to cell periphery	3/257	113/10946	1.13	0.497565	0.758078	gene-APBA1/gene-LLGL2/gene-WNK4
GO:0001702	gastrulation with mouth forming second	1/257	29/10946	1.47	0.498375	0.758078	gene-TENM3
GO:0002260	lymphocyte homeostasis	1/257	29/10946	1.47	0.498375	0.758078	gene-CHST4
GO:0002821	positive regulation of adaptive immune response	1/257	29/10946	1.47	0.498375	0.758078	gene-TP53BP1
GO:0006658	phosphatidylserine metabolic process	1/257	29/10946	1.47	0.498375	0.758078	gene-PLA2G4A
GO:0007419	ventral cord development	1/257	29/10946	1.47	0.498375	0.758078	gene-GRHL3
GO:0009108	obsolete coenzyme biosynthetic process	1/257	29/10946	1.47	0.498375	0.758078	gene-SLC25A1
GO:0009132	nucleoside diphosphate metabolic process	1/257	29/10946	1.47	0.498375	0.758078	gene-MPP2
GO:0019915	lipid storage	1/257	29/10946	1.47	0.498375	0.758078	gene-PLIN3
GO:0021799	cerebral cortex radially oriented cell migration	1/257	29/10946	1.47	0.498375	0.758078	gene-LOC121106525
GO:0030728	ovulation	1/257	29/10946	1.47	0.498375	0.758078	gene-PLA2G4A
GO:0030837	negative regulation of actin filament polymerization	1/257	29/10946	1.47	0.498375	0.758078	gene-SSH3
GO:0030952	establishment or maintenance of cytoskeleton polarity	1/257	29/10946	1.47	0.498375	0.758078	gene-LLGL2
GO:0032755	positive regulation of interleukin-6 production	1/257	29/10946	1.47	0.498375	0.758078	gene-IFIH1
GO:0032760	positive regulation of tumor necrosis factor production	1/257	29/10946	1.47	0.498375	0.758078	gene-IFIH1
GO:0035914	skeletal muscle cell differentiation	1/257	29/10946	1.47	0.498375	0.758078	gene-MEGF10
GO:0045740	positive regulation of DNA replication	1/257	29/10946	1.47	0.498375	0.758078	gene-SHC3
GO:0045814	negative regulation of gene expression, epigenetic	1/257	29/10946	1.47	0.498375	0.758078	gene-HDAC9
GO:0045880	positive regulation of smoothened signaling pathway	1/257	29/10946	1.47	0.498375	0.758078	gene-GPC2
GO:0050891	multicellular organismal water homeostasis	1/257	29/10946	1.47	0.498375	0.758078	gene-GRHL3
GO:0061384	heart trabecula morphogenesis	1/257	29/10946	1.47	0.498375	0.758078	gene-NRG2
GO:0098781	ncRNA transcription	1/257	29/10946	1.47	0.498375	0.758078	gene-RRN3
GO:1901224	positive regulation of NIK/NF-kappaB signaling	1/257	29/10946	1.47	0.498375	0.758078	gene-TERF2IP
GO:1902041	regulation of extrinsic apoptotic signaling pathway via death domain receptors	1/257	29/10946	1.47	0.498375	0.758078	gene-BRCA1
GO:1903557	positive regulation of tumor necrosis factor superfamily cytokine production	1/257	29/10946	1.47	0.498375	0.758078	gene-IFIH1
GO:2001169	regulation of ATP biosynthetic process	1/257	29/10946	1.47	0.498375	0.758078	gene-HDAC9
GO:0002703	regulation of leukocyte mediated immunity	2/257	71/10946	1.2	0.499599	0.758708	gene-FER/gene-TP53BP1
GO:0030203	glycosaminoglycan metabolic process	2/257	71/10946	1.2	0.499599	0.758708	gene-CHST4/gene-CHST6
GO:0043122	regulation of I-kappaB kinase/NF-kappaB signaling	2/257	71/10946	1.2	0.499599	0.758708	gene-ANKHD1/gene-TERF2IP
GO:0010243	response to organonitrogen compound	12/257	498/10946	1.03	0.505629	0.759188	gene-ADGRL2/gene-AKAP6/gene-BRCA1/gene-CD9/gene-DLC1/gene-FER/gene-GRB2/gene-HDAC9/gene-MAP1A/gene-PCNT/gene-PLA2G4A/gene-SHC3
GO:0006022	aminoglycan metabolic process	2/257	72/10946	1.18	0.507045	0.759188	gene-CHST4/gene-CHST6
GO:0072330	monocarboxylic acid biosynthetic process	2/257	72/10946	1.18	0.507045	0.759188	gene-BAAT/gene-HACD4
GO:0006631	fatty acid metabolic process	3/257	115/10946	1.11	0.509318	0.759188	gene-BAAT/gene-HACD4/gene-PLA2G4A
GO:0030522	intracellular receptor signaling pathway	3/257	115/10946	1.11	0.509318	0.759188	gene-BRCA1/gene-IFIH1/gene-WWTR1
GO:0045930	negative regulation of mitotic cell cycle	3/257	115/10946	1.11	0.509318	0.759188	gene-BRCA1/gene-EGFR/gene-TMEM231
GO:0046474	glycerophospholipid biosynthetic process	3/257	115/10946	1.11	0.509318	0.759188	gene-GRB2/gene-PLA2G4A/gene-SLC44A5
GO:0002431	Fc receptor mediated stimulatory signaling pathway	1/257	30/10946	1.42	0.510184	0.759188	gene-GRB2
GO:0002433	immune response-regulating cell surface receptor signaling pathway involved in phagocytosis	1/257	30/10946	1.42	0.510184	0.759188	gene-GRB2
GO:0006342	chromatin silencing	1/257	30/10946	1.42	0.510184	0.759188	gene-HDAC9
GO:0007602	phototransduction	1/257	30/10946	1.42	0.510184	0.759188	gene-OPNVA
GO:0021591	ventricular system development	1/257	30/10946	1.42	0.510184	0.759188	gene-KDM2A
GO:0030204	chondroitin sulfate metabolic process	1/257	30/10946	1.42	0.510184	0.759188	gene-CHST4
GO:0030513	positive regulation of BMP signaling pathway	1/257	30/10946	1.42	0.510184	0.759188	gene-GPC2
GO:0030901	midbrain development	1/257	30/10946	1.42	0.510184	0.759188	gene-KDM2A
GO:0031109	microtubule polymerization or depolymerization	1/257	30/10946	1.42	0.510184	0.759188	gene-PCNT
GO:0032330	regulation of chondrocyte differentiation	1/257	30/10946	1.42	0.510184	0.759188	gene-SNAI1
GO:0035845	photoreceptor cell outer segment organization	1/257	30/10946	1.42	0.510184	0.759188	gene-LOC121108310
GO:0038094	Fc-gamma receptor signaling pathway	1/257	30/10946	1.42	0.510184	0.759188	gene-GRB2
GO:0038096	Fc-gamma receptor signaling pathway involved in phagocytosis	1/257	30/10946	1.42	0.510184	0.759188	gene-GRB2
GO:0042129	regulation of T cell proliferation	1/257	30/10946	1.42	0.510184	0.759188	gene-FAM65C
GO:0044062	regulation of excretion	1/257	30/10946	1.42	0.510184	0.759188	gene-RUNDC1
GO:0045840	positive regulation of mitotic nuclear division	1/257	30/10946	1.42	0.510184	0.759188	gene-BECN1
GO:0045886	negative regulation of synaptic growth at neuromuscular junction	1/257	30/10946	1.42	0.510184	0.759188	gene-PATL1
GO:0048008	platelet-derived growth factor receptor signaling pathway	1/257	30/10946	1.42	0.510184	0.759188	gene-FER
GO:0048149	behavioral response to ethanol	1/257	30/10946	1.42	0.510184	0.759188	gene-EGFR
GO:0050482	arachidonic acid secretion	1/257	30/10946	1.42	0.510184	0.759188	gene-PLA2G4A
GO:0055010	ventricular cardiac muscle tissue morphogenesis	1/257	30/10946	1.42	0.510184	0.759188	gene-NRG2
GO:0055059	asymmetric neuroblast division	1/257	30/10946	1.42	0.510184	0.759188	gene-LLGL2
GO:0060688	regulation of morphogenesis of a branching structure	1/257	30/10946	1.42	0.510184	0.759188	gene-SNAI1
GO:0070306	lens fiber cell differentiation	1/257	30/10946	1.42	0.510184	0.759188	gene-PROX2
GO:0070830	bicellular tight junction assembly	1/257	30/10946	1.42	0.510184	0.759188	gene-GRHL3
GO:1901800	positive regulation of proteasomal protein catabolic process	1/257	30/10946	1.42	0.510184	0.759188	gene-RNF114
GO:1902808	positive regulation of cell cycle G1/S phase transition	1/257	30/10946	1.42	0.510184	0.759188	gene-ANKHD1
GO:1903428	positive regulation of reactive oxygen species biosynthetic process	1/257	30/10946	1.42	0.510184	0.759188	gene-HDAC9
GO:1904427	positive regulation of calcium ion transmembrane transport	1/257	30/10946	1.42	0.510184	0.759188	gene-AKAP6
GO:1904591	positive regulation of protein import	1/257	30/10946	1.42	0.510184	0.759188	gene-BRCA1
GO:2001222	regulation of neuron migration	1/257	30/10946	1.42	0.510184	0.759188	gene-FLRT2
GO:0050773	regulation of dendrite development	4/257	158/10946	1.08	0.510672	0.759461	gene-DLC1/gene-FAM151B/gene-FAM151BL/gene-LOC121110409
GO:0006468	protein phosphorylation	11/257	458/10946	1.02	0.513373	0.759461	gene-CCNO/gene-EGFR/gene-FER/gene-GRB2/gene-NRG2/gene-PCNT/gene-RPS6KL1/gene-SHC3/gene-SIK2/gene-WNK4/gene-WWTR1
GO:0002695	negative regulation of leukocyte activation	2/257	73/10946	1.17	0.514419	0.759461	gene-FAM65C/gene-FER
GO:0006986	response to unfolded protein	2/257	73/10946	1.17	0.514419	0.759461	gene-MYDGF/gene-SHC3
GO:0035967	cellular response to topologically incorrect protein	2/257	73/10946	1.17	0.514419	0.759461	gene-MYDGF/gene-SHC3
GO:0001889	liver development	3/257	116/10946	1.1	0.51514	0.759461	gene-BAAT/gene-MAN2A1/gene-VWF
GO:0045017	glycerolipid biosynthetic process	3/257	116/10946	1.1	0.51514	0.759461	gene-GRB2/gene-PLA2G4A/gene-SLC44A5
GO:0048639	positive regulation of developmental growth	5/257	202/10946	1.05	0.516137	0.759461	gene-AKAP6/gene-DIO2/gene-MAP1A/gene-NRG2/gene-WWTR1
GO:0032956	regulation of actin cytoskeleton organization	5/257	203/10946	1.05	0.52053	0.759461	gene-DLC1/gene-FER/gene-GRB2/gene-NTF3/gene-SSH3
GO:0050804	modulation of chemical synaptic transmission	7/257	289/10946	1.03	0.520862	0.759461	gene-ARHGEF5/gene-DLC1/gene-GRID2/gene-MAP1A/gene-MPP2/gene-NRXN3/gene-NTF3
GO:0006909	phagocytosis	3/257	117/10946	1.09	0.520926	0.759461	gene-BECN1/gene-GRB2/gene-MEGF10
GO:0061008	hepaticobiliary system development	3/257	117/10946	1.09	0.520926	0.759461	gene-BAAT/gene-MAN2A1/gene-VWF
GO:1905475	regulation of protein localization to membrane	3/257	117/10946	1.09	0.520926	0.759461	gene-NRXN3/gene-WNK4/gene-ZNF821
GO:0002833	positive regulation of response to biotic stimulus	1/257	31/10946	1.37	0.521716	0.759461	gene-ANKHD1
GO:0006654	phosphatidic acid biosynthetic process	1/257	31/10946	1.37	0.521716	0.759461	gene-PLA2G4A
GO:0006906	vesicle fusion	1/257	31/10946	1.37	0.521716	0.759461	gene-SNAP29
GO:0009308	amine metabolic process	1/257	31/10946	1.37	0.521716	0.759461	gene-AOC3
GO:0016322	neuron remodeling	1/257	31/10946	1.37	0.521716	0.759461	gene-BECN1
GO:0030104	water homeostasis	1/257	31/10946	1.37	0.521716	0.759461	gene-GRHL3
GO:0030193	regulation of blood coagulation	1/257	31/10946	1.37	0.521716	0.759461	gene-CD9
GO:0030330	DNA damage response, signal transduction by p53 class mediator	1/257	31/10946	1.37	0.521716	0.759461	gene-BRCA1
GO:0031124	mRNA 3'-end processing	1/257	31/10946	1.37	0.521716	0.759461	gene-CPSF7
GO:0033628	regulation of cell adhesion mediated by integrin	1/257	31/10946	1.37	0.521716	0.759461	gene-SNAI1
GO:0036092	phosphatidylinositol-3-phosphate biosynthetic process	1/257	31/10946	1.37	0.521716	0.759461	gene-GRB2
GO:0046473	phosphatidic acid metabolic process	1/257	31/10946	1.37	0.521716	0.759461	gene-PLA2G4A
GO:0046513	ceramide biosynthetic process	1/257	31/10946	1.37	0.521716	0.759461	gene-CERS4
GO:0048286	lung alveolus development	1/257	31/10946	1.37	0.521716	0.759461	gene-MAN2A1
GO:0048596	embryonic camera-type eye morphogenesis	1/257	31/10946	1.37	0.521716	0.759461	gene-KDM2A
GO:0050654	chondroitin sulfate proteoglycan metabolic process	1/257	31/10946	1.37	0.521716	0.759461	gene-CHST4
GO:0051785	positive regulation of nuclear division	1/257	31/10946	1.37	0.521716	0.759461	gene-BECN1
GO:0060581	cell fate commitment involved in pattern specification	1/257	31/10946	1.37	0.521716	0.759461	gene-EGFR
GO:0061162	establishment of monopolar cell polarity	1/257	31/10946	1.37	0.521716	0.759461	gene-MAP1A
GO:0061339	establishment or maintenance of monopolar cell polarity	1/257	31/10946	1.37	0.521716	0.759461	gene-MAP1A
GO:0090504	epiboly	1/257	31/10946	1.37	0.521716	0.759461	gene-SNAI1
GO:1900046	regulation of hemostasis	1/257	31/10946	1.37	0.521716	0.759461	gene-CD9
GO:1903672	positive regulation of sprouting angiogenesis	1/257	31/10946	1.37	0.521716	0.759461	gene-HDAC9
GO:1903975	regulation of glial cell migration	1/257	31/10946	1.37	0.521716	0.759461	gene-CERS4
GO:0007030	Golgi organization	2/257	74/10946	1.15	0.52172	0.759461	gene-SNAP29/gene-TMEM231
GO:0007052	mitotic spindle organization	2/257	74/10946	1.15	0.52172	0.759461	gene-DLC1/gene-PCNT
GO:0031333	negative regulation of protein-containing complex assembly	2/257	74/10946	1.15	0.52172	0.759461	gene-PATL1/gene-SSH3
GO:0031644	regulation of nervous system process	2/257	74/10946	1.15	0.52172	0.759461	gene-NRXN3/gene-TENM3
GO:0043902	positive regulation of multi-organism process	2/257	74/10946	1.15	0.52172	0.759461	gene-ANKHD1/gene-ZNF821
GO:0032787	monocarboxylic acid metabolic process	4/257	161/10946	1.06	0.525507	0.762804	gene-BAAT/gene-HACD4/gene-LBFABP/gene-PLA2G4A
GO:0046777	protein autophosphorylation	3/257	118/10946	1.08	0.526674	0.762804	gene-FER/gene-GRB2/gene-WNK4
GO:0000226	microtubule cytoskeleton organization	9/257	377/10946	1.02	0.527956	0.762804	gene-BRCA1/gene-DLC1/gene-FER/gene-LLGL2/gene-LOC121106525/gene-LOC121108310/gene-MAP1A/gene-PCNT/gene-TENM3
GO:0048568	embryonic organ development	8/257	334/10946	1.02	0.52802	0.762804	gene-FAM65C/gene-GRB2/gene-GRHL3/gene-KDM2A/gene-LLGL2/gene-PCNT/gene-SLC44A5/gene-WWTR1
GO:0035107	appendage morphogenesis	7/257	291/10946	1.02	0.528213	0.762804	gene-ARHGEF5/gene-DLC1/gene-EGFR/gene-GPC2/gene-GRHL3/gene-PCNT/gene-TMEM231
GO:0071900	regulation of protein serine/threonine kinase activity	6/257	248/10946	1.03	0.528596	0.762804	gene-AKAP6/gene-NRG2/gene-NRXN3/gene-NTF3/gene-SHC3/gene-WNK4
GO:0016072	rRNA metabolic process	2/257	75/10946	1.14	0.528948	0.762804	gene-RRN3/gene-SRFBP1
GO:0016458	gene silencing	2/257	75/10946	1.14	0.528948	0.762804	gene-HDAC9/gene-IFIH1
GO:1900006	positive regulation of dendrite development	2/257	75/10946	1.14	0.528948	0.762804	gene-FAM151B/gene-FAM151BL
GO:0050865	regulation of cell activation	5/257	205/10946	1.04	0.529266	0.762804	gene-CD9/gene-FAM65C/gene-FER/gene-GRB2/gene-TP53BP1
GO:0002793	positive regulation of peptide secretion	4/257	162/10946	1.05	0.530405	0.762804	gene-APBB3/gene-IFIH1/gene-PGF/gene-SELENOT
GO:0002168	instar larval development	1/257	32/10946	1.33	0.532977	0.762804	gene-LLGL2
GO:0003229	ventricular cardiac muscle tissue development	1/257	32/10946	1.33	0.532977	0.762804	gene-NRG2
GO:0003401	axis elongation	1/257	32/10946	1.33	0.532977	0.762804	gene-WWTR1
GO:0007474	imaginal disc-derived wing vein specification	1/257	32/10946	1.33	0.532977	0.762804	gene-EGFR
GO:0009119	ribonucleoside metabolic process	1/257	32/10946	1.33	0.532977	0.762804	gene-MPP2
GO:0014016	neuroblast differentiation	1/257	32/10946	1.33	0.532977	0.762804	gene-TCF4
GO:0030199	collagen fibril organization	1/257	32/10946	1.33	0.532977	0.762804	gene-CDH10
GO:0031076	embryonic camera-type eye development	1/257	32/10946	1.33	0.532977	0.762804	gene-KDM2A
GO:0032436	positive regulation of proteasomal ubiquitin-dependent protein catabolic process	1/257	32/10946	1.33	0.532977	0.762804	gene-RNF114
GO:0032663	regulation of interleukin-2 production	1/257	32/10946	1.33	0.532977	0.762804	gene-HDAC9
GO:0032781	positive regulation of ATPase activity	1/257	32/10946	1.33	0.532977	0.762804	gene-GABARAPL2
GO:0033013	tetrapyrrole metabolic process	1/257	32/10946	1.33	0.532977	0.762804	gene-GIF
GO:0035194	post-transcriptional gene silencing by RNA	1/257	32/10946	1.33	0.532977	0.762804	gene-IFIH1
GO:0035924	cellular response to vascular endothelial growth factor stimulus	1/257	32/10946	1.33	0.532977	0.762804	gene-SHC3
GO:0042771	intrinsic apoptotic signaling pathway in response to DNA damage by p53 class mediator	1/257	32/10946	1.33	0.532977	0.762804	gene-LOC121108310
GO:0045494	photoreceptor cell maintenance	1/257	32/10946	1.33	0.532977	0.762804	gene-MAP1A
GO:0046548	retinal rod cell development	1/257	32/10946	1.33	0.532977	0.762804	gene-LOC121108310
GO:0048710	regulation of astrocyte differentiation	1/257	32/10946	1.33	0.532977	0.762804	gene-KDM4B
GO:0090162	establishment of epithelial cell polarity	1/257	32/10946	1.33	0.532977	0.762804	gene-LLGL2
GO:0090207	regulation of triglyceride metabolic process	1/257	32/10946	1.33	0.532977	0.762804	gene-PLIN3
GO:1902742	apoptotic process involved in development	1/257	32/10946	1.33	0.532977	0.762804	gene-MEGF10
GO:1904397	negative regulation of neuromuscular junction development	1/257	32/10946	1.33	0.532977	0.762804	gene-PATL1
GO:1901615	organic hydroxy compound metabolic process	5/257	206/10946	1.03	0.533608	0.763318	gene-ARHGEF5/gene-BAAT/gene-DIO2/gene-LBFABP/gene-SHC3
GO:0006650	glycerophospholipid metabolic process	4/257	163/10946	1.05	0.535277	0.764722	gene-GRB2/gene-NRG2/gene-PLA2G4A/gene-SLC44A5
GO:0030261	chromosome condensation	2/257	76/10946	1.12	0.536101	0.764722	gene-LOC121108310/gene-SLF1
GO:0042177	negative regulation of protein catabolic process	2/257	76/10946	1.12	0.536101	0.764722	gene-GABARAPL2/gene-MAP1A
GO:0051928	positive regulation of calcium ion transport	2/257	76/10946	1.12	0.536101	0.764722	gene-AKAP6/gene-WNK4
GO:1905477	positive regulation of protein localization to membrane	2/257	76/10946	1.12	0.536101	0.764722	gene-NRXN3/gene-WNK4
GO:0001655	urogenital system development	6/257	250/10946	1.02	0.536494	0.764722	gene-DLC1/gene-EGFR/gene-HDAC9/gene-PCNT/gene-TCF4/gene-WWTR1
GO:0008610	lipid biosynthetic process	6/257	250/10946	1.02	0.536494	0.764722	gene-BAAT/gene-CERS4/gene-GRB2/gene-HACD4/gene-PLA2G4A/gene-SLC44A5
GO:0003002	regionalization	10/257	423/10946	1.01	0.537163	0.765286	gene-EGFR/gene-GPC2/gene-IFIH1/gene-KDM2A/gene-LLGL2/gene-NTF3/gene-TCTN3/gene-UBAP2/gene-WWTR1/gene-ZNF821
GO:0006997	nucleus organization	3/257	120/10946	1.06	0.538056	0.765289	gene-LOC121106525/gene-LOC121108310/gene-RRN3
GO:0042742	defense response to bacterium	3/257	120/10946	1.06	0.538056	0.765289	gene-ANKHD1/gene-SHC3/gene-TNFAIP8L1
GO:0071241	cellular response to inorganic substance	3/257	120/10946	1.06	0.538056	0.765289	gene-BECN1/gene-NRXN3/gene-WNK4
GO:0007612	learning	4/257	164/10946	1.04	0.540125	0.765289	gene-APBB3/gene-EGFR/gene-MAP1A/gene-NRXN3
GO:0045860	positive regulation of protein kinase activity	6/257	251/10946	1.02	0.540423	0.765289	gene-AKAP6/gene-NRG2/gene-NRXN3/gene-NTF3/gene-SHC3/gene-WNK4
GO:0006575	cellular modified amino acid metabolic process	2/257	77/10946	1.11	0.54318	0.765289	gene-DIO2/gene-PLA2G4A
GO:0016241	regulation of macroautophagy	2/257	77/10946	1.11	0.54318	0.765289	gene-BECN1/gene-FEZ1
GO:0035113	embryonic appendage morphogenesis	2/257	77/10946	1.11	0.54318	0.765289	gene-GRHL3/gene-TMEM231
GO:0030324	lung development	3/257	121/10946	1.06	0.543688	0.765289	gene-GRHL3/gene-MAN2A1/gene-WWTR1
GO:0048754	branching morphogenesis of an epithelial tube	3/257	121/10946	1.06	0.543688	0.765289	gene-GRHL3/gene-KDM4B/gene-WWTR1
GO:1905114	cell surface receptor signaling pathway involved in cell-cell signaling	3/257	121/10946	1.06	0.543688	0.765289	gene-FER/gene-MPP2/gene-SNAI1
GO:0007398	ectoderm development	1/257	33/10946	1.29	0.543974	0.765289	gene-ZNF821
GO:0016198	axon choice point recognition	1/257	33/10946	1.29	0.543974	0.765289	gene-SEMA4D
GO:0030501	positive regulation of bone mineralization	1/257	33/10946	1.29	0.543974	0.765289	gene-PLA2G4A
GO:0045143	homologous chromosome segregation	1/257	33/10946	1.29	0.543974	0.765289	gene-LOC121106525
GO:0045776	negative regulation of blood pressure	1/257	33/10946	1.29	0.543974	0.765289	gene-PGF
GO:0050688	regulation of defense response to virus	1/257	33/10946	1.29	0.543974	0.765289	gene-ANKHD1
GO:0050832	defense response to fungus	1/257	33/10946	1.29	0.543974	0.765289	gene-CORO1B
GO:0050871	positive regulation of B cell activation	1/257	33/10946	1.29	0.543974	0.765289	gene-TP53BP1
GO:0050885	neuromuscular process controlling balance	1/257	33/10946	1.29	0.543974	0.765289	gene-NRXN3
GO:0050919	negative chemotaxis	1/257	33/10946	1.29	0.543974	0.765289	gene-FLRT2
GO:0060324	face development	1/257	33/10946	1.29	0.543974	0.765289	gene-GRHL3
GO:0070169	positive regulation of biomineral tissue development	1/257	33/10946	1.29	0.543974	0.765289	gene-PLA2G4A
GO:0080171	lytic vacuole organization	1/257	33/10946	1.29	0.543974	0.765289	gene-BECN1
GO:2000310	regulation of NMDA receptor activity	1/257	33/10946	1.29	0.543974	0.765289	gene-NRXN3
[truncated: 1,681 more rows]

[truncated: 10 more sheets: Table S11, Table S12, Table S13, Table S14, Table S15, Table S16, Table S17, Table S18, Table S19, Table S20]
